# Supplementary material for: Highly luminescent palladium(ii) complexes with sub-millisecond blue to green phosphorescent excited states. Photocatalysis and highly efficient PSF-OLEDs
Source: PubMed Central journal article supplement (PMC6024183; doi:10.1039/c6sc00462h), 2016-06-15
Supplement: SC-007-C6SC00462H-s001.pdf [file SC-007-C6SC00462H-s001.pdf]

## Electronic Supplementary Information

### Highly luminescent palladium(II) complexes with sub-millisecond blue to green phosphorescent excited states. Photocatalysis and highly efficient PSF-OLEDs

Pui-Keong Chow,<sup>a</sup> Gang Cheng,<sup>ab</sup> Glenna So Ming Tong,<sup>a</sup> Chensheng Ma,<sup>c</sup> Wai-Ming Kwok,<sup>d</sup> Wai-Hung Ang,<sup>a</sup> Clive Yik-Sham Chung,<sup>a</sup> Chen Yang,<sup>a</sup> Feng Wang<sup>a</sup> and Chi-Ming Che<sup>\*ab</sup>

<sup>a</sup> State Key Laboratory of Synthetic Chemistry, Institute of Molecular Functional Materials, HKU-CAS Joint Laboratory on New Materials and Department of Chemistry, The University of Hong Kong, Pokfulam Road, Hong Kong, China. E-mail: cmche@hku.hk

<sup>b</sup> HKU Shenzhen Institute of Research and Innovation, Shenzhen 518053, China.

<sup>c</sup> School of chemistry and Chemical Engineering, Shenzhen University, Shenzhen 518060, China.

<sup>d</sup> Department of Applied Biology and Chemical Technology, The Hong Kong Polytechnic University, Hung Hom, Kowloon, Hong Kong SAR, China.

#### Table of Contents

|                                                                                                                                                                                                                                                                                                       | Page 2 |
|-------------------------------------------------------------------------------------------------------------------------------------------------------------------------------------------------------------------------------------------------------------------------------------------------------|--------|
| Synthesis and characterization                                                                                                                                                                                                                                                                        | 2      |
| Steady-state emission and lifetime measurements                                                                                                                                                                                                                                                       | 3      |
| Time-resolved spectroscopy                                                                                                                                                                                                                                                                            | 4      |
| OLEDs fabrications and characterization                                                                                                                                                                                                                                                               | 4      |
| Computational details                                                                                                                                                                                                                                                                                 | 5      |
| General procedure for visible-light-induced reductive C–C bond formation                                                                                                                                                                                                                              | 6      |
| General procedure for [2+2] cycloaddition of styrenes                                                                                                                                                                                                                                                 | 6      |
| Scheme for the syntheses of starting materials and ligands of <b>Pd-B-1</b> , <b>Pd-B-3</b> , <b>Pd-B-4</b> and <b>Pd-N-1</b>                                                                                                                                                                         | 28     |
| Scheme for the syntheses of metal complexes                                                                                                                                                                                                                                                           | 36     |
| General procedures for the syntheses of starting materials                                                                                                                                                                                                                                            | 28     |
| General procedures for the syntheses of ligands                                                                                                                                                                                                                                                       | 34     |
| General procedures for the syntheses of complexes <b>Pd-B-1</b> to <b>Pd-B-4</b> , <b>Pd-G-1</b> and <b>Pd-N-1</b>                                                                                                                                                                                    | 36     |
| Further details on energy transfer processes                                                                                                                                                                                                                                                          | 50     |
| Example of NMR analysis of reaction mixture of photochemical reaction                                                                                                                                                                                                                                 | 42     |
| References                                                                                                                                                                                                                                                                                            | 51     |
| <b>Table S1</b> Selected bond angles and distances of <b>Pd-B-3</b>                                                                                                                                                                                                                                   | 8      |
| <b>Table S2</b> Selected bond angles and distances of <b>Pd-B-1</b>                                                                                                                                                                                                                                   | 8      |
| <b>Table S3</b> Crystal data of <b>Pd-B-1</b> and <b>Pd-B-3</b>                                                                                                                                                                                                                                       | 9      |
| <b>Table S4</b> Huang-Rhys factor for the normal modes with frequencies in the range $1500 < \omega_1 \leq 1700$ $\text{cm}^{-1}$ and the estimated non-radiative decay rates $k_{nr}$ of the lowest energy triplet excited state for the complexes <b>Pd-B-1</b> , <b>Pd-B-2</b> , and <b>Pd-N-1</b> | 19     |
| <b>Table S5</b> Reason for the absence of charge transfer reactions between substrate <b>E<sub>1</sub></b> and <b>Pd-B-1/Pd-N-1</b> in excited state                                                                                                                                                  | 24     |
| <b>Tables S6–S11</b> Cartesian coordinates of the optimized geometries of <b>Pd-B-1</b> , <b>Pd-B-2</b> and <b>Pd-N-1</b>                                                                                                                                                                             | 43     |
| <b>Fig. S1</b> <sup>1</sup> H NMR of <b>Pd-B-1</b> at 273 K to 323 K in CDCl <sub>3</sub> (400 MHz)                                                                                                                                                                                                   | 7      |
| <b>Fig. S2</b> Thermograms of <b>Pd-B-1</b> , <b>Pd-B-2</b> , <b>Pd-B-4</b> , <b>Pd-G-1</b> , <b>Pd-G-2</b> and <b>Pd-N-1</b>                                                                                                                                                                         | 7      |
| <b>Fig. S3</b> X-ray crystal structure of <b>Pd-B-3</b>                                                                                                                                                                                                                                               | 8      |
| <b>Fig. S4</b> Cyclic voltammograms of <b>Pd-B-2</b> , <b>Pd-B-4</b> , <b>Pd-G-1</b> , <b>Pd-G-2</b> in DMF (0.1 mol dm <sup>-3</sup> <i>n</i> Bu <sub>4</sub> NPF <sub>6</sub> as supporting electrolyte) at 298 K. Scan rate: 100 mV s <sup>-1</sup>                                                | 10     |
| <b>Fig. S5</b> HOMO and LUMO surfaces for <b>Pd-B-1</b> , <b>Pd-B-2</b> , <b>Pd-B-4</b> , <b>Pd-N-1</b> , and <b>Pd-G-1</b>                                                                                                                                                                           | 10     |
| <b>Fig. S6</b> Cyclic voltammograms of <b>Pd-B-1</b> and <b>Pd-B-2</b> in DMF (0.1 mol dm <sup>-3</sup> <i>n</i> Bu <sub>4</sub> NPF <sub>6</sub> as supporting electrolyte) at 298 K                                                                                                                 | 12     |
| <b>Fig. S7</b> UV/Vis absorption spectra of <b>Pd-B-1</b> , <b>Pd-B-2</b> , and ligand of <b>Pd-B-1</b> in CH <sub>2</sub> Cl <sub>2</sub> at room temperature                                                                                                                                        | 12     |
| <b>Fig. S8</b> UV/Vis absorption spectra of <b>Pd-G-1</b> , <b>Pd-G-2</b> , and ligand of <b>Pd-G-2</b> in CH <sub>2</sub> Cl <sub>2</sub> at room temperature                                                                                                                                        | 13     |

|                                                                                                                                                                                                                                                                                                                                                                                                                                                                                                                                                                                                                                                        |    |
|--------------------------------------------------------------------------------------------------------------------------------------------------------------------------------------------------------------------------------------------------------------------------------------------------------------------------------------------------------------------------------------------------------------------------------------------------------------------------------------------------------------------------------------------------------------------------------------------------------------------------------------------------------|----|
| <b>Fig. S9</b> UV/Vis absorption spectra of <b>Pd-B-1</b> in various solvents ( $4 \times 10^{-5}$ mol dm <sup>-3</sup> ) at room temperature                                                                                                                                                                                                                                                                                                                                                                                                                                                                                                          | 13 |
| <b>Fig. S10</b> UV/Vis absorption spectra of <b>Pd-G-2</b> in various solvents ( $5 \times 10^{-5}$ mol dm <sup>-3</sup> ) at room temperature                                                                                                                                                                                                                                                                                                                                                                                                                                                                                                         | 14 |
| <b>Fig. S11</b> Emission spectra of <b>Pd-B-1</b> in various solvents ( $4 \times 10^{-5}$ mol dm <sup>-3</sup> ) at room temperature                                                                                                                                                                                                                                                                                                                                                                                                                                                                                                                  | 14 |
| <b>Fig. S12</b> Emission spectra of <b>Pd-G-2</b> in various solvents ( $5 \times 10^{-5}$ mol dm <sup>-3</sup> ) at room temperature                                                                                                                                                                                                                                                                                                                                                                                                                                                                                                                  | 15 |
| <b>Fig. S13</b> Temperature-dependent emission spectra of <b>Pd-B-1</b> in toluene ( $5 \times 10^{-5}$ mol dm <sup>-3</sup> )                                                                                                                                                                                                                                                                                                                                                                                                                                                                                                                         | 15 |
| <b>Fig. S14</b> Plots of $\tau_{\text{obs}}$ against temperature of <b>Pd-B-1</b> in the solid state and in PMMA (5% dopant concentration)                                                                                                                                                                                                                                                                                                                                                                                                                                                                                                             | 16 |
| <b>Fig. S15</b> Relevant MO surfaces for the T <sub>1</sub> excited state of the <b>Pd-B-2</b>                                                                                                                                                                                                                                                                                                                                                                                                                                                                                                                                                         | 17 |
| <b>Fig. S16</b> Relevant MO surfaces for the T <sub>1</sub> excited state of the <b>Pd-B-1</b>                                                                                                                                                                                                                                                                                                                                                                                                                                                                                                                                                         | 18 |
| <b>Fig. S17</b> Relevant MO surfaces for the T <sub>1</sub> excited state of the <b>Pd-N-1</b>                                                                                                                                                                                                                                                                                                                                                                                                                                                                                                                                                         | 19 |
| <b>Fig. S18</b> Temporal evolution of fs-TRF and experimental and fitted kinetic decays of fs-TRF obtained for <b>Pd-N-1</b> and <b>Pd-G-1</b> in CH <sub>2</sub> Cl <sub>2</sub> with excitation at 300 nm wavelength                                                                                                                                                                                                                                                                                                                                                                                                                                 | 20 |
| <b>Fig. S19</b> Temporal evolution of fs-TRF and experimental and fitted kinetic decays of fs-TRF obtained for <b>Pd-B-1</b> and <b>Pd-B-2</b> in CH <sub>2</sub> Cl <sub>2</sub> with excitation at 300 nm wavelength                                                                                                                                                                                                                                                                                                                                                                                                                                 | 20 |
| <b>Fig. S20</b> nsTRE and ns-TA spectra of <b>Pd-B-1</b> in degassed CH <sub>2</sub> C <sub>2</sub> ( $5 \times 10^{-5}$ mol dm <sup>-3</sup> ) at room temperature.                                                                                                                                                                                                                                                                                                                                                                                                                                                                                   | 21 |
| <b>Fig. S21</b> Time resolved absorption difference spectra of <b>Pd-B-1</b> ( $5 \times 10^{-5}$ mol dm <sup>-3</sup> ) in degassed CH <sub>3</sub> CN monitored at 0–100 $\mu$ s; Time resolved absorption difference spectra of <b>Pd-B-1</b> ( $5 \times 10^{-5}$ mol dm <sup>-3</sup> ) in non-degassed CH <sub>3</sub> CN monitored at 0–400 ns                                                                                                                                                                                                                                                                                                  | 21 |
| <b>Fig. S22</b> Time resolved absorption difference spectra of <b>Pd-B-1</b> ( $5 \times 10^{-5}$ mol dm <sup>-3</sup> ) and TMEDA (0.69 mol dm <sup>-3</sup> ) in degassed CH <sub>3</sub> CN monitored at 0–100 $\mu$ s. Inset shows the decay of emission at 466 nm (black) and TA at 398 nm (red)                                                                                                                                                                                                                                                                                                                                                  | 22 |
| <b>Fig. S23</b> Stern-Volmer plot of the quenching of <b>Pd-B-1</b> at 466 nm by MV <sup>2+</sup>                                                                                                                                                                                                                                                                                                                                                                                                                                                                                                                                                      | 22 |
| <b>Fig. S24</b> Time resolved absorption difference spectra of <b>Pd-B-1</b> ( $5 \times 10^{-5}$ mol dm <sup>-3</sup> ) and MV(PF <sub>6</sub> ) <sub>2</sub> ( $2.5 \times 10^{-4}$ mol dm <sup>-3</sup> ) in CH <sub>3</sub> CN monitored at 0–2 $\mu$ s. Insets show the decays of emission at 466 nm (black), TA at 436 nm (red) and TA at 398 (blue)                                                                                                                                                                                                                                                                                             | 23 |
| <b>Fig. S25</b> Time-resolved absorption difference spectra of <b>Pd-N-1</b> ( $5 \times 10^{-5}$ mol dm <sup>-3</sup> ) in degassed CH <sub>3</sub> CN monitored at 0–80 $\mu$ s; time-resolved absorption difference spectra of <b>Pd-N-1</b> ( $5 \times 10^{-5}$ mol dm <sup>-3</sup> ) and <i>i</i> PrNEt (0.01 mol dm <sup>-3</sup> ) in degassed CH <sub>3</sub> CN monitored at 0–80 $\mu$ s; time-resolved absorption difference spectra of <b>Pd-N-1</b> ( $5 \times 10^{-5}$ mol dm <sup>-3</sup> ) and substrate <b>A<sub>1</sub></b> ( $5 \times 10^{-3}$ mol dm <sup>-3</sup> ) in degassed CH <sub>3</sub> CN monitored at 0–80 $\mu$ s | 23 |
| <b>Fig. S26</b> Stern-Volmer plot of quenching of emission of <b>Pd-B-1</b> and <b>Pd-N-1</b> by substrate <b>E<sub>1</sub></b>                                                                                                                                                                                                                                                                                                                                                                                                                                                                                                                        | 24 |
| <b>Fig. S27</b> Normalized EL spectra and external quantum efficiency-luminance characteristics of OLEDs with <b>Pd-G-1</b> at the dopant concentrations of 4, 10 and 20 wt%                                                                                                                                                                                                                                                                                                                                                                                                                                                                           | 25 |
| <b>Fig. S28</b> Normalized EL spectra and external quantum efficiency-luminance characteristics of OLEDs with <b>Pd-G-2</b> at the dopant concentrations of 4, 10 and 20 wt%                                                                                                                                                                                                                                                                                                                                                                                                                                                                           | 25 |
| <b>Fig. S29</b> Normalized EL spectra and external quantum efficiency-luminance characteristics of OLEDs with <b>Pd-B-1</b> at the dopant concentrations of 2, 6 and 10 wt%                                                                                                                                                                                                                                                                                                                                                                                                                                                                            | 26 |
| <b>Fig. S30</b> Normalized EL spectra and external quantum efficiency-luminance characteristics of OLEDs with <b>Pd-B-2</b> at the dopant concentrations of 2, 6 and 10 wt%.                                                                                                                                                                                                                                                                                                                                                                                                                                                                           | 26 |
| <b>Fig. S31</b> Device lifetime (T <sub>90</sub> ) of the OLED with <b>Pd-G-1</b> as emitter as well as PSF-OLED with <b>Pd-G-1</b> as phosphorescent sensitizer and TBRb as fluorescent emitter                                                                                                                                                                                                                                                                                                                                                                                                                                                       | 27 |
| <b>Fig. S32–S37</b> <sup>1</sup> H NMR spectra of <b>Pd-B-1</b> to <b>Pd-B-4</b> , <b>Pd-G-1</b> and <b>Pd-N-1</b>                                                                                                                                                                                                                                                                                                                                                                                                                                                                                                                                     | 37 |

## Synthesis and characterization

Palladium(II) acetate and the starting materials for the synthesis of ligands (purchased from Sigma-Aldrich) were used as received. Unless specified, solvents of analytical grade were used in the syntheses. THF and toluene were distilled over sodium/benzophenone under a nitrogen atmosphere prior to use.

$^1\text{H}$  NMR spectroscopic experiments were performed with a Bruker Avance 500, 400, 600 or DPX-300 FT-NMR spectrometer.  $^{19}\text{F}$  NMR spectroscopic experiments were performed with a Bruker Avance 400 FT-NMR spectrometer. Chemical shifts [ppm] reported were calibrated to the solvent residual peak(s) or tetramethylsilane (TMS) as a internal reference. Peak assignments were based on  $^1\text{H}$ ,  $^1\text{H}$  COSY and NOESY 2D NMR spectroscopic experiments. EI mass spectra were recorded with a Finnigan MAT 95 mass spectrometer. Elemental analyses of the complexes were performed at the Institute of Chemistry of the Chinese Academy of Sciences, Beijing. UV/Vis absorption spectra were recorded with a Hewlett-Packard 8453 diode spectrophotometer. X-ray diffraction data of single crystals were collected with a Bruker X8 Proteum diffractometer. The diffraction images were interpreted and the diffraction intensities were integrated by using the program SAINT. The crystal structure was solved by direct methods employing the SHELXS-97 program.<sup>1</sup> Cyclic voltammetric measurements were performed with a Princeton Applied Research electrochemical analyzer (potentiostat/galvanostat Model 273A) with a conventional three-compartmental cell.  $^t\text{Bu}_4\text{NPF}_6$  ( $0.1 \text{ mol dm}^{-3}$ ) in DMF was used as a supporting electrolyte for the electrochemical measurements at room temperature. All solutions used in electrochemical measurements were deaerated with pre-purified argon gas.  $\text{Ag}/\text{AgNO}_3$  ( $0.1 \text{ mol dm}^{-3}$  in acetonitrile), a glassy carbon electrode, and a platinum wire were used as reference electrode, working electrode, and counter electrode, respectively. Ferrocene was used as an internal reference.

## Steady-state emission and lifetime measurements

Steady-state excitation and emission spectra were obtained with a SPEX Fluorolog-3 spectrophotometer. All solutions for photophysical measurements were degassed with no less than 5 successive freeze-pump-thaw cycles prior to the measurements. The emission spectra were corrected for monochromator and photomultiplier efficiency and for xenon-lamp stability. Emission lifetime measurements were carried out with a Quanta Ray GCR 150-10 pulsed Nd:YAG laser system (pulse output: 355 nm, 5–6 ns). Luminescence quantum yields were measured by the optical dilution method with  $[\text{Ru}(\text{bpy})_3](\text{PF}_6)_2$  (bpy = 2,2'-bipyridine) in degassed acetonitrile ( $\Phi_{\text{em}} = 0.062$ ) or BPEA (9,10-bis(phenylethynyl)anthracene) in degassed benzene ( $\Phi_{\text{em}} = 0.85$ ) as a

standard and calculated by:  $\Phi_s = \Phi_r(B_r/B_s)(n_s/n_r)^2(D_s/D_r)$ , in which the subscripts s and r refer to sample and reference standard solution, respectively,  $n$  is the refractive index of the solvents,  $D$  is the integrated intensity, and  $\Phi_{em}$  is luminescence quantum yield. The refractive indices of the solvents at room temperature were taken from standard sources. Errors for  $\Phi_{em}$  values ( $\pm 10\%$ ) were estimated. Thin film samples for photoluminescence (PL) spectra and absolute quantum yield (QY) measurement were fabricated by drop casting PMMA-complex solutions (PMMA to complex ratio is 95:5; chlorobenzene to solute ratio is 95:5) on quartz plates. PL spectra and absolute QY were recorded on a Horiba Jobinyvon Fluorolog-3 fluorescence spectrofluorometer equipped an integrating sphere model: F-3018.

### **Time-resolved spectroscopy**

Femtosecond time-resolved fluorescence (fs-TRF) measurements were performed based on a commercial Ti:sapphire regenerative amplifier laser system (800 nm, 40 fs, 1 KHz, and 3.5 mJ/pulse). The pump pulse with wavelength at 355, 380, 400 nm was produced from TOPAS-C pumped by the 800 nm fundamental laser. The fs-TRF was achieved by employing the Kerr-gate technique.<sup>2</sup> A Kerr device, consisting of a 1 mm-thick Kerr medium (benzene contained in a quartz cell) equipped within a crossed polarizer pair, was driven by the 800 nm laser to function as an ultrafast optical shutter to sample transient fluorescence spectra at various selected pump/probe delays. The temporal delay of probe to pump pulse was varied by a computer controlled optical delay line. The fs-TRF signals were collected by a monochromator and detected with a liquid-nitrogen cooled CCD detector. The instrument response function (IRF) of fs-TRF is wavelength-dependent. As the detection wavelength varies from 600 to 280 nm, the IRF varies from  $\sim 0.5$  to  $\sim 2$  ps. All the time-resolved measurements were done at room temperature and atmospheric pressure with  $\sim 15$  mL samples flowed into a cell with 0.5 mm path length to avoid photo-degradation. The sample solutions were monitored by UV/Vis absorption spectroscopy and revealed no degradation after the fs time-resolved experiments.

The nanosecond time-resolved emission spectra (ns-TRE) and nanosecond time-resolved absorption difference spectra (ns-TA) were performed with a LP920-KS Laser Flash Photolysis Spectrometer (Edinburgh Instruments LTD., Livingston, UK). The excitation source was the 355 nm output (third harmonic) of an Nd:YAG laser (Spectra-Physics Quanta-Ray Lab-130 Pulsed Nd:YAG Laser). The signals were processed by a PC plugin controlled with L900 software. The preparation of samples for the measurements was the same as those for steady-state emission measurements.

## OLEDs fabrications and characterization

### (a) Materials

TAPC (4,4'-cyclohexylidenebis[*N,N*-bis(4-methylphenyl)benzamine]),  
NPB (*N,N'*-bis(naphthalen-1-yl)-*N,N'*-bis(phenyl)-benzidine)mCP (1,3-bis(carbazol-9-yl)benzene)CzSi (9-(4-*tert*-butylphenyl)-3,6-bis(triphenylsilyl)-9*H*-carbazole)CBP (3,3-di(9*H*-carbazol-9-yl)biphenyl),  
BAIq (bis(2-methyl-8-quinolinolate)-4-(phenylphenolato)aluminium)Alq (tris(8-hydroxyquinolino)aluminum),  
TmPyPB (3,3'-[5'-[3-(3-pyridinyl)phenyl] [1,1':3',1''-terphenyl]-3,3''-diyl] bispyridine),  
TBRb (2,8-Di-*tert*-butyl-5,11-bis(4-*tert*-butylphenyl)-6,12-diphenyltetracene),  
TPPA (9,10-bis[*N,N*-di-(*p*-tolyl)-amino]anthracene)  
TCTA (tris(4-carbazoyl-9-ylphenyl)amine),  
TSPO1 (diphenyl-4-triphenylsilyl phenyl-phosphineoxide)  
were purchased from Luminescence Technology Corp. MoO<sub>3</sub> and LiF were purchased from Sigma-Aldrich. All of these materials were used as received.

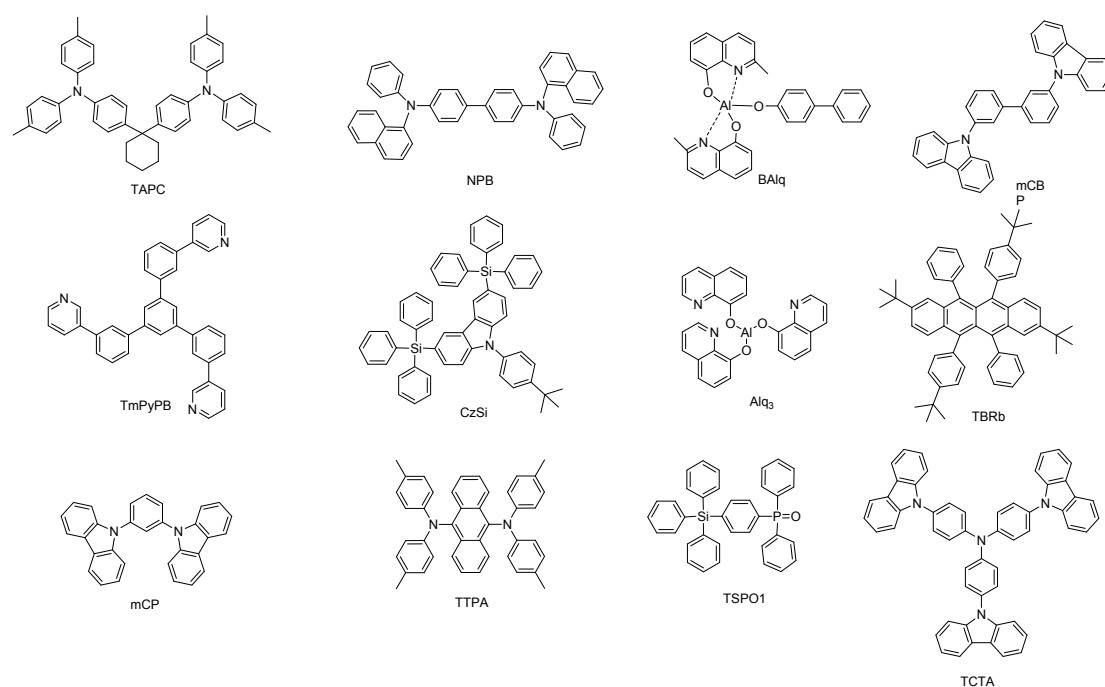

### (b) Device fabrication and characterization

Pre-patterned ITO-glass substrates were cleaned in an ultrasonic bath of Decon 90 detergent and deionized water, rinsed with deionized water, and then cleaned in sequential ultrasonic baths of deionized water, acetone, and *iso*-propanol, and subsequently dried in an oven for 1 hour. OLEDs were fabricated in a Kurt J. Lesker SPECTROS vacuum deposition system with a base pressure of 10<sup>-8</sup> mBar. In the vacuum chamber, MoO<sub>3</sub>, organic materials, LiF and Al were thermally deposited. Film thicknesses were determined *in-situ* by calibrated oscillating quartz-crystal

sensors. The Commission Internationale de L'Eclairage (CIE) coordinates, luminance-current density-voltage characteristics ( $L$ - $J$ - $V$ ), and electroluminescence (EL) spectra were measured simultaneously with a programmable Keithley model 2400 source-meter measurement unit and a Photoresearch PR-655 spectrascan spectroradiometer. All devices were characterized at room temperature without encapsulation except for those for device stability investigation. UV-curable sealant, cover glass and desiccant were used to encapsulate the OLEDs for stability investigation. External quantum efficiency and power efficiency were calculated by assuming a Lambertian distribution.

### Computational details

In this work, the hybrid density functional, PBE0,<sup>3</sup> was employed for all calculations using the program package G09.<sup>4</sup> The 6-31G\* basis set<sup>5</sup> is used for all atoms except Pd, which is described by the Stuttgart relativistic pseudopotential and its accompanying basis set (ECP28MWB).<sup>6</sup> Solvent effect was also included by means of the polarizable continuum model (PCM).<sup>7</sup> The solvent employed is dichloromethane. Geometry optimizations of the singlet ground state ( $S_0$ ) were carried out using the density functional theory without symmetry constraints. For the triplet excited state, both unrestricted DFT (UDFT) and time-dependent DFT (TDDFT) were employed to locate the minimum energy triplet excited states. Frequency calculations were performed on the optimized structures to ensure that they are minimum energy structures by the absence of imaginary frequency (i.e.  $N\text{Imag} = 0$ ). Stability calculations were also performed for all the optimized structures to ensure that all the wavefunctions obtained are stable. Details of the Huang-Rhys factors ( $S$ ) and non-radiative rate calculations were reported elsewhere.<sup>8</sup>

As UDFT and TDDFT are two different methods, the minimum energy structures were located by comparing the energies of the triplet excited states calculated using the state-specific SS-PCM TDDFT approach.<sup>9</sup>

### General procedure for visible-light-induced reductive C–C bond formation

Alkyl bromide (~0.02–0.025 g), **Pd-N-1/Pd-B-1** (1 mol%) and diisopropylethylamine ( $i\text{Pr}_2\text{NEt}$ ) were dissolved in acetonitrile (2.3 mL). The reaction mixture was prepared in a test tube (24 mm internal diameter, 170 mm tall) equipped with a magnetic stirrer and a rubber septum. The solution was degassed by bubbling nitrogen gas through the solution for 15 min in the dark. A 2.5 W blue LED ( $\lambda_{\text{em}} = 420\text{--}520$  nm,  $\lambda_{\text{max}} = 462$  nm)/150 W Xenon Lamp was used as the light source. After irradiation of 10–20 h, the solvent was removed under reduced pressure. All the conversions and product

yields were calculated on the basis of  $^1\text{H}$  NMR spectroscopic analysis using 4,4'-dimethyl-2,2'-bipyridine as an internal standard.

### General procedure for [2+2] cycloaddition of styrenes

Styrene ( $0.01 \text{ mol dm}^{-3}$ ) and **Pd-N-1/Pd-B-1**/*fac*-Ir(ppy)<sub>3</sub> (1 mol%) were dissolved in acetonitrile (5 mL). The reaction mixture was prepared in a test tube (24 mm internal diameter, 170 mm tall) equipped with a magnetic stirrer and a rubber septum. The solution was degassed by bubbling nitrogen gas through the solution for 15 min in the dark. A 2.5 W blue LED ( $\lambda_{\text{em}} = 420\text{--}520 \text{ nm}$ ,  $\lambda_{\text{max}} = 462 \text{ nm}$ )/150 W Xenon Lamp/23 W compact fluorescent lamp (1450 lm, 23 lm/W, Philips) was used as the light source. After irradiation of 3–24 h, the solvent was removed under reduced pressure. All the conversions and product yields were calculated on the basis of  $^1\text{H}$  NMR spectroscopic analysis using 4,4'-dimethyl-2,2'-bipyridine as an internal standard.

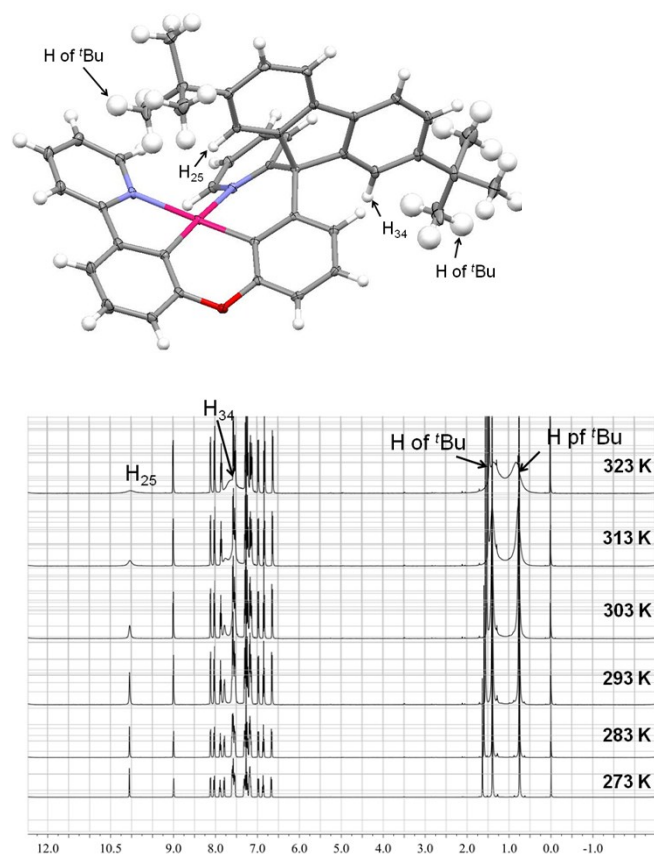

**Fig. S1**  $^1\text{H}$  NMR of **Pd-B-1** at 273 K to 323 K in  $\text{CDCl}_3$  (400 MHz).

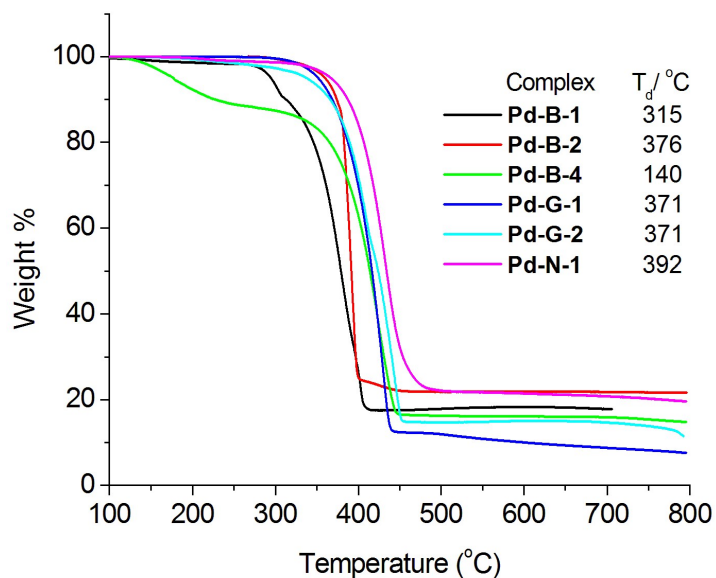

**Fig. S2** Thermograms of **Pd-B-1**, **Pd-B-2**, **Pd-B-4**, **Pd-G-1**, **Pd-G-2** and **Pd-N-1**.

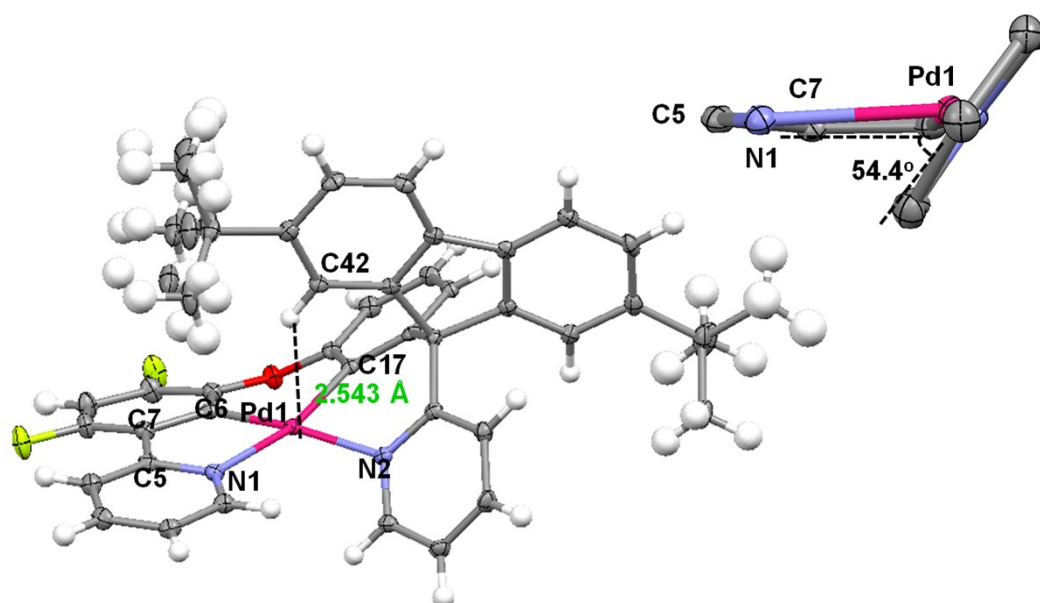

**Fig. S3** X-ray crystal structure of **Pd-B-3**. Thermal ellipsoids are drawn at the 35% probability level (note: the distance between the hydrogen atom residing on C42 and the normal plane of the Pd1-C6-C7-C5-N1 chelating ring is 2.543 Å); the inset depicts the angle between the pyridine ring and the aforementioned chelating ring.

**Table S1** Selected bond angles and distances of **Pd-B-3**

|                  |              |                  |              |
|------------------|--------------|------------------|--------------|
| Pd(1)–N(2)       | 2.0968(19) Å | Pd(1)–N(1)       | 2.1386(18) Å |
| Pd(1)–C(6)       | 1.964(2) Å   | Pd(1)–C(17)      | 1.985(2) Å   |
| C(6)–Pd(1)–N(2)  | 172.67(8)°   | C(17)–Pd(1)–N(1) | 166.77(8)°   |
| C(6)–Pd(1)–N(1)  | 80.10(9)°    | C(6)–Pd(1)–C(17) | 91.51(10)°   |
| C(17)–Pd(1)–N(2) | 88.97(8)°    | N(2)–Pd(1)–N(1)  | 100.66(7)°   |



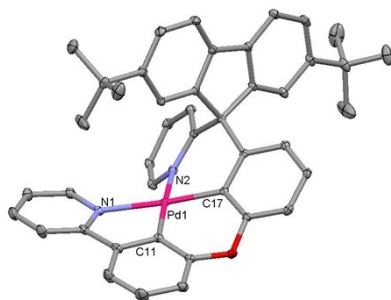

**Table S2** Selected bond angles and distances of **Pd-B-1**

|                  |              |                   |              |
|------------------|--------------|-------------------|--------------|
| Pd(1)–N(2)       | 2.0968(19) Å | Pd(1)–N(1)        | 2.1441(18) Å |
| Pd(1)–C(11)      | 1.958(2) Å   | Pd(1)–C(17)       | 1.982(2) Å   |
| C(11)–Pd(1)–N(2) | 173.74(8)°   | C(17)–Pd(1)–N(1)  | 165.96(7)°   |
| C(11)–Pd(1)–N(1) | 80.51(8)°    | C(11)–Pd(1)–C(17) | 90.39(9)°    |
| C(17)–Pd(1)–N(2) | 90.27(8)°    | N(2)–Pd(1)–N(1)   | 99.95(7)°    |

**Table S3** Crystal data of **Pd-B-1** and **Pd-B-3**

| Complex                               | <b>Pd-B-1</b>                                                                                                 | <b>Pd-B-3</b>                                                     |
|---------------------------------------|---------------------------------------------------------------------------------------------------------------|-------------------------------------------------------------------|
| Empirical formula                     | C <sub>43</sub> H <sub>38</sub> N <sub>2</sub> O <sub>1</sub> Pd·C <sub>4</sub> H <sub>8</sub> O <sub>2</sub> | C <sub>43</sub> H <sub>36</sub> F <sub>2</sub> N <sub>2</sub> OPd |
| Formula weight                        | 793.26                                                                                                        | 741.14                                                            |
| Temperature [K]                       | 100                                                                                                           | 100                                                               |
| Wavelength [Å]                        | 1.54178                                                                                                       | 1.54178                                                           |
| Crystal system                        | Monoclinic                                                                                                    | Monoclinic                                                        |
| Space group                           | P 1 21/c 1                                                                                                    | P2 <sub>1/n</sub>                                                 |
| <i>a</i> [Å]                          | 19.469(3)                                                                                                     | 15.2388(13)                                                       |
| <i>b</i> [Å]                          | 12.2196(16)                                                                                                   | 14.5866(13)                                                       |
| <i>c</i> [Å]                          | 16.391(2)                                                                                                     | 15.9868(14)                                                       |
| $\alpha$ [°]                          | 90                                                                                                            | 90                                                                |
| $\beta$ [°]                           | 102.099(3)                                                                                                    | 106.4424(18)                                                      |
| $\gamma$ [°]                          | 90                                                                                                            | 90                                                                |
| Volume [Å <sup>3</sup> ]              | 3813.0(9)                                                                                                     | 3408.3(5)                                                         |
| <i>Z</i>                              | 4                                                                                                             | 4                                                                 |
| Density (calcd) [g cm <sup>-3</sup> ] | 1.382                                                                                                         | 1.444                                                             |
| Crystal size [mm <sup>3</sup> ]       | 0.4 × 0.3 × 0.3                                                                                               | 0.1 × 0.1 × 0.1                                                   |
| $\mu$ [mm <sup>-1</sup> ]             | 4.271                                                                                                         | 4.781                                                             |
| <i>F</i> (000)                        | 1648                                                                                                          | 1520.0                                                            |
| 2 $\theta$ <sub>max</sub> [°]         | 133.88                                                                                                        | 134.214                                                           |
| Index ranges                          | –23 ≤ <i>h</i> ≤ 22<br>–14 ≤ <i>k</i> ≤ 10                                                                    | –18 ≤ <i>h</i> ≤ 18<br>–17 ≤ <i>k</i> ≤ 17                        |

|                                          |                      |                      |
|------------------------------------------|----------------------|----------------------|
|                                          | $-16 \leq l \leq 19$ | $-18 \leq l \leq 19$ |
| No. of unique data                       | 6652                 | 6015                 |
| No. obsd. Data for $I > 2\sigma(I)$      | 6622                 | 5863                 |
| No. variables                            | 486                  | 464                  |
| $R_1$                                    | 0.0323               | 0.0379               |
| $wR_2$                                   | 0.0885               | 0.1013               |
| Goodness of fit                          | 1.043                | 1.038                |
| Residual $\rho$ [ $e \text{ \AA}^{-3}$ ] | +1.056, -0.565       | +0.447, -0.996       |
| CCDC number                              | CCDC 1048773         | CCDC 1449190         |

Note:  $R_1 = \Sigma ||F_o| - |F_c|| / \Sigma |F_o|$ ,  $wR_2 = \{ \Sigma [w(F_o^2 - F_c^2)^2] / \Sigma [w(F_o^2)^2] \}^{1/2}$

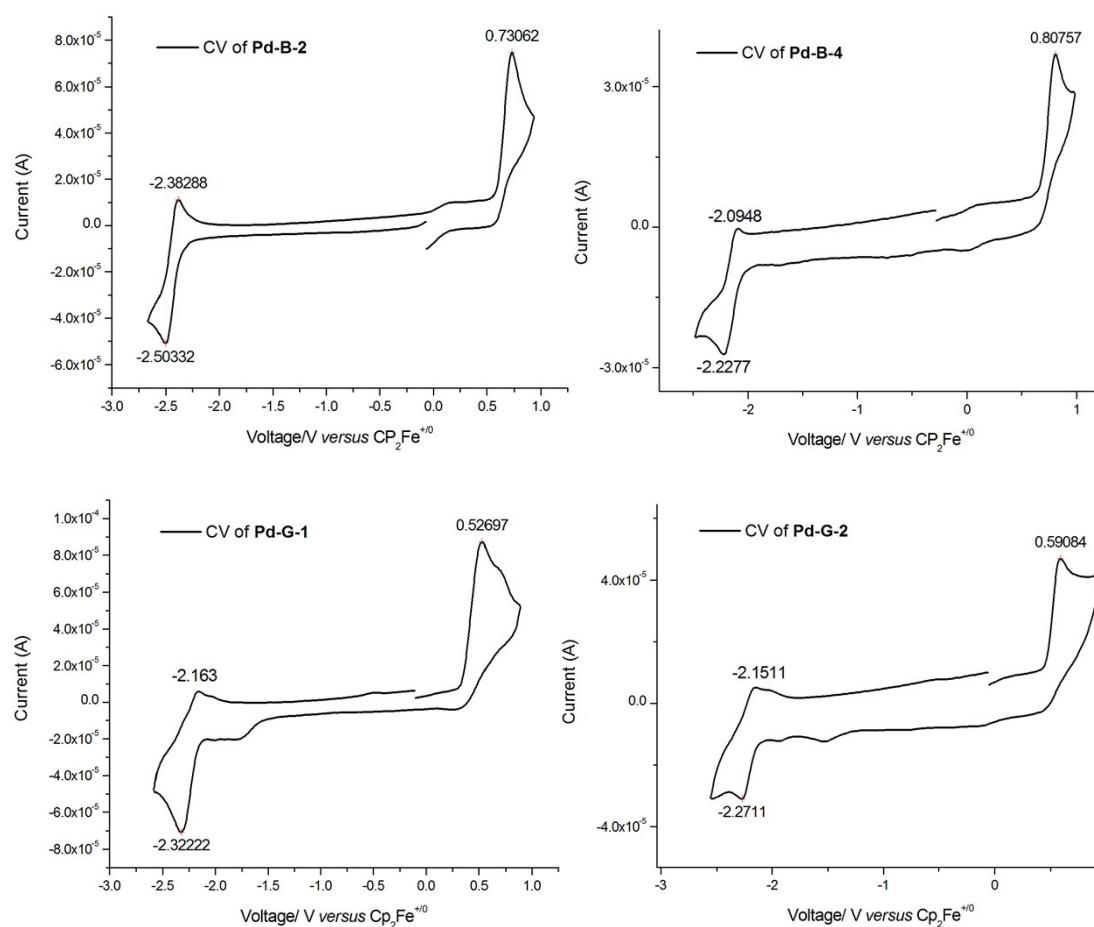

**Fig. S4** Cyclic voltammograms of **Pd-B-2**, **Pd-B-4**, **Pd-G-1**, **Pd-G-2** in DMF ( $0.1 \text{ mol dm}^{-3} n\text{Bu}_4\text{NPF}_6$  as supporting electrolyte) at 298 K. Scan rate:  $100 \text{ mV s}^{-1}$ .

**Fig. S5** HOMO and LUMO surfaces for **Pd-B-1**, **Pd-B-2**, **Pd-B-4**, **Pd-N-1**, and **Pd-G-1<sup>a</sup>**

|  | HOMO | LUMO |
|--|------|------|
|--|------|------|

|               |                                                                                                                                        |                                                                                                                                         |
|---------------|----------------------------------------------------------------------------------------------------------------------------------------|-----------------------------------------------------------------------------------------------------------------------------------------|
| <b>Pd-G-1</b> | 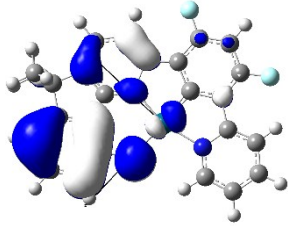 <p data-bbox="475 488 667 524">-5.51 eV (4%)</p>     |  <p data-bbox="928 488 1120 524">-1.74 eV (7%)</p>    |
| <b>Pd-N-1</b> |  <p data-bbox="475 824 667 860">-5.34eV (8%)</p>      |  <p data-bbox="928 824 1120 860">-1.48eV (4%)</p>     |
| <b>Pd-B-1</b> |  <p data-bbox="475 1258 676 1294">-5.57eV (15%)</p>  |  <p data-bbox="928 1258 1129 1294">-1.51eV (5%)</p>  |
| <b>Pd-B-2</b> |  <p data-bbox="475 1594 676 1630">-5.65eV (15%)</p> |  <p data-bbox="928 1594 1129 1630">-1.55eV (5%)</p> |
| <b>Pd-B-4</b> |  <p data-bbox="475 1975 676 2011">-5.58eV (16%)</p> |  <p data-bbox="928 1975 1129 2011">-1.94eV (3%)</p> |

<sup>a</sup> orbital energies are also included with the % of metal character in the parentheses.

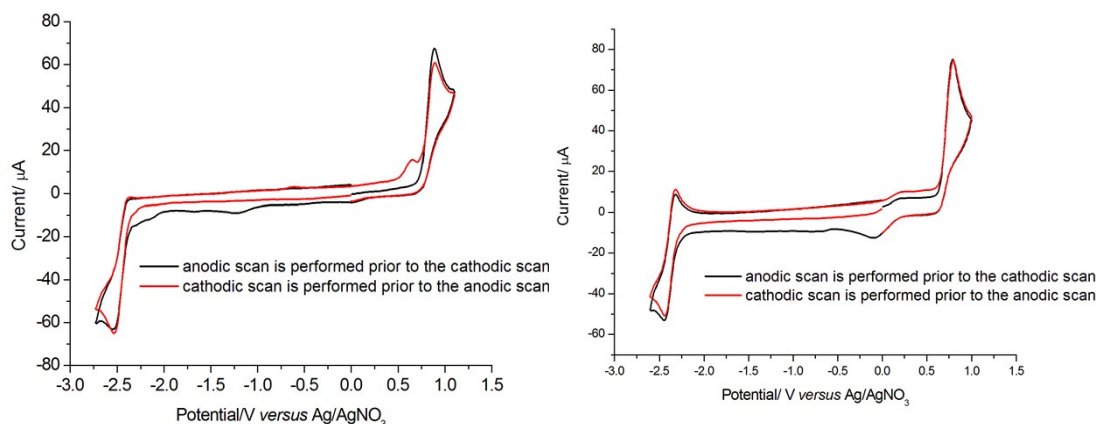

**Fig. S6** Left: Cyclic voltammograms of **Pd-B-1** in DMF ( $0.1 \text{ mol dm}^{-3}$   $n\text{Bu}_4\text{NPF}_6$  as supporting electrolyte) at 298 K. Scan rate:  $100 \text{ mV s}^{-1}$ . Right: Cyclic voltammograms of **Pd-B-2** in DMF ( $0.1 \text{ mol dm}^{-3}$   $n\text{Bu}_4\text{NPF}_6$  as supporting electrolyte) at 298 K. Scan rate:  $100 \text{ mV s}^{-1}$

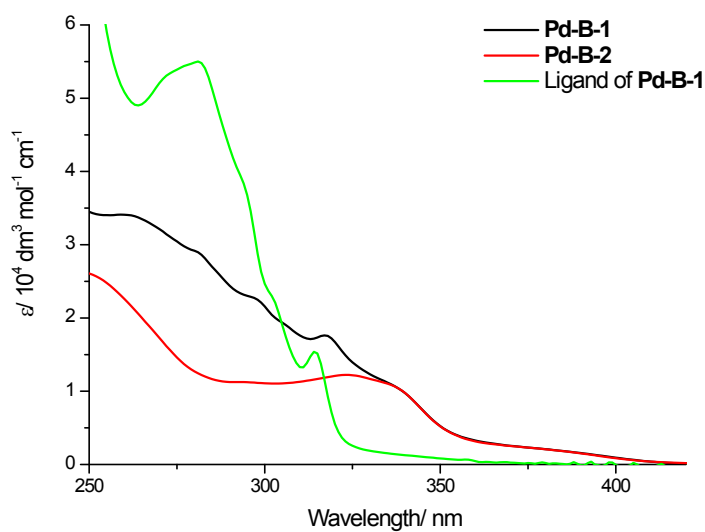

**Fig. S7** UV/Vis absorption spectra of **Pd-B-1**, **Pd-B-2**, and ligand of **Pd-B-1** in  $\text{CH}_2\text{Cl}_2$  at room temperature.

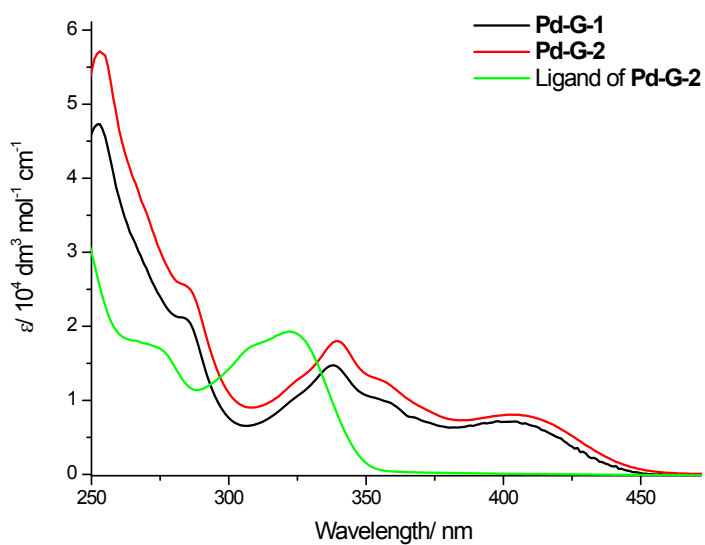

**Fig. S8** UV/Vis absorption spectra of **Pd-G-1**, **Pd-G-2**, and ligand of **Pd-G-2** in  $\text{CH}_2\text{Cl}_2$  at room temperature.

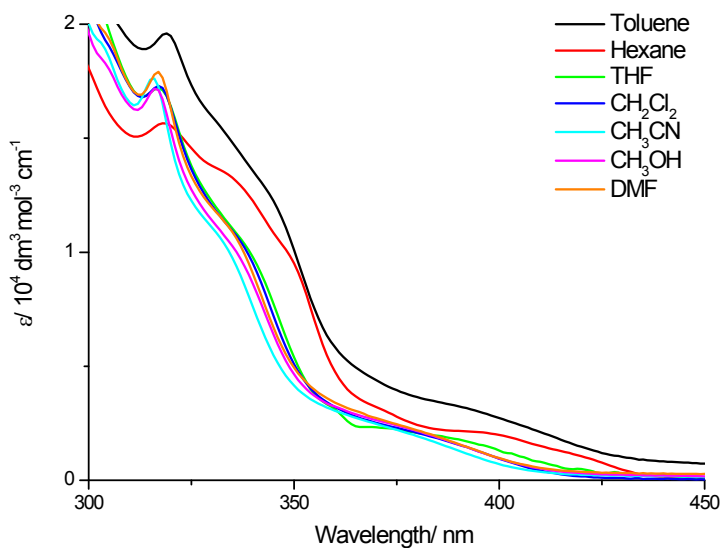

**Fig. S9** UV/Vis absorption spectra of **Pd-B-1** in various solvents ( $4 \times 10^{-5} \text{ mol dm}^{-3}$ ) at room temperature.

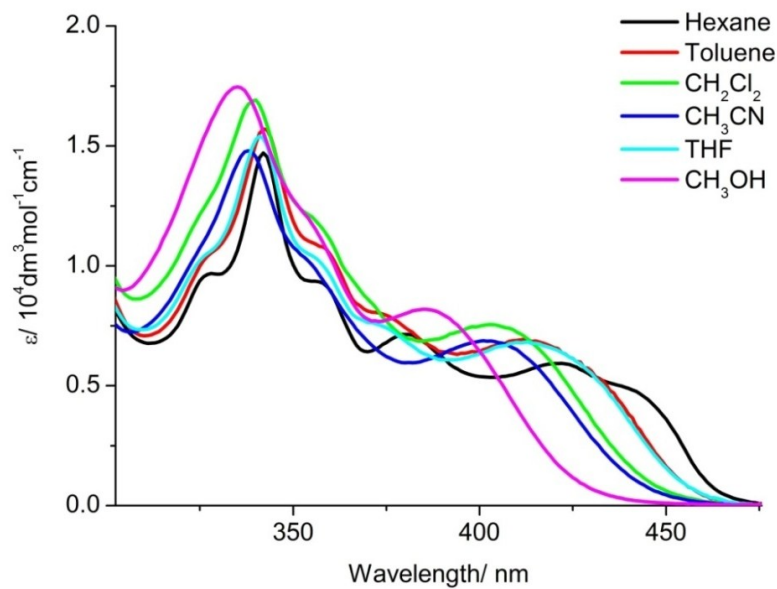

**Fig. S10** UV/Vis absorption spectra of **Pd-G-2** in various solvents ( $5 \times 10^{-5} \text{ mol dm}^{-3}$ ) at room temperature.<sup>10</sup>

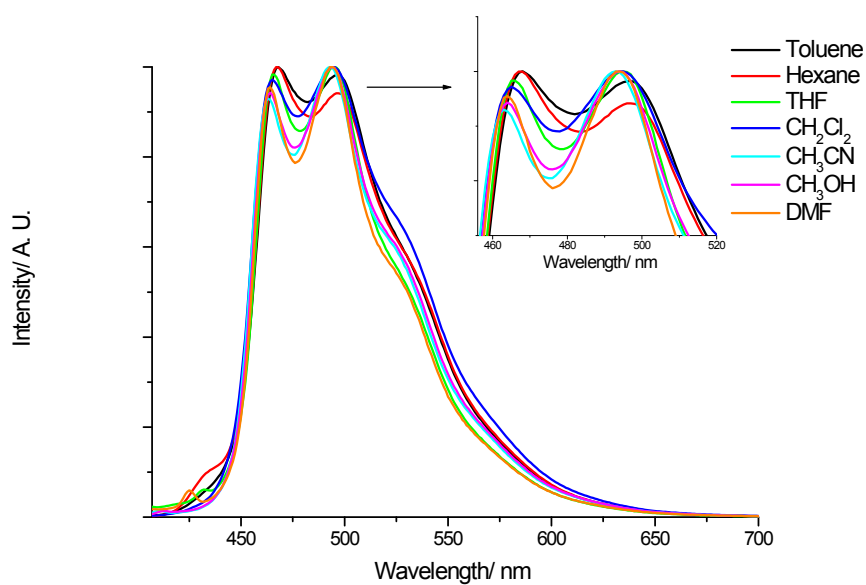

**Fig. S11** Emission spectra of **Pd-B-1** in various solvents ( $4 \times 10^{-5} \text{ mol dm}^{-3}$ ) at room temperature.

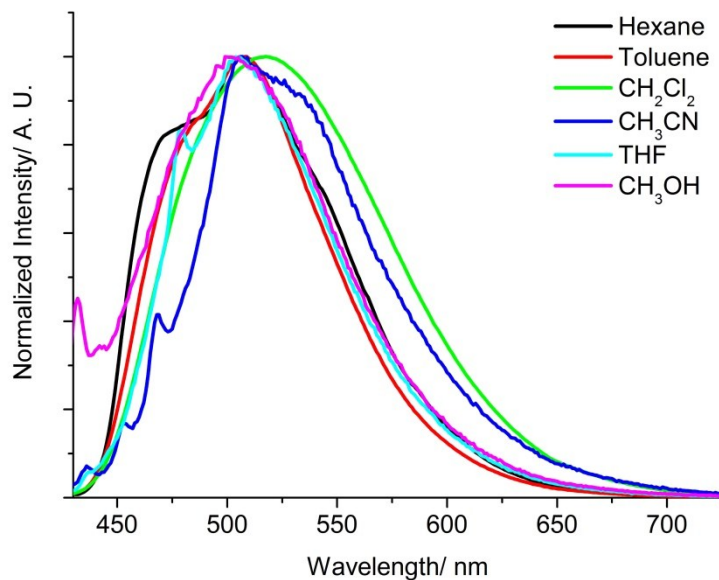

**Fig. S12** Emission spectra of **Pd-G-2** in various solvents ( $5 \times 10^{-5} \text{ mol dm}^{-3}$ ) at room temperature.<sup>10</sup>

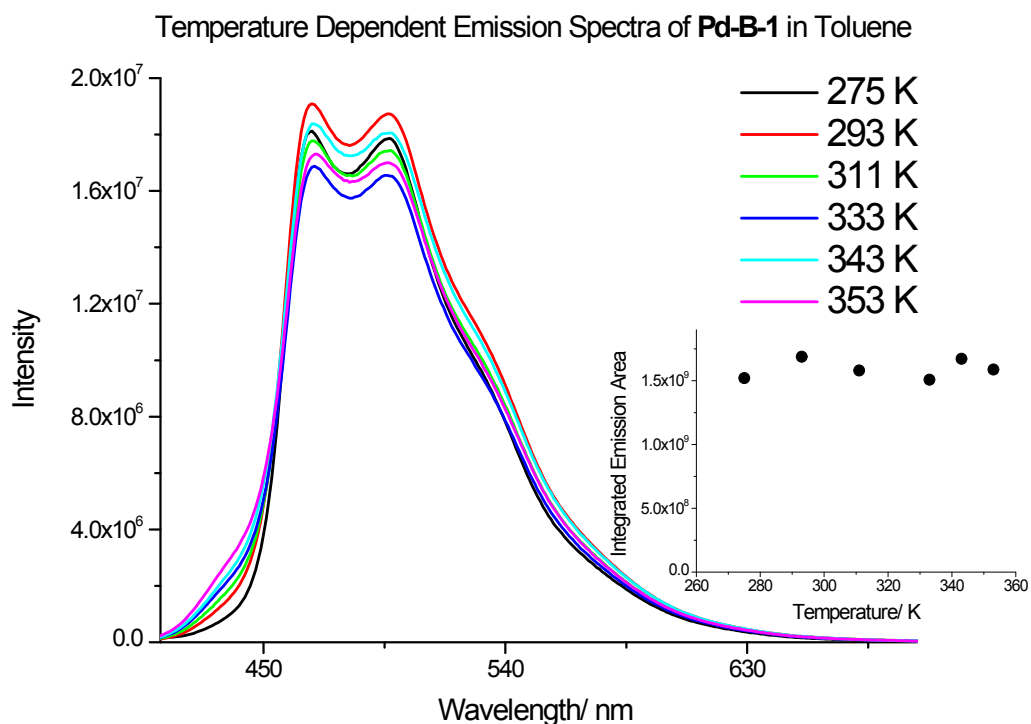

**Fig. S13** Temperature-dependent emission spectra of **Pd-B-1** in toluene ( $5 \times 10^{-5} \text{ mol dm}^{-3}$ ) (inset: the plot of integrated emission area versus temperature).

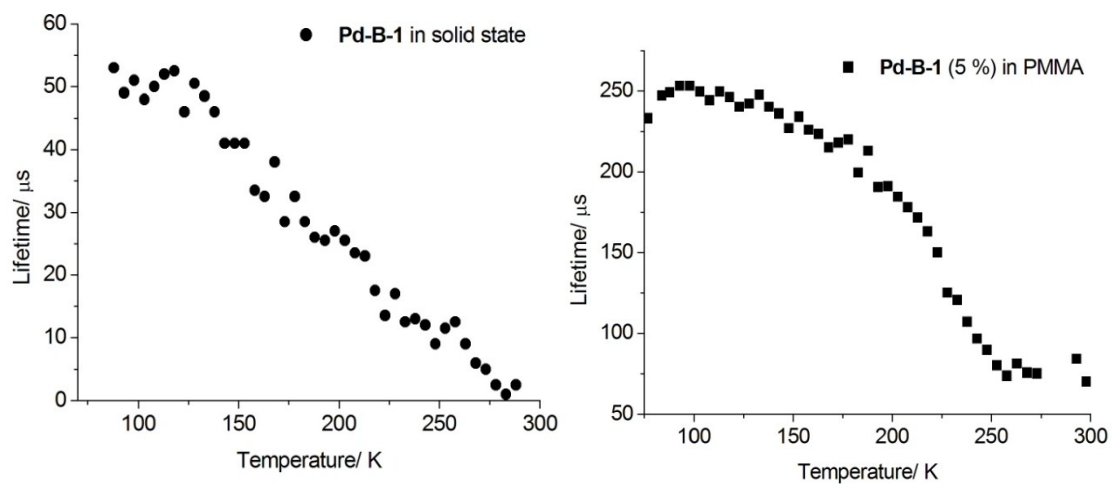

**Fig. S14** Plots of  $\tau_{obs}$  against temperature of **Pd-B-1** in the solid state (left) and in PMMA (5% dopant concentration) (right).



| MO                                                                                        | Pd | Phenyl<br>ring of<br>N <sup>+</sup> C | Pyridine<br>ring of<br>N <sup>+</sup> C |
|-------------------------------------------------------------------------------------------|----|---------------------------------------|-----------------------------------------|
| 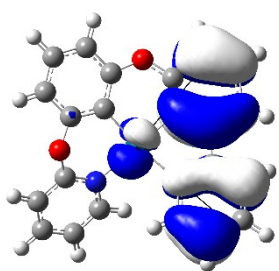<br>H-1  | 13 | 53                                    | 33                                      |
| <br>LUMO | 5  | 38                                    | 53                                      |

  


**Fig. S15** Relevant MO surfaces for the  $T_1$  excited state of the **Pd-B-2**. Top: H-1; bottom: LUMO. The values are the % contribution of the moiety to the MO.

| MO                                                                                  | Pd | Phenyl<br>ring of<br>N <sup>^</sup> C | Pyridine<br>ring of<br>N <sup>^</sup> C | Phenyl<br>ring of N-<br>Flu-C | Spiro-fluorene<br>moiety |
|-------------------------------------------------------------------------------------|----|---------------------------------------|-----------------------------------------|-------------------------------|--------------------------|
| 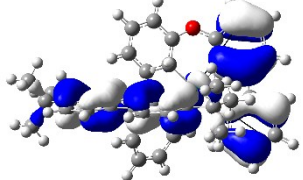   | 7  | 33                                    | 19                                      | 1                             | 39                       |
| H-2                                                                                 | 8  | 21                                    | 13                                      | 7                             | 51                       |
|    | 12 | 30                                    | 1                                       | 38                            | 1                        |
| H-1                                                                                 | 12 | 30                                    | 1                                       | 38                            | 1                        |
|   | 4  | 38                                    | 53                                      | 1                             | 0                        |
| HOMO                                                                                | 4  | 38                                    | 53                                      | 1                             | 0                        |
|  |    |                                       |                                         |                               |                          |
| LUMO                                                                                |    |                                       |                                         |                               |                          |

  



**Fig. S16** Relevant MO surfaces for the  $T_1$  excited state of the **Pd-B-1**. From top to bottom: H-2, H-1, HOMO, and LUMO. The values are the % contribution of the moiety to the MO.

| MO                                                                                  | Pd | Py-A | Ph | Py-B | O-Ph | N-Ph |
|-------------------------------------------------------------------------------------|----|------|----|------|------|------|
| 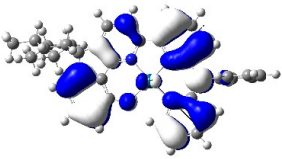   | 2  | 19   | 30 | 8    | 25   | 16   |
| H-2                                                                                 | 15 | 7    | 28 | 24   | 18   | 7    |
|    | 3  | 1    | 5  | 14   | 75   | 1    |
| H-1                                                                                 | 4  | 6    | 38 | 49   | 2    | 0    |
| HOMO                                                                                |    |      |    |      |      |      |
|  |    |      |    |      |      |      |
| LUMO                                                                                |    |      |    |      |      |      |

  


**Fig. S17** Relevant MO surfaces for the  $T_1$  excited state of the **Pd-N-1** complex. From top to bottom: H-2, H-1, HOMO, and LUMO. The values are the % contribution of the moiety to the MO.

**Table S4** Huang-Rhys factor for the normal modes with frequencies in the range  $1500 < \omega_i \leq 1700 \text{ cm}^{-1}$  and the estimated non-radiative decay rates  $k_{nr}$  of the lowest energy triplet excited state for the complexes **Pd-B-1**, **Pd-B-2**, and **Pd-N-1**

|                          | <b>Pd-B-1</b>      | <b>Pd-B-2</b>      | <b>Pd-N-1</b>      |
|--------------------------|--------------------|--------------------|--------------------|
| $\Sigma S_i$             | 0.98               | 1.02               | 0.89               |
| $k_{nr} / \text{s}^{-1}$ | $6.38 \times 10^3$ | $1.42 \times 10^4$ | $1.77 \times 10^3$ |

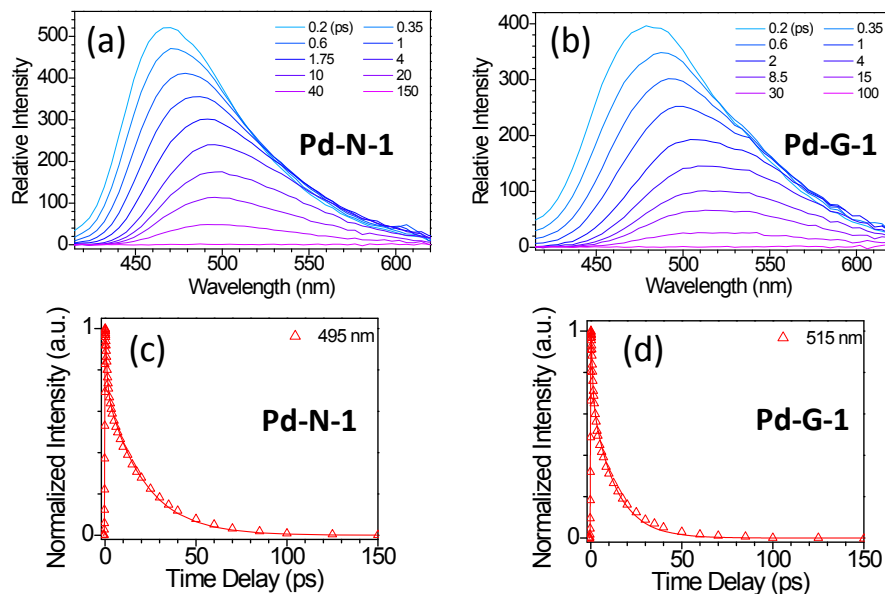

**Fig. S18** (a, b) Temporal evolution of fs-TRF and (c, d) experimental ( $\Delta$ ) and fitted (line) kinetic decays of fs-TRF obtained for (a,c) **Pd-N-1** and (b,d) **Pd-G-1** in  $\text{CH}_2\text{Cl}_2$  with excitation at 300 nm wavelength.

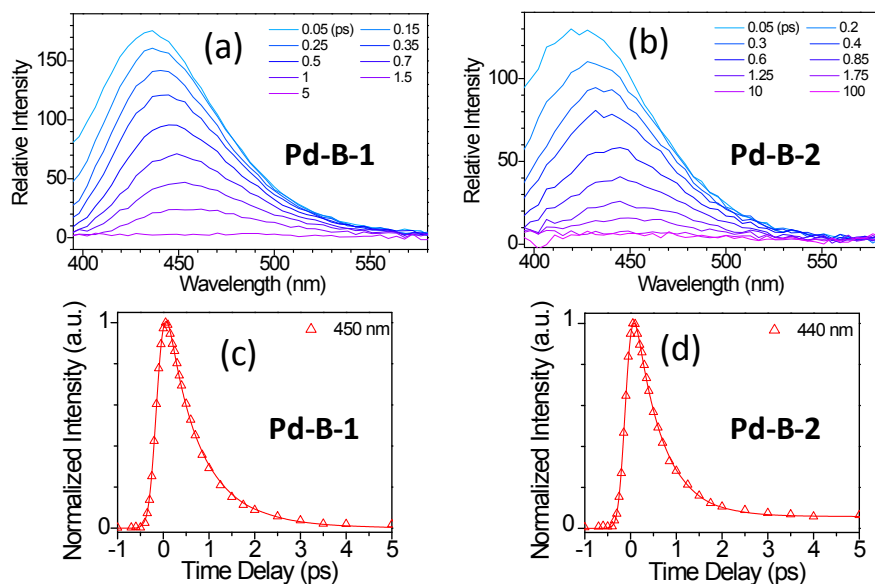

**Fig. S19**(a, b) Temporal evolution of fs-TRF and (c, d) experimental ( $\Delta$ ) and fitted (line) kinetic decays of fs-TRF obtained for (a,c) **Pd-B-1** and (b,d) **Pd-B-2** in  $\text{CH}_2\text{Cl}_2$  with excitation at 300 nm wavelength.

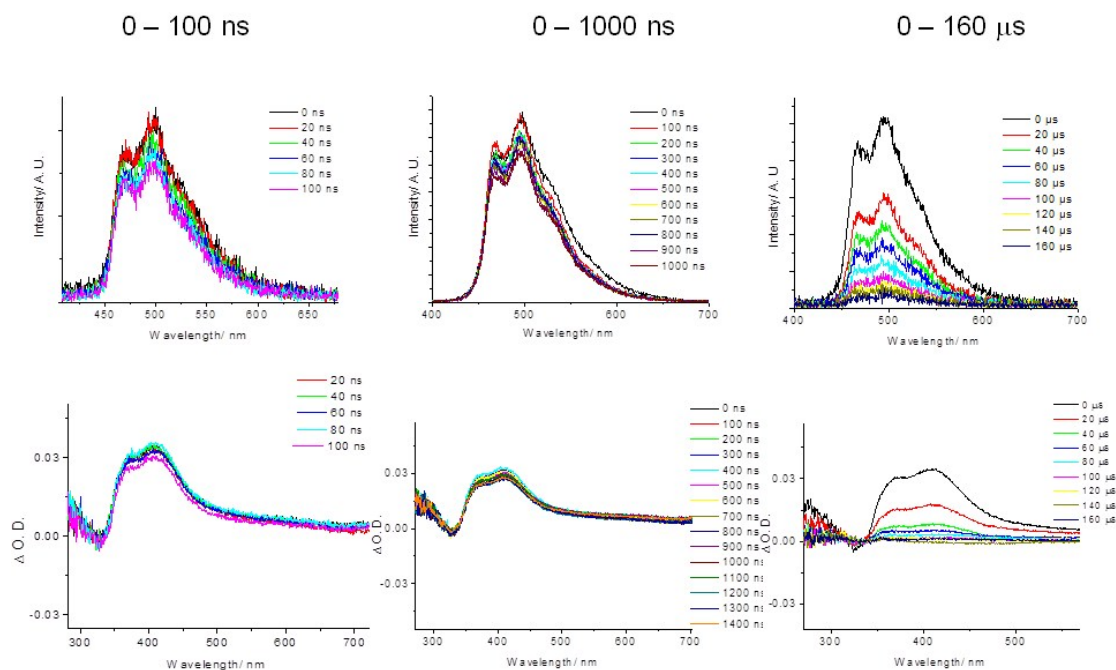

**Fig. S20** ns-TRE (upper panel) and ns-TA (lower panel) spectra of **Pd-B-1** in degassed  $\text{CH}_2\text{Cl}_2$  ( $5 \times 10^{-5} \text{ mol dm}^{-3}$ ) at room temperature.

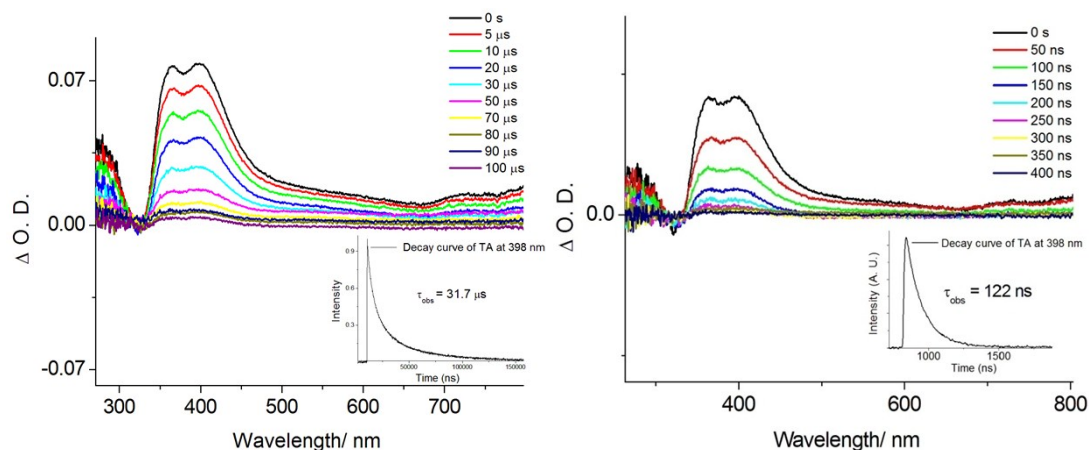

**Fig. S21** Left: Time resolved absorption difference spectra of **Pd-B-1** ( $5 \times 10^{-5} \text{ mol dm}^{-3}$ ) in degassed  $\text{CH}_3\text{CN}$  monitored at 0–100  $\mu\text{s}$ ; Right: Time resolved absorption difference spectra of **Pd-B-1** ( $5 \times 10^{-5} \text{ mol dm}^{-3}$ ) in non-degassed  $\text{CH}_3\text{CN}$  monitored at 0–400 ns. Insets in these two graphs show the decays of TA at 398 nm.

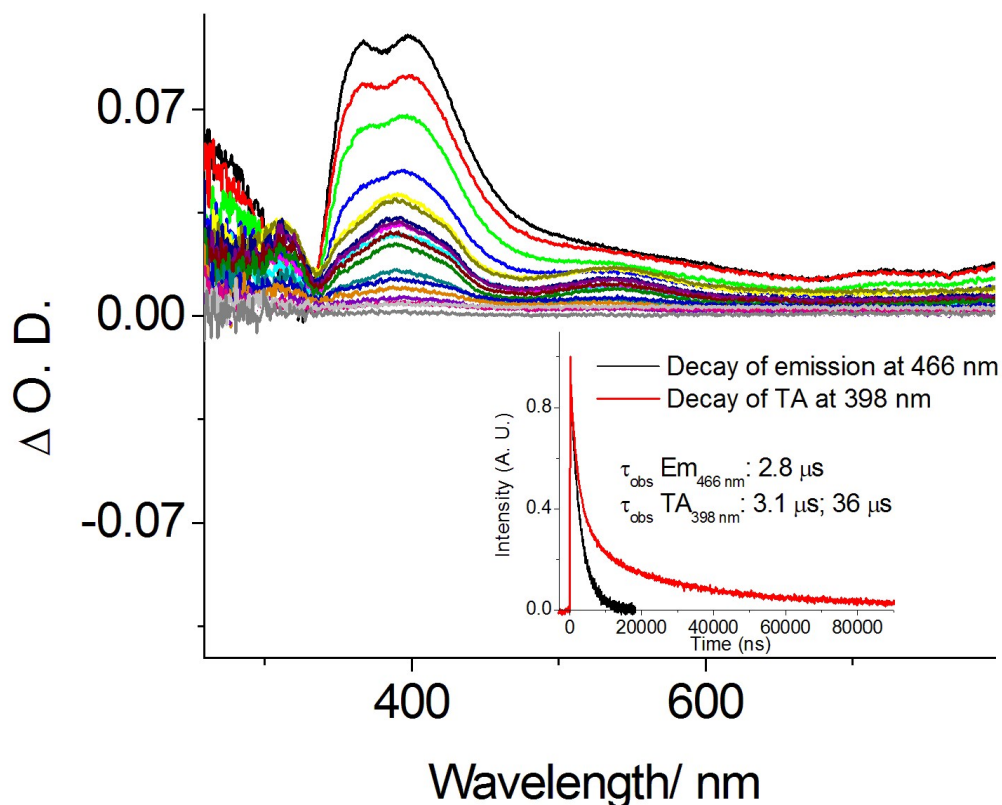

**Fig. S22** Time resolved absorption difference spectra of **Pd-B-1** ( $5 \times 10^{-5} \text{ mol dm}^{-3}$ ) and TMEDA ( $0.69 \text{ mol dm}^{-3}$ ) in degassed  $\text{CH}_3\text{CN}$  monitored at 0–100  $\mu\text{s}$ . Inset shows the decay of emission at 466 nm (black) and TA at 398 nm (red).

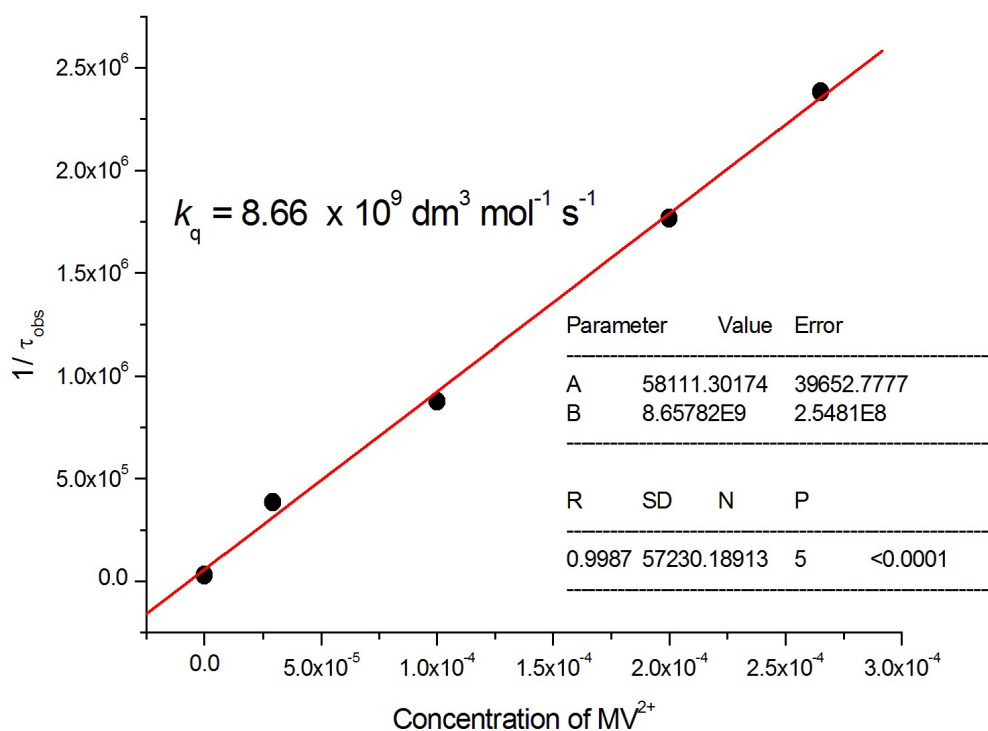

**Fig. S23** Stern-Volmer plot of the quenching of **Pd-B-1** at 466 nm by  $\text{MV}^{2+}$ .

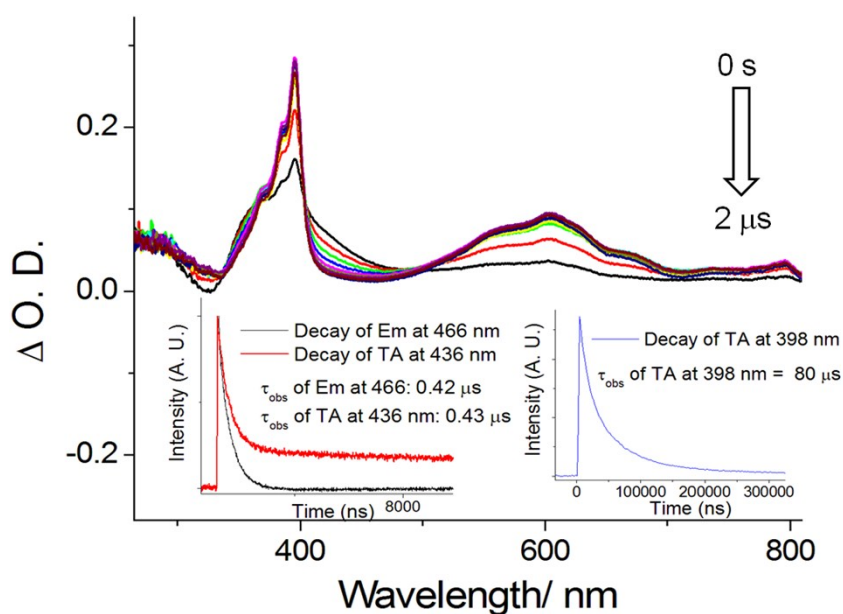

**Fig. S24** Time resolved absorption difference spectra of **Pd-B-1** ( $5 \times 10^{-5}$  mol dm $^{-3}$ ) and MV(PF $_6$ ) $_2$  ( $2.5 \times 10^{-4}$  mol dm $^{-3}$ ) in CH $_3$ CN monitored at 0–2  $\mu$ s. Insets show the decays of emission at 466 nm (black), TA at 436 nm (red) and TA at 398 (blue).

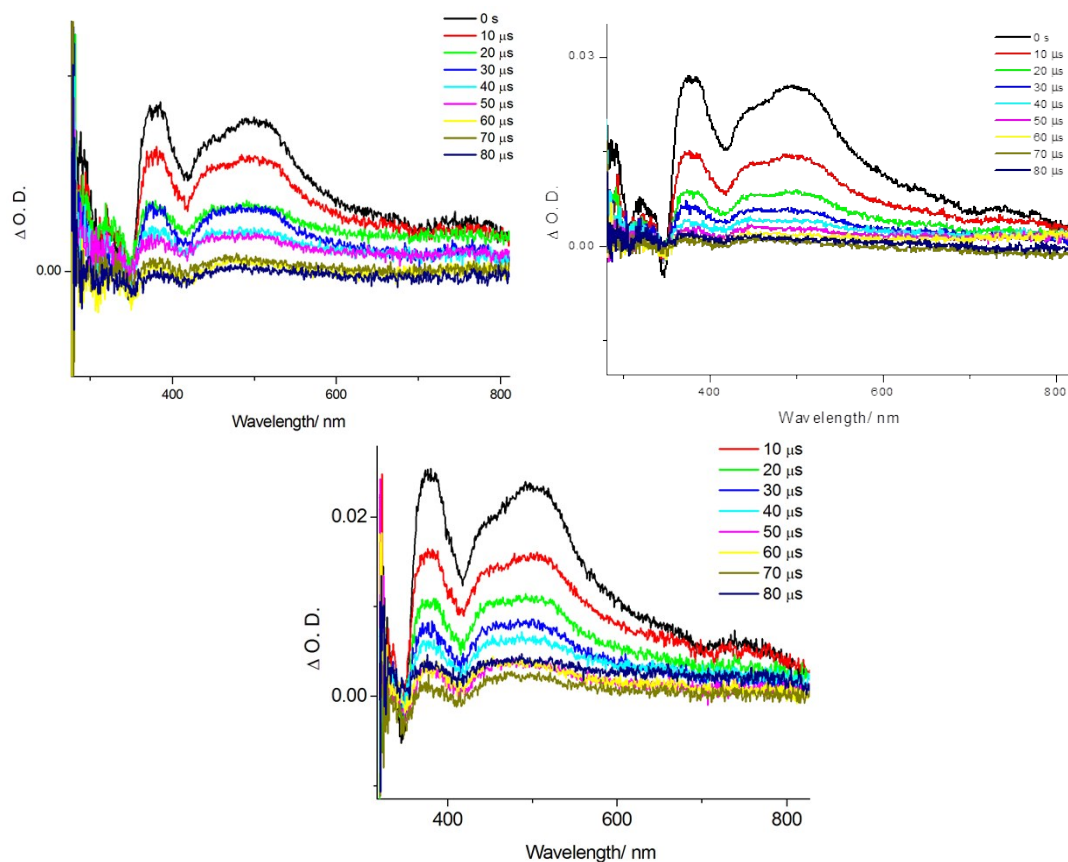

**Fig. S25** Top left: time-resolved absorption difference spectra of **Pd-N-1** ( $5 \times 10^{-5}$  mol dm $^{-3}$ ) in degassed CH $_3$ CN monitored at 0–80  $\mu$ s; Top right: time-resolved

absorption difference spectra of **Pd-N-1** ( $5 \times 10^{-5}$  mol dm $^{-3}$ ) and *i*PrNEt (1.15 mol dm $^{-3}$ ) in degassed CH $_3$ CN monitored at 0–80  $\mu$ s; Bottom: time-resolved absorption difference spectra of **Pd-N-1** ( $5 \times 10^{-5}$  mol dm $^{-3}$ ) and substrate **E $_1$**  ( $5 \times 10^{-2}$  mol dm $^{-3}$ ) in degassed CH $_3$ CN monitored at 0–80  $\mu$ s.

**Table S5** Reason for the absence of charge transfer reactions between substrate **E $_1$**  and **Pd-B-1/Pd-N-1** in excited state

|               | $E_{pa}$ (V) | $E_{1/2}^{red}$ (V) | $E_{0-0}$ (eV) | $E(M^*/M^{-1})$ (V) | $E(M^+/M^*)$ (V) |
|---------------|--------------|---------------------|----------------|---------------------|------------------|
| <b>Pd-N-1</b> | 0.53         | −2.47               | 2.48           | 0.01                | −1.95            |
| <b>Pd-B-1</b> | 0.81         | −2.54               | 2.71           | 0.17                | −1.90            |
| <b>Pd-B-2</b> | 0.73         | −2.44               | 2.70           | 0.26                | −1.97            |
| <b>Pd-G-1</b> | 0.53         | −2.24               | 2.61           | 0.37                | −2.08            |

Substrate **E $_1$**  oxidizes at the potential +1.11 V and reduces at the potential of −2.95 V.

*Imaginary cases:*

Case 1: **E $_1$**  were oxidized by **Pd-N-1** in excited state. Driving force = − 1.1 V;

Case 2: **E $_1$**  were reduced by **Pd-N-1** in excited state. Driving force = − 1 V;

Case 3: **E $_1$**  were oxidized by **Pd-B-1** in excited state. Driving force = −0.94 V;

Case 4: **E $_1$**  were reduced by **Pd-B-1** in excited state. Driving force = − 1.05 V;

Therefore the charge transfer reactions between **E $_1$**  and **Pd-N-1/Pd-B-1** are highly thermodynamically unfavourable.

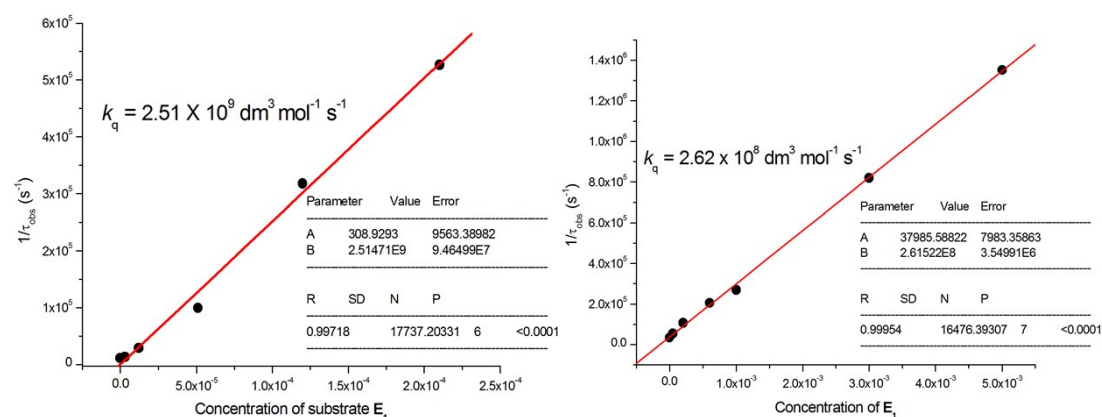

**Fig. S26** Left: Stern-Volmer plot of quenching of **Pd-B-1** at 466 nm by substrate **E $_1$** ; Right: Stern-Volmer plot of quenching of **Pd-N-1** at 515 nm by substrate **E $_1$** .



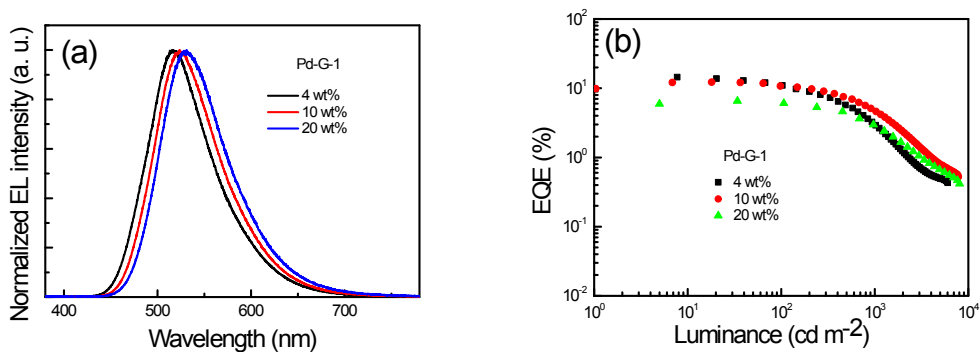

**Fig. S27.** (a) Normalized EL spectra and (b) external quantum efficiency-luminance characteristics of OLEDs with **Pd-G-1** at the dopant concentrations of 4, 10 and 20 wt%.

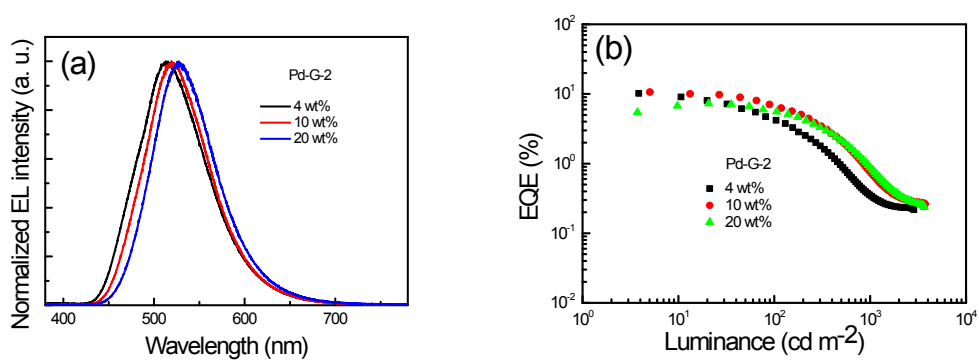

**Fig. S28.** (a) Normalized EL spectra and (b) external quantum efficiency-luminance characteristics of OLEDs with **Pd-G-2** at the dopant concentrations of 4, 10 and 20 wt%.

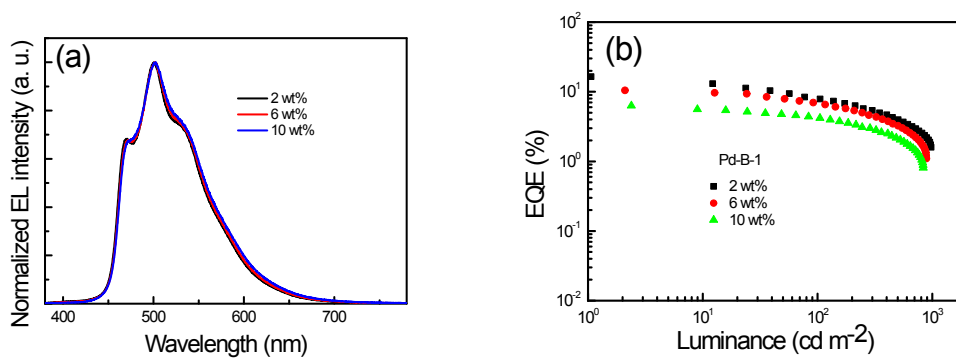

**Fig. S29.** (a) Normalized EL spectra and (b) external quantum efficiency-luminance characteristics of OLEDs with **Pd-B-1** at the dopant concentrations of 2, 6 and 10 wt%.

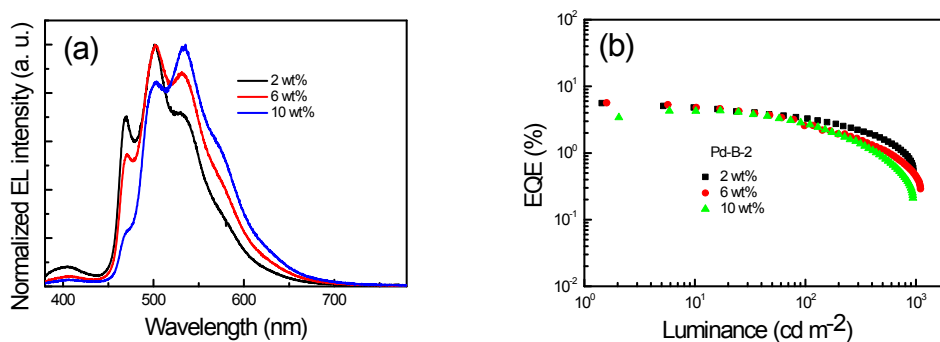

**Fig. S30.** (a) Normalized EL spectra and (b) external quantum efficiency-luminance characteristics of OLEDs with **Pd-B-2** at the dopant concentrations of 2, 6 and 10 wt%.

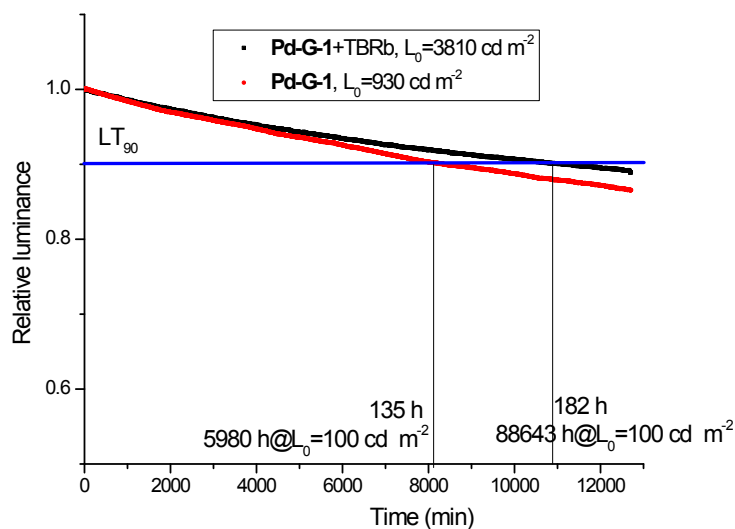

**Fig. S31** Device lifetime ( $T_{90}$ ) of the OLED with **Pd-G-1** as emitter as well as PSF-OLED with **Pd-G-1** as phosphorescent sensitizer and TBRb as fluorescent emitter.

### Synthesis of ligand precursors, ligands and metal complexes

The syntheses of the ligand of **Pd-G-1**<sup>11</sup>, and the complex **Pd-G-2** and its ligand<sup>10</sup> were reported in our previous publications. The ligand of **Pd-B-2** was prepared according to the literature.<sup>12</sup>

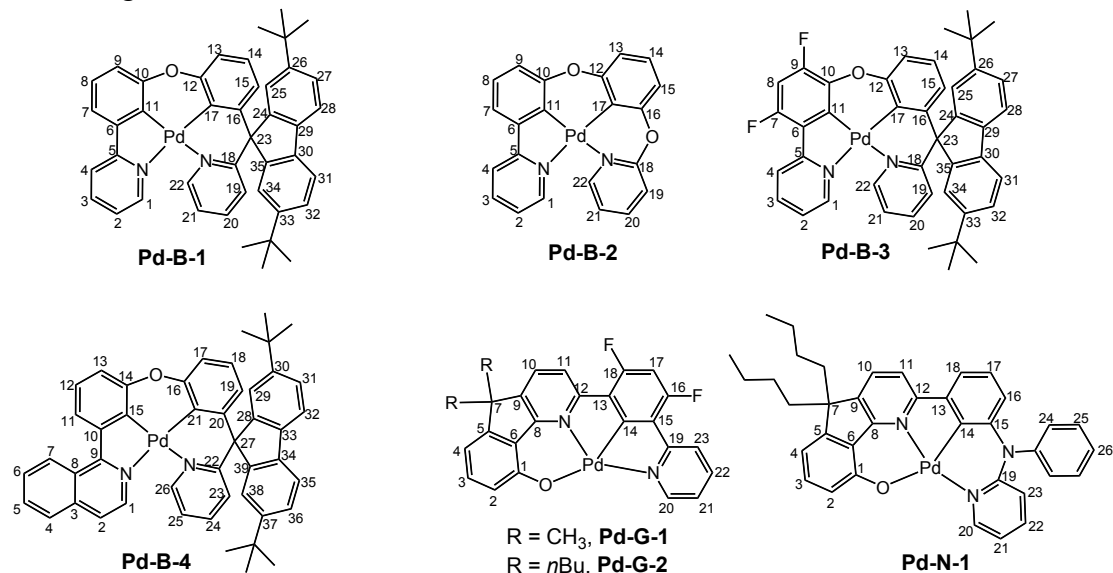

Atomic numbering of the seven complexes

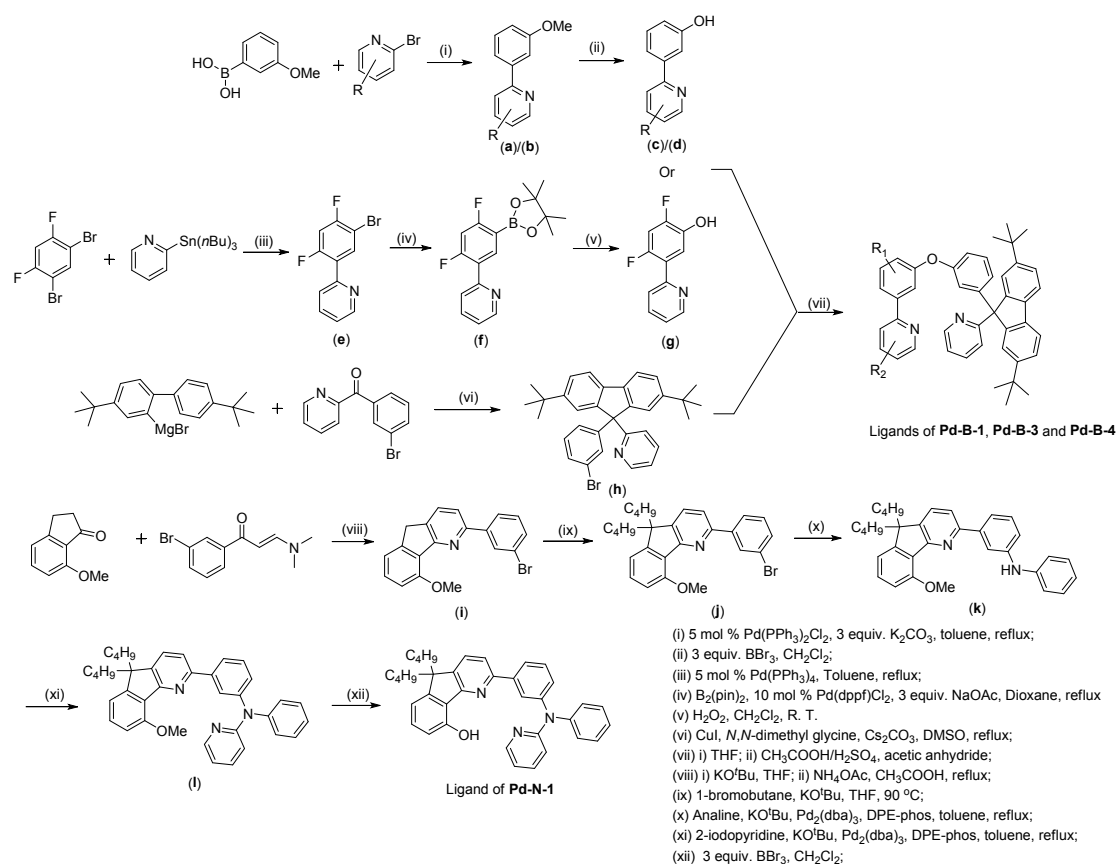

### Part 1. Synthesis of ligands precursors

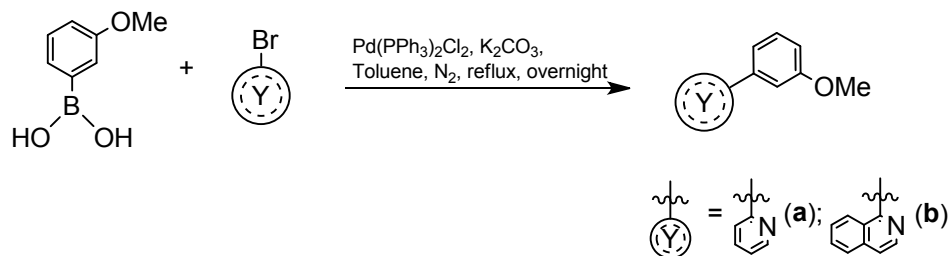

A flask was charged with Pd(PPh<sub>3</sub>)<sub>2</sub>Cl<sub>2</sub> (5 mol%), K<sub>2</sub>CO<sub>3</sub> (3.0 equiv.), 3-methoxyphenylboronic acid (1.0 equiv.), 2-bromopyridine/1-bromoisoquinoline (1 equiv.) and 100 mL of anhydrous toluene under nitrogen atmosphere. The reaction mixture was heated to reflux for 20 hours. After cooling down to ambient temperature, the mixture was diluted with dichloromethane and washed with 30 mL water three times. The combined organic extracts were dried over anhydrous MgSO<sub>4</sub>, concentrated under reduced pressure and the resulting residue was purified by flash chromatography on silica gel to provide the desired product.

(a):<sup>15</sup> Prepared from 3-methoxyphenylboronic acid (5.0 g, 32.9 mmol) and 2-bromopyridine (3.1 mL, 32.9 mmol); Yellow oil; Isolated yield: 5.2 g (85%); <sup>1</sup>H NMR (400 MHz, CDCl<sub>3</sub>, 25 °C): δ = 8.68 (d, *J* = 4.5 Hz, 1H), 7.76–7.70 (m, 2H),

7.58 (s, 1H), 7.54 (d,  $J = 7.7$  Hz, 1H), 7.38 (t,  $J = 8.0$  Hz, 1H), 7.26–7.21 (m, 1H), 6.96 (d,  $J = 8.1$  Hz, 1H), 3.89 (s, 3H).

**(b)**:<sup>16</sup> Prepared from 3-methoxyphenylboronic acid (4.7 g, 30.1 mmol) and 1-bromoisoquinoline (6.3 g, 30.1 mmol); Yellow oil; Isolated yield: 6.5 g (91%); <sup>1</sup>H NMR (300 MHz, CDCl<sub>3</sub>, 25 °C):  $\delta = 8.59$  (d,  $J = 5.7$  Hz, 1H), 8.11 (d,  $J = 8.5$  Hz, 1H), 7.83 (d,  $J = 8.2$  Hz, 1H), 7.67–7.60 (m, 2H), 7.52–7.39 (m, 2H), 7.27–7.24 (m, 2H), 7.04 (d,  $J = 8.4$  Hz, 1H), 3.85 (s, 3H).

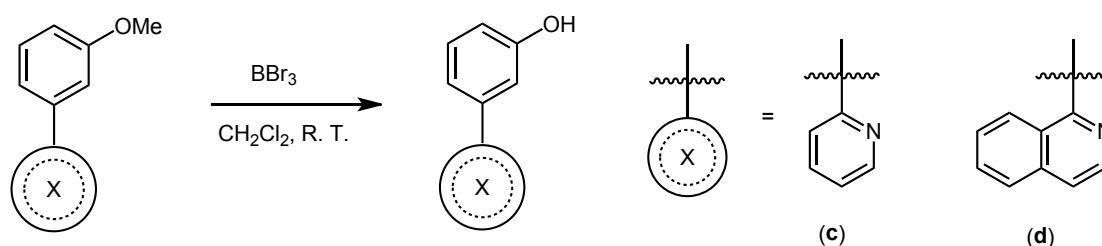

To a solution of aryl methyl ether (1.0 equiv.) in 30 mL of dry dichloromethane, BBr<sub>3</sub> (1.0 mol dm<sup>-3</sup> in dichloromethane, 3 equiv.) was slowly added under ice bath. The mixture was allowed to stir at room temperature for 2 hours. The crude mixture was slowly poured into crushed ice and neutralized with saturated Na<sub>2</sub>CO<sub>3</sub> solution. The organic layer was washed with water twice and extracted with dichloromethane. The solvent was removed under reduced pressure. The crude was purified by flash column chromatography on silica gel using *n*-hexane/ethyl acetate (7: 3 v/v) as eluent to provide the product. Recrystallization from *n*-hexane/diethyl ether mixture gave **(c)**/**(d)** as white solids.

**(c)**: Prepared from **(a)** (1.5 g, 8.1 mmol); White solid; Isolated yield: 1.0 g (73%); <sup>1</sup>H NMR (400 MHz, CDCl<sub>3</sub>, 25 °C):  $\delta = 8.68$  (d,  $J = 4.2$  Hz, 1H), 7.77 (t,  $J = 7.2$  Hz, 1H), 7.70 (d,  $J = 7.9$  Hz, 1H), 7.57 (s, 1H), 7.46 (d,  $J = 7.7$  Hz, 1H), 7.34 (t,  $J = 7.9$  Hz, 1H), 7.25 (s, 1H), 6.90 (d,  $J = 8.0$  Hz, 1H), 6.03 (s, -OH).

**(d)**: Prepared from **(b)** (4.0 g, 17.0 mmol); White solid; Isolated yield: 3.2 g (84%); <sup>1</sup>H NMR (400 MHz, CD<sub>3</sub>OD, 25 °C):  $\delta = 8.45$  (d,  $J = 5.9$  Hz, 1H), 8.09 (d,  $J = 8.5$  Hz, 1H), 8.03 (d,  $J = 8.2$  Hz, 1H), 7.88 (d,  $J = 8.9$  Hz, 1H), 7.83 (m, 1H), 7.65 (t,  $J = 4.5$  Hz, 1H), 7.39 (t,  $J = 4.1$  Hz, 1H), 7.09–6.99 (m, 3H).

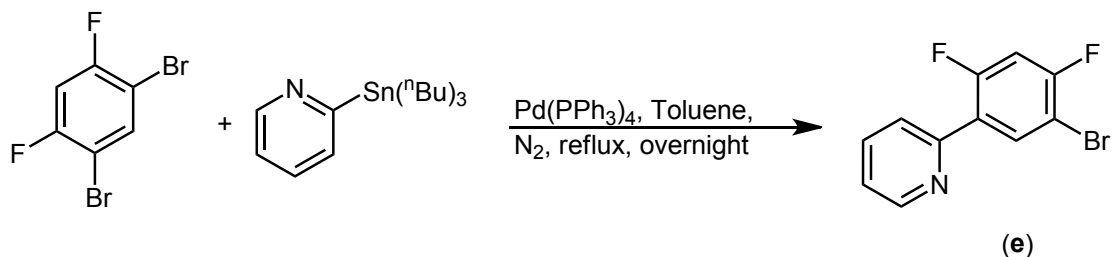

A flask was charged with Pd(PPh<sub>3</sub>)<sub>2</sub>Cl<sub>2</sub> (1.3 g, 1.8 mmol, 5 mol%), 1,5-dibromo-2,4-difluorobenzene (10 g, 36.8 mmol, 1.0 equiv.) and 2-(tributylstannyl)pyridine (11.9 mL, 36.8 mmol, 1.0 equiv.). The flask was evacuated and backfilled with nitrogen. 80 mL of anhydrous toluene was added under nitrogen atmosphere and the mixture was heated to reflux overnight. The crude mixture was filtered through a small portion of celite and then concentrated under reduced pressure. The crude product was purified by flash chromatography on silica gel using *n*-hexane/ethyl acetate (15:1 v/v) as eluent to give the product as a yellow solid.

(e) Isolated yield: 7.4 g (75%); <sup>1</sup>H NMR (400 MHz, CDCl<sub>3</sub>, 25 °C): δ = 8.63 (d, *J* = 4.8 Hz, 1H), 8.21 (t, *J* = 8.0 Hz, 1H), 7.68 (s, 2H), 7.25–7.19 (m, 1H), 6.91 (t, *J* = 9.4 Hz, 1H); <sup>19</sup>F NMR (376 MHz, CDCl<sub>3</sub>, 25 °C): δ = -102.62, -113.78.

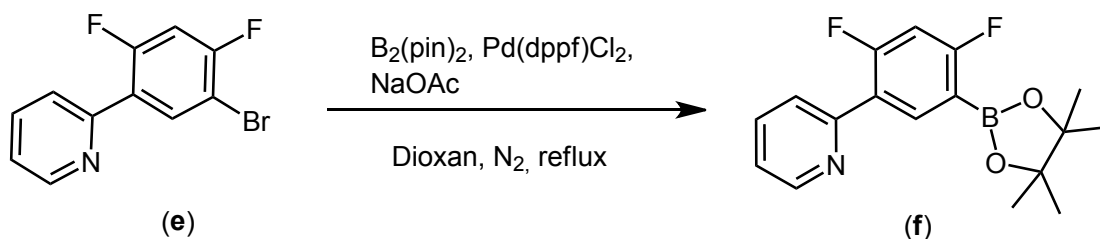

A flask was charged with Pd(dppf)Cl<sub>2</sub> (2.0 g, 2.5 mmol, 10 mol%), NaOAc (7.3 g, 73.6 mmol, 3.0 equiv.), bis(pinacolato)diboron (9.5 g, 36.8 mmol, 1.5 equiv.) and compound (e) (6.6 g, 24.5 mmol, 1.0 equiv.). The flask was evacuated and backfilled with nitrogen. 100 mL of anhydrous 1,4-dioxane was added under nitrogen atmosphere and the mixture was heated to reflux overnight. The crude mixture was filtered through a small portion of celite and then concentrated under reduced pressure. The crude product was purified by flash chromatography on a silica gel column using *n*-hexane/ethyl acetate (10:1 v/v) as eluent to give the product as a pale yellow solid.

(f): Isolated yield: 4.7 g (60%); <sup>1</sup>H NMR (400 MHz, CDCl<sub>3</sub>, 25 °C): δ = 8.72 (d, *J* = 4.6 Hz, 1H), 8.34 (t, *J* = 8.2 Hz, 1H), 7.77–7.69 (m, 2H), 7.30–7.24 (m, 1H), 6.88 (t, *J* = 10.1 Hz, 1H), 1.60 (s, 12H); <sup>19</sup>F NMR (376 MHz, CDCl<sub>3</sub>, 25 °C): δ = -98.41, -108.81.

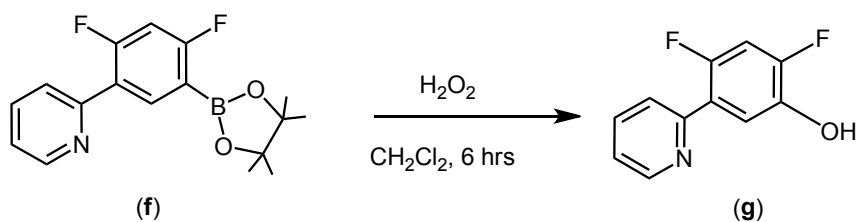

A flask was charged with compound **(f)** (2.0 g, 6.3 mmol, 1.0 equiv.); 40 mL of dichloromethane was added to dissolve the solid. 20 mL of 30% (w/w) (10 equiv.)  $\text{H}_2\text{O}_2$  was added and the mixture was allowed to stir at room temperature overnight. The crude product was diluted with dichloromethane and washed with 50 mL water three times. The combined organic extracts were dried over anhydrous  $\text{MgSO}_4$ , concentrated under reduced pressure. The resulting residue was purified by flash chromatography on a silica gel column using *n*-hexane/ethyl acetate (10 : 1 v/v) as eluent to give **(g)** as a pale brown solid.

**(g)**: Isolated yield: 0.8 g (65%);  $^1\text{H}$  NMR (400 MHz,  $\text{CDCl}_3$ , 25 °C):  $\delta$  = 8.69 (d,  $J$  = 4.7 Hz, 1H), 8.48 (s, -OH), 7.80 (t,  $J$  = 7.7 Hz, 1H), 7.72 (d,  $J$  = 8.1 Hz, 1H), 7.54 (t,  $J$  = 8.6 Hz, 1H), 7.31 (t,  $J$  = 6.2 Hz, 1H), 6.89 (t,  $J$  = 10.3 Hz, 1H);  $^{19}\text{F}$  NMR (376 MHz,  $\text{CDCl}_3$ , 25 °C):  $\delta$  = -124.41, -133.16.

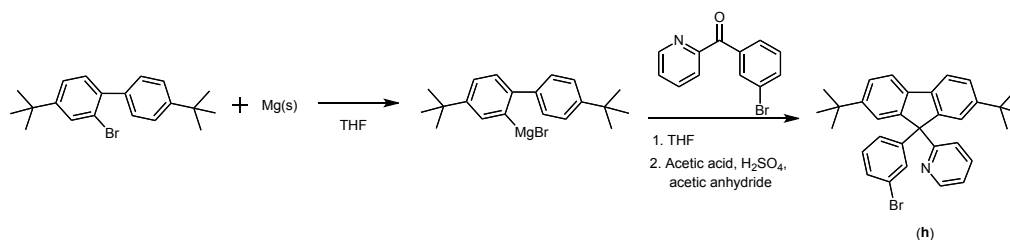

To a Schlenk flask equipped with a magnetic stirrer were added magnesium (0.6 g, 22.8 mmol, 1.2 equiv.) and 4,4'-di-*tert*-2-bromobiphenyl (7.9 g, 22.8 mmol, 1.2 equiv.). The flask was evacuated and subsequently filled with nitrogen for 3 times. 60 mL of anhydrous THF was added to the flask under nitrogen atmosphere. The reaction mixture was heated to reflux until complete consumption of magnesium (indicated by a clear solution) and was then cooled down to ambient temperature. A solution of 2-(3-bromobenzoyl)pyridine (5.0 g, 19.1 mmol, 1.0 equiv.) in 30 mL anhydrous THF was slowly added to the reaction mixture at room temperature under nitrogen atmosphere. The reaction mixture was heated to reflux overnight. After removing the solvent under reduced pressure, the crude product was poured into a solution containing 5.0 mL concentrated  $\text{H}_2\text{SO}_4$ , 5.0 mL acetic anhydride and 90 mL glacial acetic acid. The reaction mixture was stirred at 150 °C for 6 hours. The resultant mixture was poured into cool  $\text{CH}_3\text{OH}$ . After filtration and washing with cool methanol twice, the crude product was obtained as a pale yellow solid. Further

purification was done by flash chromatography on a silica gel column using hexane/ethyl acetate (15:1 v/v) as eluent to provide the desired product (**h**) as a pale yellow solid.

(**h**): Pale yellow solid; Yield: 7.9 g (81%).  $^1\text{H NMR}$  (300 MHz,  $\text{CDCl}_3$ , 25 °C):  $\delta$  = 7.60 (d,  $J$  = 1.7 Hz, 2H), 7.56 (d,  $J$  = 7.9 Hz, 2H), 7.32 (dd,  $J$  = 8.0 Hz,  $J$  = 1.8 Hz, 2H), 7.23–7.19 (m, 3H), 7.13–7.09 (m, 2H), 6.97 (dd,  $J$  = 5.8 Hz,  $J$  = 2.7 Hz, 1H), 6.90–6.87 (m, 2H), 1.26 (s, 18H).

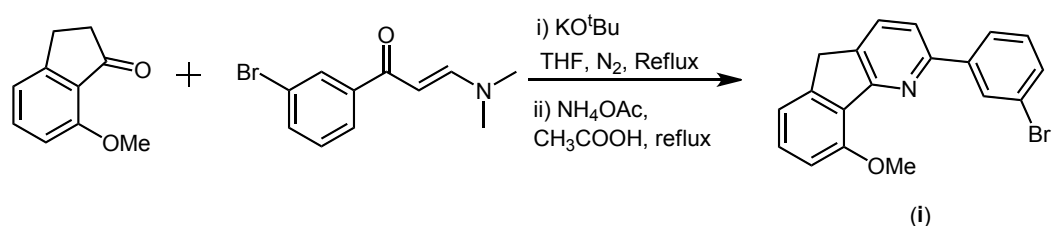

To a dry, nitrogen-flushed flask was charged with 7-methoxy-2,3-dihydro-1H-inden-1-one (2.5 g, 15 mmol, 1.0 equiv.), 1-(3-bromophenyl)-3-(dimethylamino)prop-2-en-1-one (3.92 g, 15 mmol, 1.0 equiv.), potassium *tert*-butoxide (2.08 g, 18 mmol, 1.2 equiv.) and anhydrous THF. The mixture was stirred for 12 hours. Excess ammonium acetate (~25 g) and acetic acid (~50 mL) was added and the resultant mixture was reflux for 2 hours. After cooling to room temperature, the crude was extracted with  $\text{CHCl}_3$  (3  $\times$  20 mL). The combined organic layer was dried over anhydrous  $\text{MgSO}_4$ . After removal of the volatiles under reduced pressure, the crude was purified by flash column chromatography on a silica gel column using *n*-hexane/ethyl acetate (10:1 v/v), yielding (**i**) as yellow oil.

(**i**): Isolated yield: 3.80 g (70%);  $^1\text{H NMR}$  (400 MHz,  $\text{CDCl}_3$ , 25 °C):  $\delta$  = 8.35 (m, 1H), 8.12 (d,  $J$  = 8.1 Hz, 1H), 7.85 (d,  $J$  = 7.9 Hz, 1H), 7.61 (d,  $J$  = 7.9 Hz, 1H), 7.52 (d,  $J$  = 8.1 Hz, 1H), 7.35–7.40 (m, 2H), 7.20 (d,  $J$  = 7.5 Hz, 1H), 6.98 (d,  $J$  = 8.3 Hz, 1H), 4.12 (s, 3H,  $\text{OCH}_3$ ), 3.92 (s, 2H,  $-\text{CH}_2-$ ).

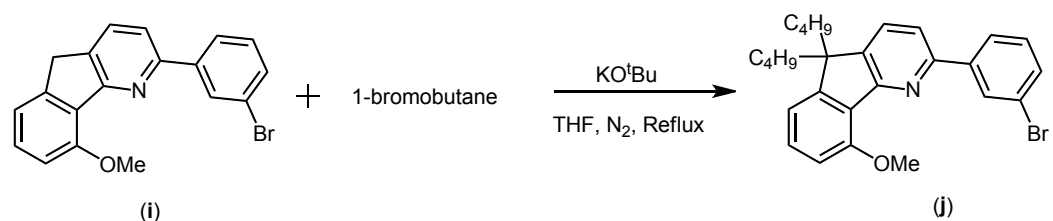

To a dry, nitrogen-flushed flask was charged with (**i**) (2.0 g, 5.68 mmol, 1.0 equiv.), 1-bromobutane (1.5 mL, 14 mmol, 2.5 equiv.) and anhydrous THF. The mixture was refluxed for 12 hours. The crude was extracted with  $\text{CHCl}_3$  (3  $\times$  20 mL). The



combined organic layer was dried over anhydrous  $\text{MgSO}_4$  (s). After removal of the volatiles under reduced pressure, the crude was purified by flash column chromatography on a silica gel column using *n*-hexane/ethyl acetate (10:1 v/v) as eluent. Compound (**j**) was obtained as a yellow solid.

(**j**): Isolated yield: 2.03 g (77%);  $^1\text{H}$  NMR (400 MHz,  $\text{CDCl}_3$ , 25 °C):  $\delta$  = 8.38 (s, 1H), 8.10 (d,  $J$  = 7.8 Hz, 1H), 7.63 (q,  $J$  = 7.9 Hz, 2H), 7.51 (d,  $J$  = 8.0 Hz, 1H), 7.32–7.42 (m, 2H), 7.00 (d,  $J$  = 7.6 Hz, 1H), 6.93 (d,  $J$  = 8.0 Hz, 1H), 4.11 (s, 3H,  $-\text{OCH}_3$ ), 1.96–2.01 (s, 4H,  $-\text{CH}_2\text{CH}_2\text{CH}_2\text{CH}_3$ ), 1.02–1.10 (m, 4H,  $-\text{CH}_2\text{CH}_2\text{CH}_2\text{CH}_3$ ), 0.57–0.67 (m, 10H,  $-\text{CH}_2\text{CH}_2\text{CH}_2\text{CH}_3$ ).

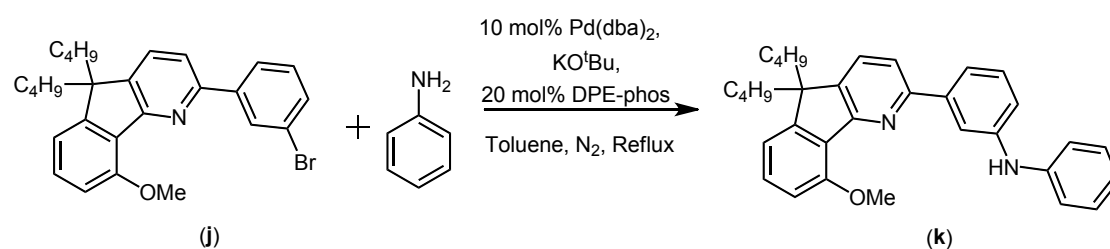

To a dry, nitrogen-flushed flask was charged with (**j**) (1.5 g, 3.23 mmol, 1.0 equiv.), potassium *tert*-butoxide (0.43 g, 3.88 mmol, 1.2 equiv.),  $\text{Pd}(\text{dba})_2$  (0.19 g, 0.32 mmol, 10 mol%), DPE-phos (0.35 g, 0.65 mmol, 20 mol%), aniline (0.29 mL, 3.23 mmol, 1.0 equiv.), and anhydrous toluene. The mixture was reflux for 24 hours. After cooling to room temperature, ethyl acetate was added, and the mixture was stirred for five minutes. The crude was extracted with  $\text{CHCl}_3$  (3 × 20 mL). The combined organic layer was dried over anhydrous  $\text{MgSO}_4$ . After removal of the volatiles under reduced pressure, the crude was purified by flash column chromatography on a silica gel column with *n*-hexane/ethyl acetate (10:1 v/v) as eluent. Compound (**k**) was obtained as a yellow solid.

(**k**): Isolated yield: 1.14 g (74%);  $^1\text{H}$  NMR (300 MHz,  $\text{CDCl}_3$ , 25 °C):  $\delta$  = 8.00 (s, 1H), 7.69 (d,  $J$  = 7.8 Hz, 1H), 7.62 (s, 2H), 7.33–7.41 (m, 3H), 7.30 (s, 1H), 7.13–7.15 (m, 3H), 6.90–7.00 (m, 3H), 5.82 (s, 1H), 4.05 (s, 3H,  $-\text{OCH}_3$ ), 1.95–2.00 (m, 4H,  $-\text{CH}_2\text{CH}_2\text{CH}_2\text{CH}_3$ ), 1.02–1.10 (m, 4H,  $-\text{CH}_2\text{CH}_2\text{CH}_2\text{CH}_3$ ), 0.57–0.67 (m, 10H,  $-\text{CH}_2\text{CH}_2\text{CH}_2\text{CH}_3$ ).

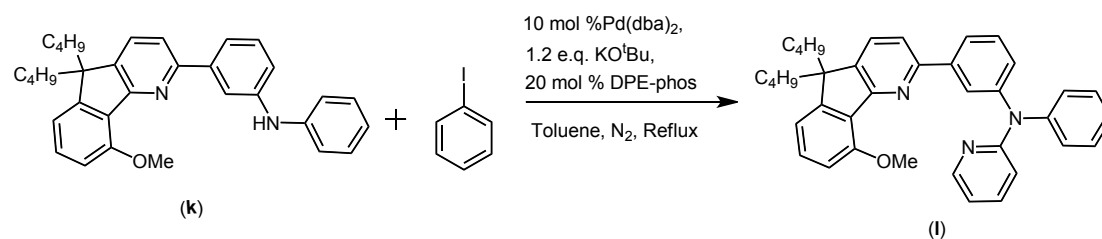

To a dry, nitrogen-flushed flask was charged with (**k**) (1.00 g, 2.10 mmol, 1.0 equiv.), potassium *tert*-butoxide (0.28 g, 2.52 mmol, 1.2 equiv.), Pd(dba)<sub>2</sub> (0.12 g, 0.21 mmol, 10 mol%), DPE-phos (0.23 g, 0.42 mmol, 20 mol%), 2-iodopyridine (0.19 mL, 2.10 mmol, 1.0 equiv.), and anhydrous toluene. The mixture was refluxed for 24 hours. After cooling to room temperature, ethyl acetate was added, and the mixture was stirred for five minutes. The crude was extracted with CHCl<sub>3</sub> (3 × 20 mL). The combined organic layer was dried over anhydrous MgSO<sub>4</sub>. After removal of the volatiles under reduced pressure, the crude was purified by flash column chromatography on a silica gel column using *n*-hexane/ethyl acetate (10:1 v/v) as eluent. Compound (**l**) was yielded as a yellow solid.

(**l**): Isolated yield: 0.81 g (70%); <sup>1</sup>H NMR (400 MHz, CDCl<sub>3</sub>, 25 °C): δ = 8.26 (d, *J* = 7.7 Hz, 1H), 8.05 (s, 1H), 7.93 (d, *J* = 7.9 Hz, 1H), 7.60 (d, *J* = 7.8 Hz, 1H), 7.55 (d, *J* = 8.0 Hz, 1H), 7.45 (q, *J* = 8.3 Hz, 2H), 7.30–7.38 (m, 4H), 7.20–7.23 (m, 2H), 7.11 (t, *J* = 7.0 Hz, 1H), 6.97 (d, *J* = 7.5 Hz, 1H), 6.85 (d, *J* = 8.0 Hz, 1H), 6.81 (d, *J* = 7.7 Hz, 1H), 6.78 (t, *J* = 6.5 Hz, 1H), 3.95 (s, 3H, –OCH<sub>3</sub>), 1.55–1.97 (m, 4H, –CH<sub>2</sub>CH<sub>2</sub>CH<sub>2</sub>CH<sub>3</sub>), 1.00–1.07 (m, 4H, –CH<sub>2</sub>CH<sub>2</sub>CH<sub>2</sub>CH<sub>3</sub>), 0.53–0.65 (m, 10H, –CH<sub>2</sub>CH<sub>2</sub>CH<sub>2</sub>CH<sub>3</sub>).

## Part 2. Synthesis of ligands of Pd-B-1, Pd-B-3, Pd-B-4 and Pd-N-1

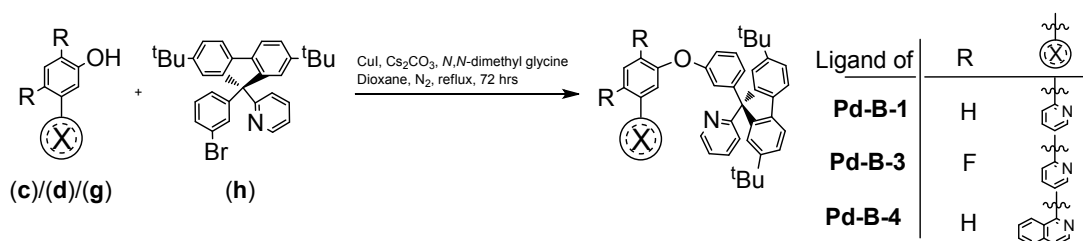

To a Schlenk flask equipped with a magnetic stirrer were added CuI (10 mol%), Cs<sub>2</sub>CO<sub>3</sub> (3.0 equiv.), *N,N*-dimethyl glycine (30 mol%), (**c**)/(**d**)/(**g**) (1.0 equiv.) and (**h**) (1.0 equiv.). The flask was evacuated and subsequently filled with nitrogen for 3 times. 100 mL of anhydrous DMSO was added to the flask under nitrogen atmosphere. The mixture was stirred at 150 °C for 3 days. The solid was filtered off and the filtrate was washed with deionized water for three times, extracted with dichloromethane and then dried over anhydrous MgSO<sub>4</sub>. The mixture was concentrated and purified by flash chromatography on a silica gel column using *n*-hexane/ethyl acetate mixture as eluent to give desired product as off-white solids.

Ligand of **Pd-B-1**: Prepared from (**c**) (0.5 g, 2.9 mmol) and (**h**) (1.5 g, 2.9 mmol); Off-white solid; Isolated yield: 0.71 g (41%); <sup>1</sup>H NMR (500 MHz, CDCl<sub>3</sub>, 25 °C): δ =

8.66 (d,  $J = 4.5$  Hz, 2H, H<sup>1</sup>, H<sup>23</sup>), 7.70 (dt,  $J = 2.2$  Hz,  $J = 7.1$  Hz, 1H, H<sup>3</sup>), 7.70 (d,  $J = 8.2$  Hz, 1H, H<sup>9</sup>), 7.67–7.58 (m, 6H, H<sup>28</sup>, H<sup>25</sup>, H<sup>17</sup>, H<sup>4</sup>), 7.42–7.32 (m, 4H, H<sup>27</sup>, H<sup>21</sup>, H<sup>8</sup>), 7.22 (dt,  $J = 2.1$  Hz,  $J = 6.5$  Hz, 1H, H<sup>2</sup>), 7.20 (t,  $J = 8.1$  Hz, 1H, H<sup>14</sup>), 7.15 (dt,  $J = 3.2$  Hz,  $J = 7.5$  Hz, 1H, H<sup>22</sup>), 6.96–6.92 (m, 2H, H<sup>20</sup>, H<sup>7</sup>), 6.84–6.79 (m, 3H, H<sup>15</sup>, H<sup>13</sup>, H<sup>11</sup>), 1.27 (s, 18H, <sup>t</sup>Bu); EI-MS(+ve,  $m/z$ ): 600 [M<sup>+</sup>].

Ligand of **Pd-B-3**: Prepared from (**g**) (1.0 g, 4.8 mmol) and (**h**) (2.5 g, 4.8 mmol); Off-white solid; Isolated yield: 1.9 g (61%); <sup>1</sup>H NMR (600 MHz, CDCl<sub>3</sub>, 25 °C):  $\delta = 8.64$  (d,  $J = 4.4$  Hz, 1H, H<sup>1</sup>), 8.64 (d,  $J = 6.2$  Hz, 1H, H<sup>23</sup>), 7.77–7.69 (m, 3H, H<sup>8</sup>, H<sup>4</sup>, H<sup>3</sup>), 7.61 (d,  $J = 8.0$  Hz, 2H, H<sup>28</sup>), 7.58 (s, 2H, H<sup>25</sup>), 7.40 (t,  $J = 7.5$  Hz, 1H, H<sup>21</sup>), 7.37 (d,  $J = 8.0$  Hz, 2H, H<sup>27</sup>), 7.22 (t,  $J = 5.6$  Hz, 1H, H<sup>2</sup>), 7.14 (t,  $J = 7.9$  Hz, 1H, H<sup>14</sup>), 7.07 (t,  $J = 5.2$  Hz, 1H, H<sup>22</sup>), 6.96–6.92(m, 2H, H<sup>20</sup>, H<sup>17</sup>), 6.79–6.74 (m, 3H, H<sup>15</sup>, H<sup>13</sup>, H<sup>11</sup>), 1.26 (s, 18H, <sup>t</sup>Bu); <sup>19</sup>F NMR (376 MHz, CDCl<sub>3</sub>, 25 °C):  $\delta = -115.36, -125.14$ ; EI-MS(+ve,  $m/z$ ): 636 [M<sup>+</sup>].

Ligand of **Pd-B-4**: Prepared from (**d**) (0.5 g, 2.3 mmol) and (**h**) (1.2 g, 2.3 mmol); Off-white solid; Isolated yield: 0.66 g (44%); <sup>1</sup>H NMR (600 MHz, CDCl<sub>3</sub>, 25 °C):  $\delta = 8.61$  (d,  $J = 4.8$  Hz, 1H, H<sup>27</sup>), 8.57 (d,  $J = 6.7$  Hz, 1H, H<sup>1</sup>), 8.06 (d,  $J = 8.5$  Hz, 1H, H<sup>7</sup>), 7.87 (d,  $J = 8.2$  Hz, 1H, H<sup>4</sup>), 7.68 (t,  $J = 7.1$  Hz, 1H, H<sup>5</sup>), 7.65–7.59 (m, 5H, H<sup>32</sup>, H<sup>29</sup>, H<sup>2</sup>), 7.52 (t,  $J = 7.2$  Hz, 1H, H<sup>6</sup>), 7.41–7.32 (m, 6H, H<sup>31</sup>, H<sup>25</sup>, H<sup>15</sup>, H<sup>12</sup>, H<sup>11</sup>), 7.17 (t,  $J = 7.9$  Hz, 1H, H<sup>18</sup>), 7.06–7.02 (m, 2H, H<sup>26</sup>, H<sup>13</sup>), 6.93–6.86 (m, 3H, H<sup>24</sup>, H<sup>21</sup>, H<sup>17</sup>), 6.77 (d,  $J = 7.1$  Hz, 1H, H<sup>19</sup>), 1.26 (s, 18H, <sup>t</sup>Bu); EI-MS(+ve,  $m/z$ ): 650 [M<sup>+</sup>].

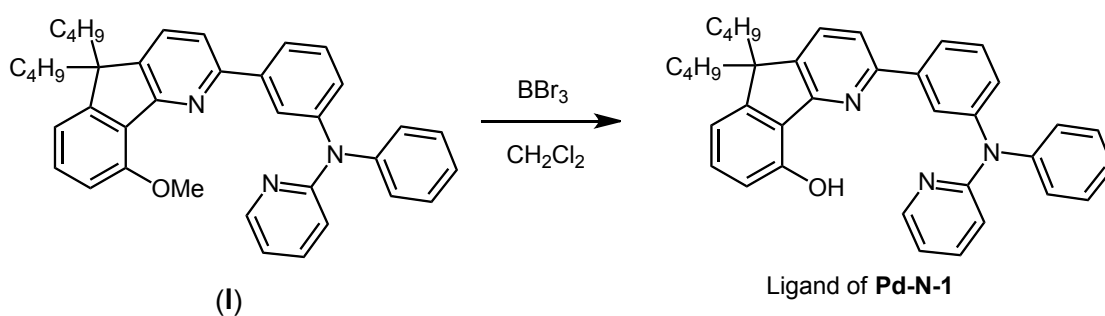

To a solution of (**I**) (0.75 g, 1.35 mmol, 1.0 equiv.) in CH<sub>2</sub>Cl<sub>2</sub> chilled in an ice bath was added BBr<sub>3</sub> (4.1 mL 1 mol dm<sup>-3</sup> BBr<sub>3</sub> solution in CH<sub>2</sub>Cl<sub>2</sub>, 4.06 mmol, 3.0 equiv.) dropwise. The reaction mixture was warmed to room temperature and stirred for 3 hours. A solution of Na<sub>2</sub>CO<sub>3</sub> (1 mol dm<sup>-3</sup> in H<sub>2</sub>O) was added dropwise until all the solids dissolved. The resultant mixture was extracted with CHCl<sub>3</sub> (3 × 20 mL). The combined organic layer was dried over anhydrous MgSO<sub>4</sub>. After removal of all the volatiles under reduced pressure, the crude was purified on a silica gel column using *n*-hexane/ethyl acetate (8:2 v/v) as eluent. The ligand of **Pd-N-1** was yielded as a pale

yellow solid.

Ligand of **Pd-N-1**: Isolated yield: 0.66 g (90%);  $^1\text{H NMR}$  (500 MHz,  $\text{CD}_2\text{Cl}_2$ , 25 °C):  $\delta = 9.17$  (s, 1H), 8.21 (d,  $J = 5.2$  Hz, 1H), 7.83 (s, 1H), 7.79 (d,  $J = 8.0$  Hz, 1H), 7.68 (d,  $J = 7.9$  Hz, 1H), 7.54 (d,  $J = 7.9$  Hz, 1H), 7.50 (t,  $J = 7.8$  Hz, 1H), 7.45 (t,  $J = 7.9$  Hz, 1H), 7.36 (t,  $J = 7.9$  Hz, 2H), 7.31 (t,  $J = 7.9$  Hz, 1H), 7.21–7.25 (m, 3H), 7.18 (t,  $J = 7.4$  Hz, 1H), 6.93 (d,  $J = 7.3$  Hz, 1H), 6.82–6.84 (m, 3H), 1.92–1.97 (m, 4H, – $\text{CH}_2\text{CH}_2\text{CH}_2\text{CH}_3$ ), 1.06–1.10 (m, 4H, – $\text{CH}_2\text{CH}_2\text{CH}_2\text{CH}_3$ ), 0.66–0.71 (m, 10H, – $\text{CH}_2\text{CH}_2\text{CH}_2\text{CH}_3$ ); EI-MS (+ve,  $m/z$ ): 539 [ $\text{M}^+$ ].

### Part 3. Synthesis of metal complexes

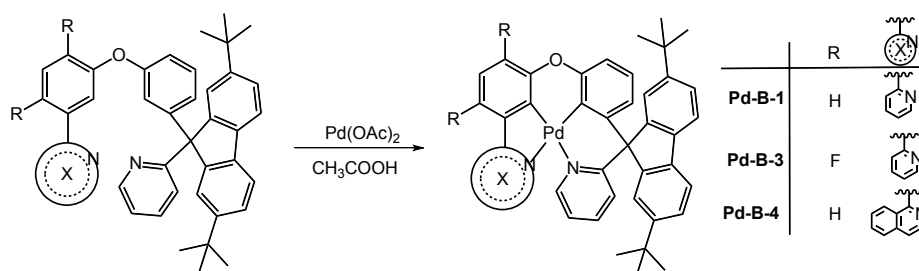

Ligand of **Pd-B-1**, **Pd-B-3** or **Pd-B-4**

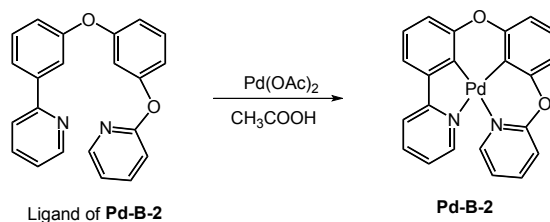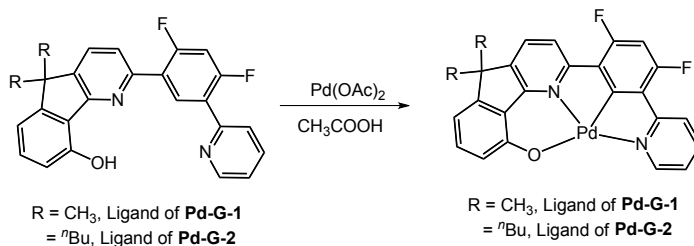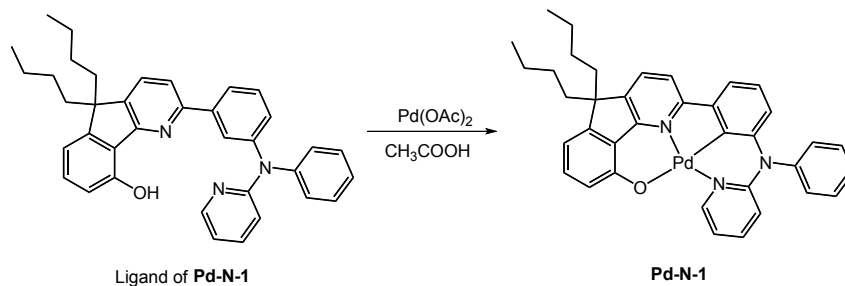

As shown in the above scheme, the ligand was mixed with 1.1 equiv. of  $\text{Pd}(\text{OAc})_2$  in glacial acetic acid (50 mL), and the reaction mixture was refluxed for 12 hours. After that, 50 mL dionized water was poured into the reaction mixture and the resultant

mixture was extracted with  $\text{CHCl}_3$  ( $3 \times 50$  mL). The combined organic layer was dried over anhydrous  $\text{MgSO}_4$ . The solvent was removed under reduced pressure. Purification was done by flash column chromatography on an alumina column using  $\text{CH}_2\text{Cl}_2$  or  $\text{CHCl}_3$  as eluent to give the product as yellow solids. **Pd-B-1**, **Pd-B-2**, **Pd-G-1** and **Pd-G-2** were further purified by sublimation at 280–300 °C under  $4 \times 10^{-5}$  Torr, and were harvested as pale yellow/yellow crystalline solids.

**Pd-B-1**: Prepared from the corresponding ligand (0.30 g, 0.50 mmol) and  $\text{Pd}(\text{OAc})_2$  (0.12 g, 0.55 mmol); Pale yellow crystalline solid; Isolated yield: 0.12 g (33%);  $^1\text{H}$  NMR (500 MHz,  $\text{CDCl}_3$ , 25 °C):  $\delta = 10.0$  (s, 1H,  $\text{H}^{25}$ ), 9.0 (d,  $J = 5.3$  Hz, 1H,  $\text{H}^{22}$ ), 8.11 (d,  $J = 5.2$  Hz, 1H,  $\text{H}^1$ ), 8.02 (d,  $J = 8.1$  Hz, 1H,  $\text{H}^4$ ), 7.87 (t,  $J = 7.5$  Hz, 1H,  $\text{H}^3$ ), 7.77 (s, 1H,  $\text{H}^{34}$ ), 7.52–7.58 (m, 5H,  $\text{H}^7$ ,  $\text{H}^9$ ,  $\text{H}^{20}$ ,  $\text{H}^{27}$ ,  $\text{H}^{28}$ ), 7.21–7.31 (m, 4H,  $\text{H}^8$ ,  $\text{H}^{21}$ ,  $\text{H}^{31}$ ,  $\text{H}^{32}$ ), 7.13–7.18 (m, 2H,  $\text{H}^2$ ,  $\text{H}^{15}$ ), 6.97 (d,  $J = 8.4$  Hz, 1H,  $\text{H}^{19}$ ), 6.84 (t,  $J = 7.8$  Hz, 1H,  $\text{H}^{14}$ ), 6.64 (d,  $J = 7.8$  Hz, 1H,  $\text{H}^{13}$ ), 1.39 (s, 9H,  $t\text{Bu}$ ), 0.76 (s, 9H,  $t\text{Bu}$ );  $^{13}\text{C}$  NMR (126 MHz,  $\text{CDCl}_3$ , 25°C):  $\delta = 165.1$ , 164.6, 162.9, 153.5, 153.0, 152.0, 150.5, 150.4, 147.9, 147.6, 143.5, 140.4, 137.9, 137.6, 131.2, 126.8, 126.7, 125.4, 125.2, 125.1, 124.8, 124.5, 123.9, 122.8, 122.1, 121.3, 119.7, 119.6, 118.9, 118.2, 116.9, 116.1, 71.1, 31.6, 31.0; FAB-MS(+ve,  $m/z$ ): 704 [ $\text{M}^+$ ]; Elemental analyses calcd (%) for  $\text{C}_{43}\text{H}_{38}\text{N}_2\text{OPd}$ : C 73.24, H 5.43, N 3.97. Found: C 73.23, H 5.38, N 3.99.

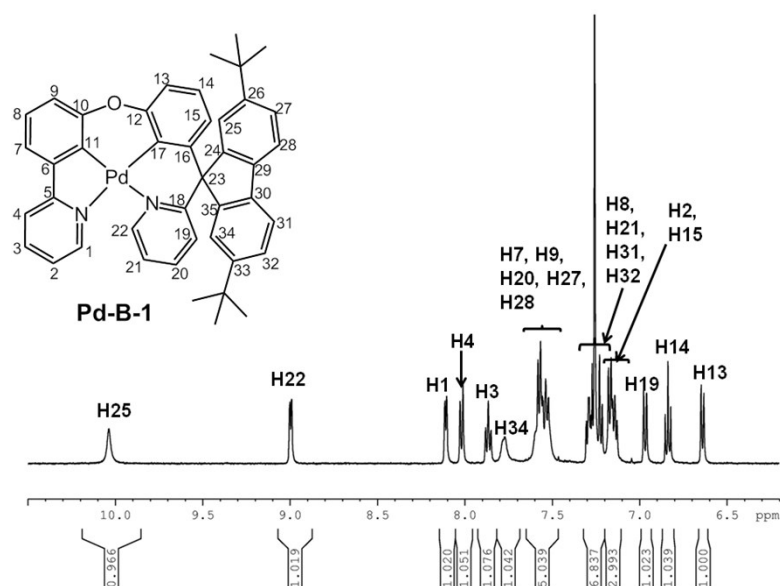

**Fig. S32**  $^1\text{H}$  NMR spectrum of **Pd-B-1** (500 MHz,  $\text{CDCl}_3$ , 298 K).

**Pd-B-2**: Prepared from the corresponding ligand (0.26 g, 0.76 mmol) and  $\text{Pd}(\text{OAc})_2$  (0.19 g, 0.84 mmol); Pale yellow crystalline solid; Isolated yield: 0.13 g (37%);  $^1\text{H}$  NMR (500 MHz,  $\text{CDCl}_3$ , 25 °C):  $\delta = 8.50$ –8.51 (m, 1H,  $\text{H}^{22}$ ), 8.34 (d,  $J = 4.7$  Hz, 1H,  $\text{H}^1$ ), 7.95 (d,  $J = 8.1$  Hz, 1H,  $\text{H}^4$ ), 7.91 (ddd,  $J = 1.9$  Hz, 7.2 Hz, 8.4 Hz, 1H,  $\text{H}^{21}$ ), 7.86

(ddd,  $J = 1.6$  Hz, 7.5 Hz, 8.1 Hz, 1H, H<sup>2</sup>), 7.52 (dd,  $J = 1.0$  Hz, 7.2 Hz, 1H, H<sup>7</sup>), 7.36 (d,  $J = 8.3$  Hz, 1H, H<sup>19</sup>), 7.21–7.28 (m, 4H, H<sup>3</sup>, H<sup>8</sup>, H<sup>9</sup>, H<sup>20</sup>), 7.13–7.19 (m, 2H, H<sup>14</sup>, H<sup>15</sup>), 6.95 (dd,  $J = 1.5$  Hz, 7.3 Hz, 1H, H<sup>13</sup>); <sup>13</sup>C NMR (126 MHz, CDCl<sub>3</sub>, 25 °C):  $\delta = 164.7, 160.7, 156.4, 153.4, 152.2, 147.9, 147.7, 147.7, 140.6, 138.1, 136.6, 125.7, 125.6, 122.3, 119.7, 119.6, 118.4, 117.7, 116.1, 115.3, 113.0, 110.8$ ; FAB-MS(+ve,  $m/z$ ): 444 [M<sup>+</sup>]; Elemental analyses calcd (%) for C<sub>22</sub>H<sub>14</sub>N<sub>2</sub>O<sub>2</sub>Pd: C 59.41, H 3.17, N 6.30. Found: C 59.21, H 3.32, N 6.29.

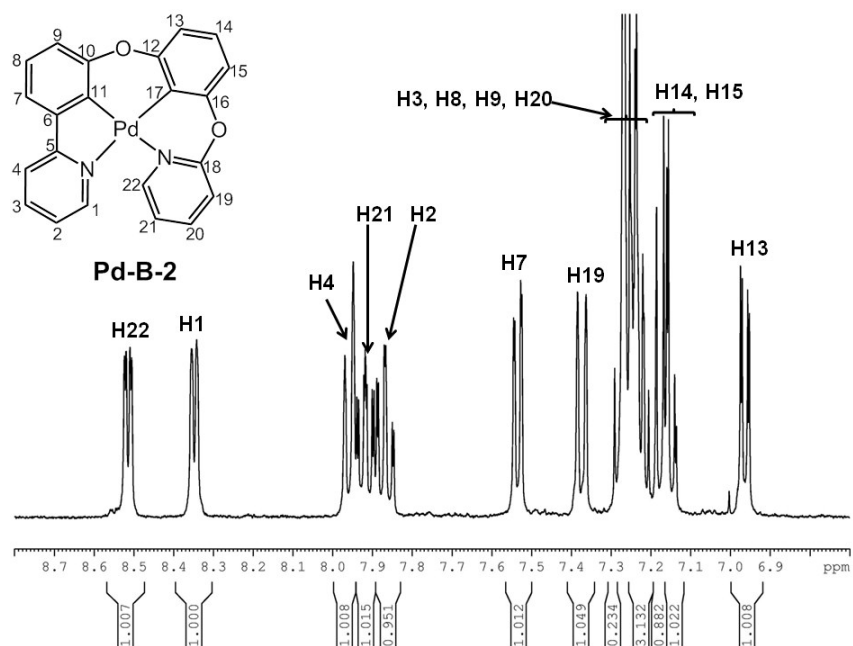

**Fig. S33** <sup>1</sup>H NMR spectrum of **Pd-B-2** (500 MHz, CDCl<sub>3</sub>, 298 K).

**Pd-B-3:** Prepared from the corresponding ligand (0.22 g, 0.35 mmol) and Pd(OAc)<sub>2</sub> (0.085 g, 0.38 mmol); Pale yellow solid; Isolated yield: 0.10 g (40%); <sup>1</sup>H NMR (500 MHz, CDCl<sub>3</sub>, 25 °C):  $\delta = 9.84$  (s, 1H, H<sup>25</sup>), 8.98 (dd,  $J = 1.35$  Hz, 5.5 Hz, 1H, H<sup>22</sup>), 8.30 (d,  $J = 8.3$  Hz, 1H, H<sup>4</sup>), 8.04 (dd,  $J = 1.0$  Hz, 5.4 Hz, 1H, H<sup>1</sup>), 7.87 (t,  $J = 7.6$  Hz, 1H, H<sup>3</sup>), 7.77 (d,  $J = 7.9$  Hz, 1H, H<sup>28</sup>), 7.59 (d,  $J = 7.7$  Hz, 1H, H<sup>27</sup>), 7.50–7.54 (m, 3H, H<sup>20</sup>, H<sup>32</sup>, H<sup>34</sup>), 7.21–7.25 (m, signals overlap with residue solvent peak, 2H, H<sup>13</sup>, H<sup>21</sup>), 7.16 (d,  $J = 7.6$  Hz, 1H, H<sup>31</sup>), 7.13 (ddd,  $J = 1.1$  Hz, 5.5 Hz, 6.9 Hz, 1H, H<sup>2</sup>), 6.93 (d,  $J = 8.4$  Hz, 1H, H<sup>19</sup>), 6.84 (t,  $J = 7.8$ , 1H, H<sup>14</sup>), 6.80 (t,  $J = 10.8$  Hz, 1H, H<sup>8</sup>), 6.62 (dd,  $J = 1.2$  Hz, 7.8 Hz, 1H, H<sup>15</sup>), 1.38 (s, 9H, <sup>t</sup>Bu), 0.73 (s, 9H, <sup>t</sup>Bu); <sup>13</sup>C NMR (126 MHz, CDCl<sub>3</sub>, 25 °C):  $\delta = 162.7, 161.9$  (d), 156.0 (d), 153.9 (d), 152.6, 152.5, 150.7, 150.6, 150.5, 150.4, 149.7, 147.8, 145.5, 143.1, 139.3, 138.4, 137.8, 136.4, 131.0, 127.9, 126.6, 125.3, 124.9, 124.7, 123.6, 123.5, 123.3, 123.0, 122.1, 121.5, 119.7, 119.0, 116.2, 101.4 (dd), 71.0, 31.6, 30.9; <sup>19</sup>F NMR (376 MHz, CDCl<sub>3</sub>, 25 °C):  $\delta = -118.04, -126.75$ ; FAB-MS(+ve,  $m/z$ ): 740 [M<sup>+</sup>]; Elemental analyses calcd (%) for C<sub>43</sub>H<sub>36</sub>F<sub>2</sub>N<sub>2</sub>OPd·H<sub>2</sub>O: C 68.03, H 5.05, N 3.69. Found: C 67.71, H 5.02, N 3.64.

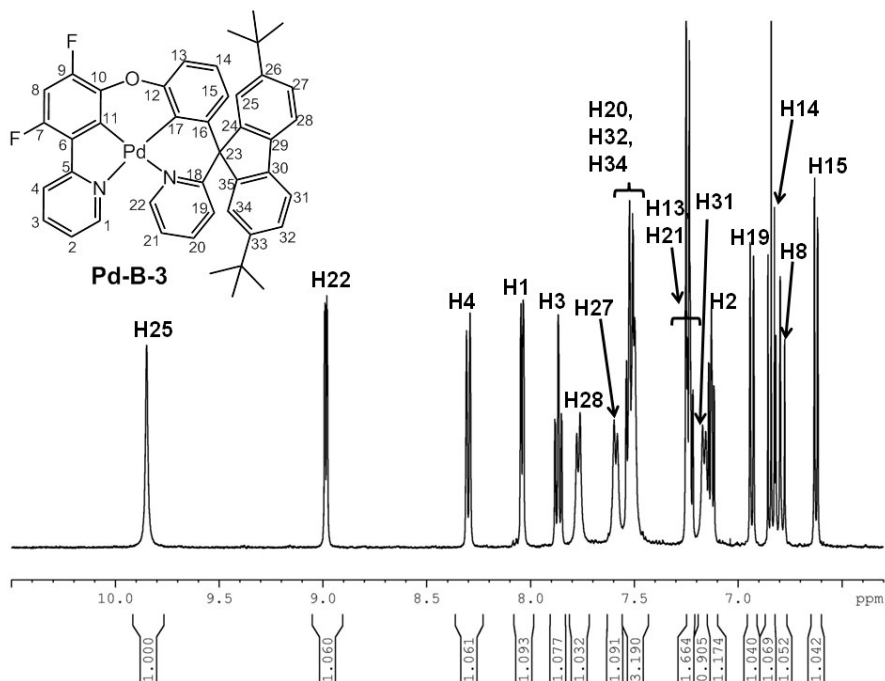

**Fig. S34** <sup>1</sup>H NMR spectrum of **Pd-B-3** (500 MHz, CDCl<sub>3</sub>, 298 K).

**Pd-B-4:** Prepared from the corresponding ligand (0.25 g, 0.38 mmol) and Pd(OAc)<sub>2</sub> (0.095 g, 0.42 mmol); Yellow solid; Isolated yield: 0.13 g (46%); <sup>1</sup>H NMR (600 MHz, CDCl<sub>3</sub>, 25 °C):  $\delta$  = 9.91 (s, 1H, H<sup>29</sup>), 9.22–9.23 (m, 1H, H<sup>26</sup>), 8.97 (d,  $J$  = 8.5 Hz, 1H, H<sup>4</sup>), 8.04 (d,  $J$  = 6.1 Hz, 1H, H<sup>1</sup>), 7.91 (d,  $J$  = 7.4 Hz, 1H, H<sup>13</sup>), 7.86 (d,  $J$  = 7.9 Hz, 1H, H<sup>7</sup>), 7.77–7.81 (m, 3H, H<sup>5</sup>, H<sup>6</sup>, H<sup>32</sup>), 7.48–7.75 (m, 5H, H<sup>2</sup>, H<sup>24</sup>, H<sup>31</sup>, H<sup>35</sup>, H<sup>36</sup>), 7.35–7.38 (m, 2H, H<sup>12</sup>, H<sup>25</sup>), 7.31 (d,  $J$  = 7.8 Hz, 1H, H<sup>11</sup>), 7.18 (dd,  $J$  = 1.0 Hz, 7.7 Hz, 1H, H<sup>17</sup>), 7.08 (s, 1H, H<sup>38</sup>), 6.97 (d,  $J$  = 8.4 Hz, 1H, H<sup>23</sup>), 6.84 (t,  $J$  = 7.8 Hz, 1H, H<sup>18</sup>), 6.61 (dd,  $J$  = 1.0 Hz, 7.7 Hz, 1H, H<sup>19</sup>), 1.39 (s, 9H, 'Bu), 0.42 (s, 9H, 'Bu); <sup>13</sup>C NMR (126 MHz, CDCl<sub>3</sub>, 25 °C):  $\delta$  = 167.0, 162.8, 153.0, 150.6, 150.3, 149.9, 148.9, 143.4, 142.2, 139.5, 139.2, 137.7, 137.6, 136.5, 131.2, 130.9, 128.8, 128.2, 127.0, 126.7, 126.3, 125.2, 125.1, 125.0, 124.5, 124.4, 123.9, 122.9, 121.5, 120.1, 119.6, 118.8, 116.6, 115.8, 70.9, 31.6, 30.5; FAB-MS(+ve,  $m/z$ ): 754 [M<sup>+</sup>]; Elemental analyses calcd (%) for C<sub>47</sub>H<sub>40</sub>N<sub>2</sub>OPd•0.5CHCl<sub>3</sub>•0.5H<sub>2</sub>O: C 69.24, H 5.08, N 3.40. Found: C 69.39, H 5.34, N 3.32.

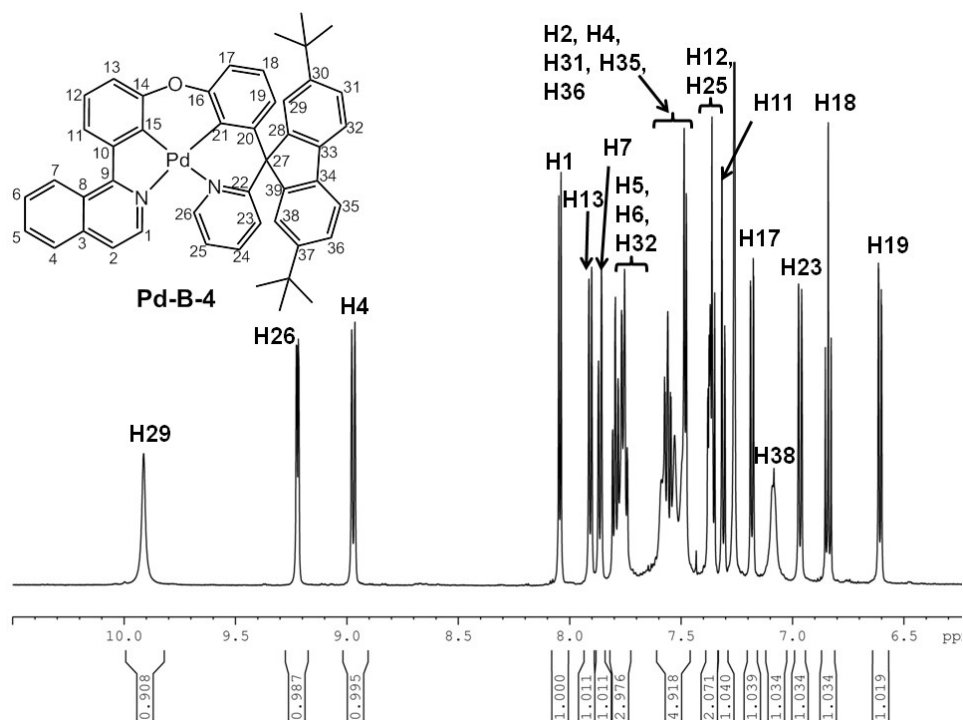

**Fig. S35** <sup>1</sup>H NMR spectrum of **Pd-B-4** (600 MHz, CDCl<sub>3</sub>, 298 K).

**Pd-G-1:** Prepared from the corresponding ligand (0.27 g, 0.67 mmol) and Pd(OAc)<sub>2</sub> (0.18 g, 0.74 mmol); Yellow crystalline solid; Isolated yield: 0.19 g (57%); <sup>1</sup>H NMR (500 MHz, CDCl<sub>3</sub>, 25 °C):  $\delta$  = 8.84–8.85 (m, 1H, H<sup>20</sup>), 7.79 (d,  $J$  = 7.7 Hz, 1H, H<sup>10</sup>), 7.75–7.56 (m, 2H, H<sup>21</sup>, H<sup>22</sup>), 7.52 (d,  $J$  = 7.6 Hz, 1H, H<sup>11</sup>), 7.40 (t,  $J$  = 7.5 Hz, 1H, H<sup>3</sup>), 7.17–7.20 (m, 1H, H<sup>21</sup>), 7.03 (d,  $J$  = 8.4 Hz, 1H, H<sup>4</sup>), 6.70 (d,  $J$  = 7.1 Hz, 1H, H<sup>2</sup>), 6.54 (t,  $J$  = 11 Hz, 1H, H<sup>17</sup>), 1.87 (s, 6H, –CH<sub>3</sub>); <sup>13</sup>C NMR (126 MHz, CDCl<sub>3</sub>, 25 °C):  $\delta$  = 163.7, 162.3, 159.0, 158.9, 157.2, 156.9, 156.8, 156.7, 156.3, 155.4, 150.9, 138.1, 133.2, 129.8, 126.2, 123.0, 122.7, 122.1 (d), 119.7, 116.1 (d), 107.3, 100.2 (t), 46.9, 26.8; <sup>19</sup>F NMR (376 MHz, CDCl<sub>3</sub>, 25 °C):  $\delta$  = –109.07 (t,  $J$  = 11.3 Hz), –109.8 (t,  $J$  = 11.3 Hz); FAB-MS(+ve,  $m/z$ ): 504 [M<sup>+</sup>]; Elemental analyses calcd (%) for C<sub>25</sub>H<sub>16</sub>F<sub>2</sub>N<sub>2</sub>OPd: C 59.48, H 3.19, N 5.55. Found: C 59.21, H 3.12, N 5.66.



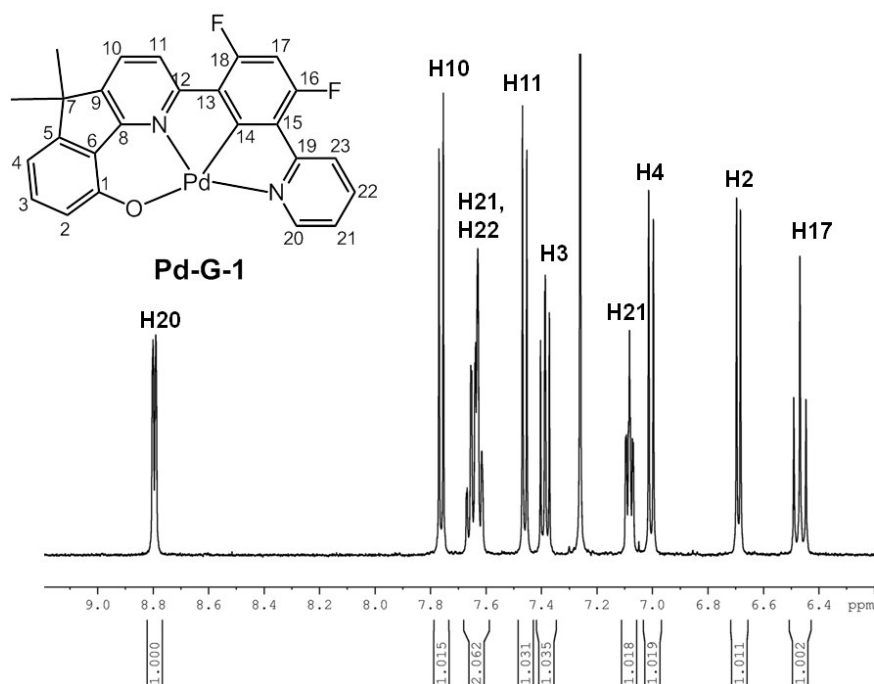

**Fig. S36**  $^1\text{H}$  NMR spectrum of **Pd-G-1** (500 MHz,  $\text{CDCl}_3$ , 298 K).

**Pd-N-1:** Prepared from the corresponding ligand (0.22 g, 0.41 mmol) and  $\text{Pd}(\text{OAc})_2$  (0.1 g, 0.45 mmol); Yellow solid; Isolated yield: 0.15 g (55%);  $^1\text{H}$  NMR (600 MHz,  $\text{CDCl}_3$ , 25 °C):  $\delta$  = 10.0 (m, 1H, H<sup>20</sup>), 7.71 (d,  $J$  = 7.7 Hz, 1H, H<sup>10</sup>), 7.68 (t,  $J$  = 7.6 Hz, 2H, H<sup>25</sup>), 7.59 (t,  $J$  = 7.7 Hz, 1H, H<sup>26</sup>), 7.53 (d,  $J$  = 7.7 Hz, 1H, H<sup>11</sup>), 7.42–7.46 (m, 2H, H<sup>18</sup>, H<sup>22</sup>), 7.39 (t,  $J$  = 7.7 Hz, 1H, H<sup>3</sup>), 7.34 (d,  $J$  = 7.8 Hz, 2H, H<sup>24</sup>), 7.02 (d,  $J$  = 8.2 Hz, 1H, H<sup>2</sup>), 6.99 (t,  $J$  = 7.9 Hz, 1H, H<sup>17</sup>), 6.90 (t,  $J$  = 6.4 Hz, 1H, H<sup>21</sup>), 6.58 (d,  $J$  = 7.0 Hz, 1H, H<sup>4</sup>), 6.37 (d,  $J$  = 8.9 Hz, 1H, H<sup>23</sup>), 6.15 (d,  $J$  = 8.2 Hz, 1H, H<sup>16</sup>), 1.96–2.04 (m, 4H,  $-\text{CH}_2\text{CH}_2\text{CH}_2\text{CH}_3$ ), 1.08–1.26 (m, 4H,  $-\text{CH}_2\text{CH}_2\text{CH}_2\text{CH}_3$ ), 0.67–0.80 (m, 10H,  $-\text{CH}_2\text{CH}_2\text{CH}_2\text{CH}_3$ ); FAB-MS(+ve,  $m/z$ ): 643 [ $\text{M}^+$ ]; Elemental analyses calcd (%) for  $\text{C}_{37}\text{H}_{35}\text{N}_3\text{OPd}$ : C 68.99, H 5.48, N 6.52. Found: C 68.77, H 5.55, N 6.30.

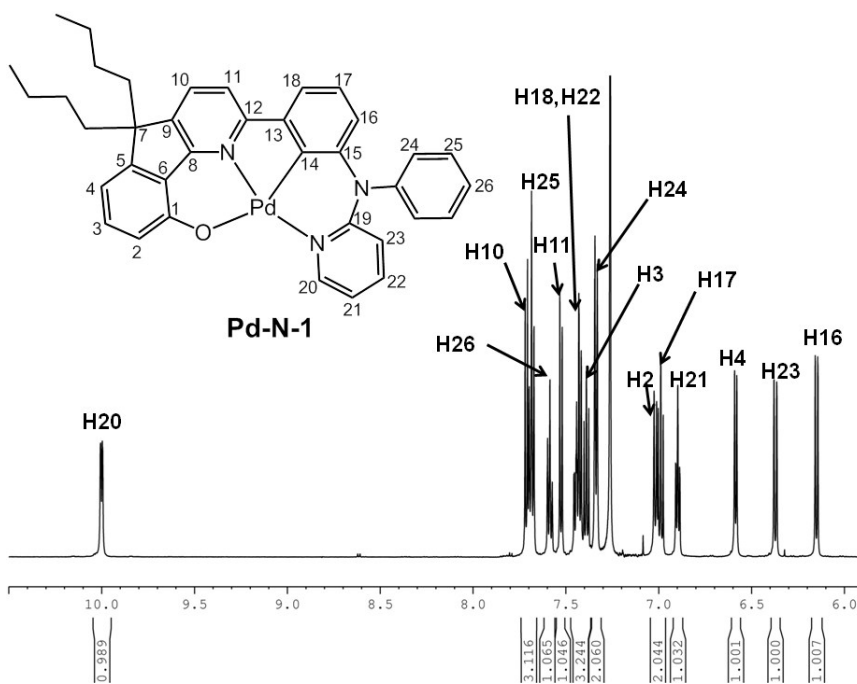

Fig. S37 <sup>1</sup>H NMR spectrum of Pd-N-1 (600 MHz, CDCl<sub>3</sub>, 298 K).

### NMR analysis for the photochemical reactions

All the NMR data of substrates and products of the photochemical reactions in this work were matched with those reported in literatures.<sup>13,14</sup>

Showing below is example of NMR spectra of the resultant mixture of the photochemical reactions:

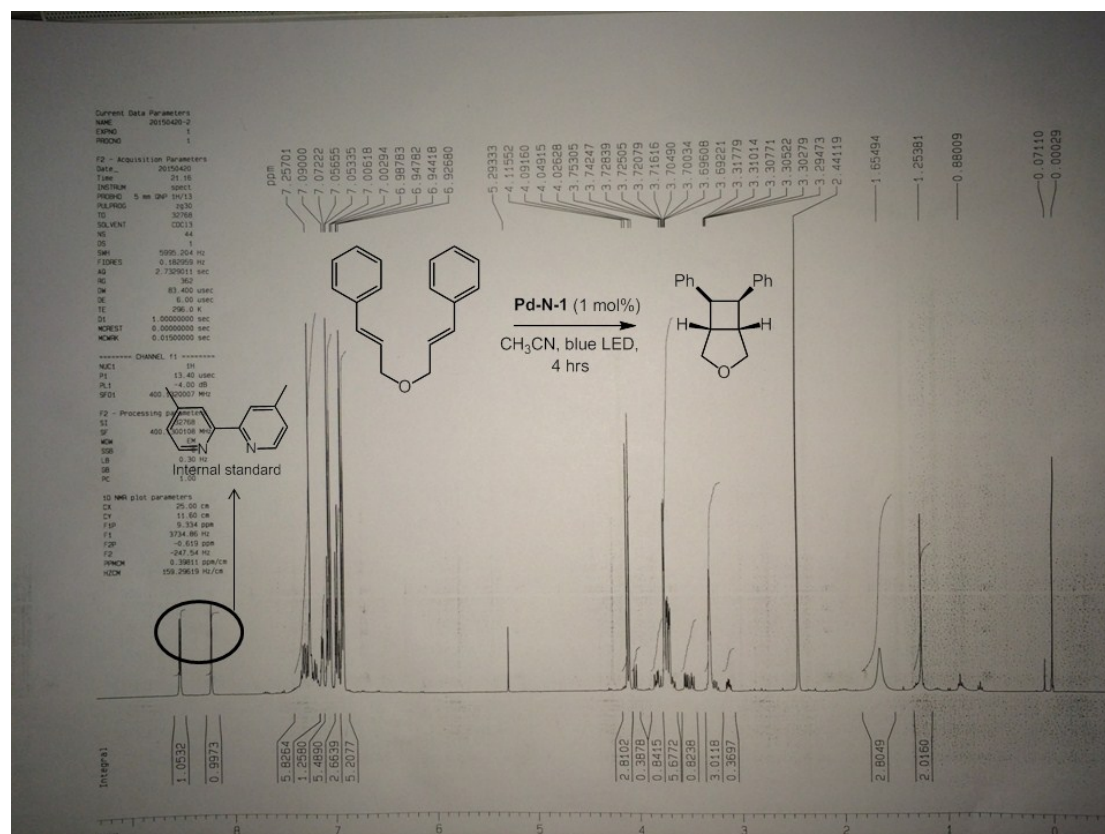

Cartesian coordinates of the optimized geometries

**Table S6**  $S_0$  state of **Pd-B-1**

| Center<br>Number | Atomic<br>Number | Atomic<br>Type | Coordinates (Angstroms) |           |           |
|------------------|------------------|----------------|-------------------------|-----------|-----------|
|                  |                  |                | X                       | Y         | Z         |
| 1                | 46               | 0              | 0.006397                | 0.035220  | 0.044492  |
| 2                | 7                | 0              | 0.013697                | 0.062713  | 2.192515  |
| 3                | 6                | 0              | 1.920524                | -0.195226 | 0.369454  |
| 4                | 8                | 0              | 2.599628                | -0.559529 | -1.929816 |
| 5                | 6                | 0              | 0.307917                | 0.376138  | -1.883279 |
| 6                | 7                | 0              | -2.065069               | -0.094077 | -0.282290 |
| 7                | 6                | 0              | -2.710164               | -0.983289 | 0.495663  |
| 8                | 1                | 0              | -2.077820               | -1.591319 | 1.135418  |
| 9                | 6                | 0              | 2.869448                | -0.512241 | -0.594155 |
| 10               | 6                | 0              | -2.756672               | 0.656082  | -1.152178 |
| 11               | 6                | 0              | -4.157552               | 0.593763  | -1.157649 |
| 12               | 1                | 0              | -4.720178               | 1.234132  | -1.824168 |
| 13               | 6                | 0              | 1.522692                | 0.066830  | -2.518083 |
| 14               | 6                | 0              | -1.016025               | 0.329841  | 3.003895  |
| 15               | 1                | 0              | -1.992166               | 0.391999  | 2.533085  |
| 16               | 6                | 0              | 0.818667                | 1.017210  | -4.603103 |
| 17               | 1                | 0              | 1.004610                | 1.268686  | -5.643780 |
| 18               | 6                | 0              | 1.267702                | -0.002285 | 2.708871  |
| 19               | 6                | 0              | -0.874677               | 0.522061  | 4.370539  |
| 20               | 1                | 0              | -1.744900               | 0.733334  | 4.982323  |
| 21               | 6                | 0              | -4.084903               | -1.127860 | 0.502674  |
| 22               | 1                | 0              | -4.552747               | -1.863323 | 1.147931  |
| 23               | 6                | 0              | 1.776598                | 0.352170  | -3.861510 |
| 24               | 1                | 0              | 2.734917                | 0.066086  | -4.285687 |
| 25               | 6                | 0              | 2.324987                | -0.253775 | 1.723093  |
| 26               | 6                | 0              | 0.403862                | 0.440039  | 4.915648  |
| 27               | 1                | 0              | 0.562862                | 0.587223  | 5.979850  |
| 28               | 6                | 0              | 4.183735                | -0.849484 | -0.251782 |
| 29               | 1                | 0              | 4.890413                | -1.088993 | -1.041858 |
| 30               | 6                | 0              | 1.479424                | 0.180626  | 4.078575  |
| 31               | 1                | 0              | 2.485475                | 0.136588  | 4.480271  |
| 32               | 6                | 0              | -4.825583               | -0.291027 | -0.325684 |
| 33               | 1                | 0              | -5.910540               | -0.335832 | -0.337857 |
| 34               | 6                | 0              | -0.660561               | 1.058332  | -2.666140 |
| 35               | 6                | 0              | -0.380898               | 1.380972  | -4.002233 |
| 36               | 1                | 0              | -1.104988               | 1.930775  | -4.590878 |
| 37               | 6                | 0              | 4.563768                | -0.876459 | 1.085444  |
| 38               | 1                | 0              | 5.584515                | -1.137344 | 1.350377  |
| 39               | 6                | 0              | 3.637638                | -0.581283 | 2.081585  |
| 40               | 1                | 0              | 3.938687                | -0.634121 | 3.124088  |
| 41               | 6                | 0              | -5.040792               | 0.815708  | -6.243202 |
| 42               | 6                | 0              | -2.570254               | 3.952477  | -2.059010 |
| 43               | 6                | 0              | -1.807507               | 2.967080  | -1.415308 |
| 44               | 6                | 0              | -4.178734               | 3.882679  | -4.106494 |
| 45               | 1                | 0              | -4.445136               | 4.936356  | -4.081722 |
| 46               | 6                | 0              | -3.519616               | 1.160286  | -4.200960 |
| 47               | 1                | 0              | -3.244624               | 0.110276  | -4.220214 |
| 48               | 6                | 0              | -2.966876               | 1.987429  | -3.229164 |
| 49               | 6                | 0              | -2.536405               | 5.267295  | -1.601094 |
| 50               | 1                | 0              | -3.120424               | 6.043227  | -2.090014 |
| 51               | 6                | 0              | -3.290392               | 3.344642  | -3.174255 |

|    |   |   |           |           |           |
|----|---|---|-----------|-----------|-----------|
| 52 | 6 | 0 | -2.004988 | 1.597670  | -2.103687 |
| 53 | 6 | 0 | -1.735965 | 5.580776  | -0.508442 |
| 54 | 1 | 0 | -1.712845 | 6.610744  | -0.161708 |
| 55 | 6 | 0 | -0.957793 | 4.612192  | 0.146652  |
| 56 | 6 | 0 | -1.009944 | 3.292296  | -0.325810 |
| 57 | 1 | 0 | -0.413390 | 2.513472  | 0.144152  |
| 58 | 6 | 0 | -4.723833 | 3.049201  | -5.075050 |
| 59 | 1 | 0 | -5.413959 | 3.477945  | -5.797173 |
| 60 | 6 | 0 | -4.409602 | 1.679063  | -5.148195 |
| 61 | 6 | 0 | -0.079658 | 5.027708  | 1.329903  |
| 62 | 6 | 0 | -4.671890 | 1.387736  | -7.622080 |
| 63 | 1 | 0 | -5.029362 | 2.415330  | -7.747701 |
| 64 | 1 | 0 | -5.122019 | 0.778773  | -8.415395 |
| 65 | 1 | 0 | -3.585548 | 1.387851  | -7.767460 |
| 66 | 6 | 0 | 0.685994  | 3.847747  | 1.934075  |
| 67 | 1 | 0 | 0.008825  | 3.080392  | 2.326395  |
| 68 | 1 | 0 | 1.302557  | 4.203762  | 2.767497  |
| 69 | 1 | 0 | 1.353860  | 3.373292  | 1.205728  |
| 70 | 6 | 0 | -0.959744 | 5.640506  | 2.432022  |
| 71 | 1 | 0 | -1.503892 | 6.522495  | 2.077686  |
| 72 | 1 | 0 | -0.339667 | 5.950289  | 3.282098  |
| 73 | 1 | 0 | -1.695294 | 4.912902  | 2.794634  |
| 74 | 6 | 0 | 0.945134  | 6.072774  | 0.857794  |
| 75 | 1 | 0 | 1.593675  | 5.658032  | 0.077563  |
| 76 | 1 | 0 | 1.578330  | 6.386970  | 1.696594  |
| 77 | 1 | 0 | 0.457994  | 6.966243  | 0.452776  |
| 78 | 6 | 0 | -6.569843 | 0.824967  | -6.080689 |
| 79 | 1 | 0 | -6.861966 | 0.407536  | -5.110123 |
| 80 | 1 | 0 | -7.036815 | 0.218901  | -6.866528 |
| 81 | 1 | 0 | -6.980839 | 1.837756  | -6.150629 |
| 82 | 6 | 0 | -4.561390 | -0.637093 | -6.185527 |
| 83 | 1 | 0 | -3.475646 | -0.713220 | -6.315409 |
| 84 | 1 | 0 | -5.033263 | -1.209430 | -6.992063 |
| 85 | 1 | 0 | -4.829781 | -1.118102 | -5.237827 |

-----  
**Table S7** T<sub>1</sub> state of **Pd-B-1**

| Center Number | Atomic Number | Atomic Type | Coordinates (Angstroms) |           |           |
|---------------|---------------|-------------|-------------------------|-----------|-----------|
|               |               |             | X                       | Y         | Z         |
| 1             | 46            | 0           | 0.003923                | 0.081985  | 0.063956  |
| 2             | 7             | 0           | -0.001911               | 0.046687  | 2.193090  |
| 3             | 6             | 0           | 1.912126                | -0.153032 | 0.375884  |
| 4             | 8             | 0           | 2.629895                | -0.458188 | -1.904127 |
| 5             | 6             | 0           | 0.311519                | 0.416669  | -1.869865 |
| 6             | 7             | 0           | -2.071374               | -0.042617 | -0.263515 |
| 7             | 6             | 0           | -2.720976               | -0.921141 | 0.523017  |
| 8             | 1             | 0           | -2.091200               | -1.523302 | 1.170035  |
| 9             | 6             | 0           | 2.850173                | -0.452538 | -0.564582 |
| 10            | 6             | 0           | -2.761126               | 0.695679  | -1.145577 |
| 11            | 6             | 0           | -4.162042               | 0.636099  | -1.152735 |
| 12            | 1             | 0           | -4.722050               | 1.268104  | -1.829308 |
| 13            | 6             | 0           | 1.528381                | 0.112498  | -2.505097 |
| 14            | 6             | 0           | -0.998131               | 0.294525  | 3.021949  |
| 15            | 1             | 0           | -1.972023               | 0.460563  | 2.568810  |
| 16            | 6             | 0           | 0.807684                | 0.998177  | -4.611377 |

|    |   |   |           |           |           |
|----|---|---|-----------|-----------|-----------|
| 17 | 1 | 0 | 0.985611  | 1.224819  | -5.659037 |
| 18 | 6 | 0 | 1.289175  | -0.136167 | 2.725960  |
| 19 | 6 | 0 | -0.863400 | 0.340988  | 4.421712  |
| 20 | 1 | 0 | -1.730741 | 0.553094  | 5.036407  |
| 21 | 6 | 0 | -4.096209 | -1.062386 | 0.530241  |
| 22 | 1 | 0 | -4.566095 | -1.788922 | 1.184149  |
| 23 | 6 | 0 | 1.775355  | 0.363556  | -3.857052 |
| 24 | 1 | 0 | 2.736398  | 0.079169  | -4.276183 |
| 25 | 6 | 0 | 2.304369  | -0.255851 | 1.776297  |
| 26 | 6 | 0 | 0.406458  | 0.091278  | 4.985841  |
| 27 | 1 | 0 | 0.539350  | 0.093162  | 6.063324  |
| 28 | 6 | 0 | 4.208430  | -0.808762 | -0.229108 |
| 29 | 1 | 0 | 4.905667  | -1.042563 | -1.026712 |
| 30 | 6 | 0 | 1.468769  | -0.147052 | 4.151137  |
| 31 | 1 | 0 | 2.455733  | -0.331492 | 4.560430  |
| 32 | 6 | 0 | -4.834116 | -0.235020 | -0.309480 |
| 33 | 1 | 0 | -5.919180 | -0.277179 | -0.322792 |
| 34 | 6 | 0 | -0.663929 | 1.072703  | -2.667319 |
| 35 | 6 | 0 | -0.391999 | 1.365444  | -4.012141 |
| 36 | 1 | 0 | -1.122532 | 1.895639  | -4.610509 |
| 37 | 6 | 0 | 4.607755  | -0.808832 | 1.128027  |
| 38 | 1 | 0 | 5.640825  | -1.034206 | 1.377159  |
| 39 | 6 | 0 | 3.708056  | -0.522117 | 2.121072  |
| 40 | 1 | 0 | 4.026361  | -0.514454 | 3.158245  |
| 41 | 6 | 0 | -5.050656 | 0.796550  | -6.236380 |
| 42 | 6 | 0 | -2.564567 | 3.979368  | -2.096211 |
| 43 | 6 | 0 | -1.805161 | 2.999590  | -1.440106 |
| 44 | 6 | 0 | -4.173580 | 3.888749  | -4.142543 |
| 45 | 1 | 0 | -4.435431 | 4.943816  | -4.131977 |
| 46 | 6 | 0 | -3.527298 | 1.162486  | -4.199485 |
| 47 | 1 | 0 | -3.257593 | 0.110937  | -4.203937 |
| 48 | 6 | 0 | -2.969264 | 2.000486  | -3.239938 |
| 49 | 6 | 0 | -2.528061 | 5.299412  | -1.653584 |
| 50 | 1 | 0 | -3.109685 | 6.070981  | -2.152201 |
| 51 | 6 | 0 | -3.286865 | 3.359716  | -3.203546 |
| 52 | 6 | 0 | -2.007357 | 1.622116  | -2.110406 |
| 53 | 6 | 0 | -1.729056 | 5.623485  | -0.562917 |
| 54 | 1 | 0 | -1.704939 | 6.657108  | -0.227199 |
| 55 | 6 | 0 | -0.954498 | 4.660346  | 0.104403  |
| 56 | 6 | 0 | -1.008320 | 3.335466  | -0.353303 |
| 57 | 1 | 0 | -0.415320 | 2.559958  | 0.126460  |
| 58 | 6 | 0 | -4.723057 | 3.044543  | -5.099254 |
| 59 | 1 | 0 | -5.411486 | 3.466371  | -5.827048 |
| 60 | 6 | 0 | -4.415492 | 1.671990  | -5.153325 |
| 61 | 6 | 0 | -0.080876 | 5.084887  | 1.287675  |
| 62 | 6 | 0 | -4.673344 | 1.344752  | -7.622716 |
| 63 | 1 | 0 | -5.020961 | 2.373652  | -7.764127 |
| 64 | 1 | 0 | -5.127021 | 0.728339  | -8.408243 |
| 65 | 1 | 0 | -3.586649 | 1.332713  | -7.765117 |
| 66 | 6 | 0 | 0.691314  | 3.910930  | 1.895496  |
| 67 | 1 | 0 | 0.019784  | 3.137772  | 2.286090  |
| 68 | 1 | 0 | 1.303083  | 4.272111  | 2.730258  |
| 69 | 1 | 0 | 1.364043  | 3.441204  | 1.168625  |
| 70 | 6 | 0 | -0.967595 | 5.695057  | 2.385871  |
| 71 | 1 | 0 | -1.517417 | 6.571588  | 2.026623  |
| 72 | 1 | 0 | -0.351796 | 6.012489  | 3.236252  |
| 73 | 1 | 0 | -1.698668 | 4.963409  | 2.749373  |

|    |   |   |           |           |           |
|----|---|---|-----------|-----------|-----------|
| 74 | 6 | 0 | 0.938576  | 6.135127  | 0.815688  |
| 75 | 1 | 0 | 1.590642  | 5.723198  | 0.036897  |
| 76 | 1 | 0 | 1.568776  | 6.453922  | 1.654996  |
| 77 | 1 | 0 | 0.447284  | 7.025556  | 0.409032  |
| 78 | 6 | 0 | -6.580055 | 0.820018  | -6.078667 |
| 79 | 1 | 0 | -6.878308 | 0.420362  | -5.102520 |
| 80 | 1 | 0 | -7.049285 | 0.205147  | -6.856268 |
| 81 | 1 | 0 | -6.983028 | 1.834656  | -6.166124 |
| 82 | 6 | 0 | -4.582711 | -0.658854 | -6.155062 |
| 83 | 1 | 0 | -3.497420 | -0.745710 | -6.281928 |
| 84 | 1 | 0 | -5.057839 | -1.240074 | -6.953291 |
| 85 | 1 | 0 | -4.856425 | -1.122460 | -5.200241 |

**Table S8**  $S_0$  state of Pd-B-2

| Center Number | Atomic Number | Atomic Type | Coordinates (Angstroms) |           |           |
|---------------|---------------|-------------|-------------------------|-----------|-----------|
|               |               |             | X                       | Y         | Z         |
| 1             | 46            | 0           | 0.020425                | 0.119809  | 0.074443  |
| 2             | 7             | 0           | 0.042121                | 0.151718  | 2.204939  |
| 3             | 6             | 0           | 1.952117                | 0.060909  | 0.362927  |
| 4             | 8             | 0           | 2.691743                | -0.121647 | -1.956170 |
| 5             | 6             | 0           | 0.299760                | 0.430437  | -1.854477 |
| 6             | 7             | 0           | -2.051945               | -0.176395 | -0.278349 |
| 7             | 6             | 0           | -2.766026               | -1.008034 | 0.509171  |
| 8             | 1             | 0           | -2.199722               | -1.527022 | 1.275600  |
| 9             | 6             | 0           | 2.930420                | -0.113610 | -0.611433 |
| 10            | 6             | 0           | -2.683351               | 0.435171  | -1.280511 |
| 11            | 6             | 0           | -4.063508               | 0.320229  | -1.483750 |
| 12            | 1             | 0           | -4.517371               | 0.860994  | -2.306240 |
| 13            | 6             | 0           | 1.519031                | 0.290406  | -2.533590 |
| 14            | 6             | 0           | -0.996079               | 0.342687  | 3.027210  |
| 15            | 1             | 0           | -1.975534               | 0.378689  | 2.561359  |
| 16            | 6             | 0           | 0.578852                | 1.017753  | -4.631418 |
| 17            | 1             | 0           | 0.686822                | 1.234476  | -5.690235 |
| 18            | 6             | 0           | 1.301052                | 0.137576  | 2.713998  |
| 19            | 6             | 0           | -0.858198               | 0.494033  | 4.398989  |
| 20            | 1             | 0           | -1.734910               | 0.643456  | 5.019511  |
| 21            | 6             | 0           | -4.126120               | -1.198452 | 0.368903  |
| 22            | 1             | 0           | -4.650447               | -1.874875 | 1.034306  |
| 23            | 6             | 0           | 1.663803                | 0.560284  | -3.899286 |
| 24            | 1             | 0           | 2.638463                | 0.421281  | -4.357613 |
| 25            | 6             | 0           | 2.367442                | -0.001808 | 1.715213  |
| 26            | 6             | 0           | 0.424561                | 0.451985  | 4.937751  |
| 27            | 1             | 0           | 0.580802                | 0.566093  | 6.006354  |
| 28            | 6             | 0           | 4.273327                | -0.324396 | -0.276078 |
| 29            | 1             | 0           | 4.999165                | -0.453463 | -1.074309 |
| 30            | 6             | 0           | 1.508308                | 0.278983  | 4.089003  |
| 31            | 1             | 0           | 2.516113                | 0.271468  | 4.488196  |
| 32            | 6             | 0           | -4.791408               | -0.499702 | -0.642648 |
| 33            | 1             | 0           | -5.861804               | -0.614228 | -0.784019 |
| 34            | 6             | 0           | -0.750690               | 0.917023  | -2.643156 |
| 35            | 6             | 0           | -0.644744               | 1.211520  | -3.998982 |
| 36            | 1             | 0           | -1.512265               | 1.587472  | -4.532229 |
| 37            | 6             | 0           | 4.656854                | -0.368117 | 1.058114  |
| 38            | 1             | 0           | 5.699354                | -0.533002 | 1.314766  |

|    |   |   |           |           |           |
|----|---|---|-----------|-----------|-----------|
| 39 | 6 | 0 | 3.706482  | -0.208756 | 2.062251  |
| 40 | 1 | 0 | 4.014611  | -0.266739 | 3.102142  |
| 41 | 8 | 0 | -2.015119 | 1.230439  | -2.127341 |

**Table S9** T<sub>1</sub> state of Pd-B-2

| Center Number | Atomic Number | Atomic Type | Coordinates (Angstroms) |           |           |
|---------------|---------------|-------------|-------------------------|-----------|-----------|
|               |               |             | X                       | Y         | Z         |
| 1             | 46            | 0           | 0.007494                | 0.157587  | 0.070241  |
| 2             | 7             | 0           | 0.019830                | 0.178490  | 2.181984  |
| 3             | 6             | 0           | 1.932223                | 0.099354  | 0.345432  |
| 4             | 8             | 0           | 2.695084                | -0.085526 | -1.948546 |
| 5             | 6             | 0           | 0.295276                | 0.433881  | -1.868028 |
| 6             | 7             | 0           | -2.069565               | -0.133216 | -0.279129 |
| 7             | 6             | 0           | -2.791670               | -0.939933 | 0.526497  |
| 8             | 1             | 0           | -2.231280               | -1.440065 | 1.309337  |
| 9             | 6             | 0           | 2.900691                | -0.073084 | -0.601951 |
| 10            | 6             | 0           | -2.693654               | 0.451243  | -1.302127 |
| 11            | 6             | 0           | -4.072542               | 0.334101  | -1.511046 |
| 12            | 1             | 0           | -4.519322               | 0.852224  | -2.351805 |
| 13            | 6             | 0           | 1.515301                | 0.281689  | -2.544132 |
| 14            | 6             | 0           | -0.981748               | 0.380096  | 3.015784  |
| 15            | 1             | 0           | -1.967672               | 0.482862  | 2.570749  |
| 16            | 6             | 0           | 0.573581                | 0.930168  | -4.665801 |
| 17            | 1             | 0           | 0.679984                | 1.111321  | -5.731374 |
| 18            | 6             | 0           | 1.327453                | 0.090850  | 2.705549  |
| 19            | 6             | 0           | -0.836828               | 0.457413  | 4.414004  |
| 20            | 1             | 0           | -1.710410               | 0.626729  | 5.032976  |
| 21            | 6             | 0           | -4.152020               | -1.129198 | 0.384293  |
| 22            | 1             | 0           | -4.682290               | -1.784655 | 1.065827  |
| 23            | 6             | 0           | 1.660901                | 0.504700  | -3.918139 |
| 24            | 1             | 0           | 2.637133                | 0.357193  | -4.370511 |
| 25            | 6             | 0           | 2.341585                | 0.040259  | 1.750158  |
| 26            | 6             | 0           | 0.450802                | 0.293038  | 4.971415  |
| 27            | 1             | 0           | 0.591109                | 0.317970  | 6.047515  |
| 28            | 6             | 0           | 4.285209                | -0.271303 | -0.267440 |
| 29            | 1             | 0           | 5.004766                | -0.412008 | -1.067013 |
| 30            | 6             | 0           | 1.518560                | 0.110316  | 4.130924  |
| 31            | 1             | 0           | 2.518317                | -0.005980 | 4.533562  |
| 32            | 6             | 0           | -4.809000               | -0.458258 | -0.650774 |
| 33            | 1             | 0           | -5.878907               | -0.573342 | -0.795472 |
| 34            | 6             | 0           | -0.755605               | 0.889950  | -2.673470 |
| 35            | 6             | 0           | -0.650573               | 1.139048  | -4.038786 |
| 36            | 1             | 0           | -1.519555               | 1.494306  | -4.583828 |
| 37            | 6             | 0           | 4.683544                | -0.257989 | 1.091441  |
| 38            | 1             | 0           | 5.735132                | -0.377887 | 1.335824  |
| 39            | 6             | 0           | 3.761002                | -0.092814 | 2.089338  |
| 40            | 1             | 0           | 4.078886                | -0.077395 | 3.126409  |
| 41            | 8             | 0           | -2.018838               | 1.222510  | -2.166575 |

**Table S10** S<sub>0</sub> state of Pd-N-1

| Center Number | Atomic Number | Atomic Type | Coordinates (Angstroms) |   |   |
|---------------|---------------|-------------|-------------------------|---|---|
|               |               |             | X                       | Y | Z |

|    |    |   |           |           |           |
|----|----|---|-----------|-----------|-----------|
| 1  | 46 | 0 | -0.056482 | 0.179160  | 0.007854  |
| 2  | 7  | 0 | -0.037780 | 0.468017  | 2.027745  |
| 3  | 6  | 0 | 1.878174  | 0.284339  | -0.089919 |
| 4  | 7  | 0 | 0.130946  | -0.076755 | -1.957244 |
| 5  | 8  | 0 | -2.157576 | 0.036790  | -0.069534 |
| 6  | 6  | 0 | -2.855961 | -0.163896 | -1.152499 |
| 7  | 6  | 0 | -4.270977 | -0.250420 | -1.115225 |
| 8  | 1  | 0 | -4.768060 | -0.145213 | -0.154110 |
| 9  | 6  | 0 | -5.007547 | -0.463870 | -2.270370 |
| 10 | 1  | 0 | -6.091234 | -0.523950 | -2.193806 |
| 11 | 6  | 0 | -4.411087 | -0.607107 | -3.536003 |
| 12 | 1  | 0 | -5.032085 | -0.781002 | -4.407421 |
| 13 | 6  | 0 | -3.028964 | -0.528746 | -3.616900 |
| 14 | 6  | 0 | -2.284136 | -0.309807 | -2.439023 |
| 15 | 6  | 0 | -0.894948 | -0.257646 | -2.787565 |
| 16 | 6  | 0 | -0.736178 | -0.429506 | -4.172186 |
| 17 | 6  | 0 | 0.543993  | -0.409101 | -4.688017 |
| 18 | 6  | 0 | 1.623625  | -0.221024 | -3.810980 |
| 19 | 1  | 0 | 2.636246  | -0.202608 | -4.198267 |
| 20 | 6  | 0 | 1.401119  | -0.056952 | -2.448443 |
| 21 | 1  | 0 | 0.731992  | -0.536380 | -5.751249 |
| 22 | 6  | 0 | 2.403463  | 0.143894  | -1.400722 |
| 23 | 6  | 0 | 3.774854  | 0.189908  | -1.652260 |
| 24 | 1  | 0 | 4.165287  | 0.079987  | -2.659911 |
| 25 | 6  | 0 | 4.641564  | 0.377493  | -0.584943 |
| 26 | 1  | 0 | 5.714337  | 0.416728  | -0.750211 |
| 27 | 6  | 0 | 4.152381  | 0.516717  | 0.707690  |
| 28 | 1  | 0 | 4.862255  | 0.660212  | 1.512533  |
| 29 | 6  | 0 | 2.768663  | 0.472882  | 0.972707  |
| 30 | 6  | 0 | 1.048302  | 0.632686  | 2.818013  |
| 31 | 6  | 0 | 0.864068  | 0.824505  | 4.211518  |
| 32 | 1  | 0 | 1.723703  | 0.957893  | 4.851572  |
| 33 | 6  | 0 | -0.397588 | 0.845610  | 4.758272  |
| 34 | 1  | 0 | -0.513978 | 0.995258  | 5.827671  |
| 35 | 6  | 0 | -1.507507 | 0.675301  | 3.928793  |
| 36 | 1  | 0 | -2.523071 | 0.683359  | 4.307587  |
| 37 | 6  | 0 | -1.273453 | 0.492585  | 2.587169  |
| 38 | 1  | 0 | -2.083584 | 0.351859  | 1.879357  |
| 39 | 6  | 0 | -2.096275 | -0.617976 | -4.831811 |
| 40 | 6  | 0 | -2.285875 | 0.568277  | -5.815555 |
| 41 | 6  | 0 | -3.545483 | 0.625600  | -6.674279 |
| 42 | 1  | 0 | -1.415977 | 0.572506  | -6.488137 |
| 43 | 1  | 0 | -2.217915 | 1.493872  | -5.226542 |
| 44 | 6  | 0 | -3.606642 | 1.911400  | -7.497293 |
| 45 | 1  | 0 | -3.575583 | -0.231806 | -7.358847 |
| 46 | 1  | 0 | -4.442655 | 0.563850  | -6.045701 |
| 47 | 6  | 0 | -4.834454 | 1.980661  | -8.397321 |
| 48 | 1  | 0 | -3.597284 | 2.775083  | -6.817911 |
| 49 | 1  | 0 | -2.696861 | 1.994329  | -8.108722 |
| 50 | 1  | 0 | -4.859072 | 2.913801  | -8.971030 |
| 51 | 1  | 0 | -4.847421 | 1.148877  | -9.112093 |
| 52 | 1  | 0 | -5.758501 | 1.925878  | -7.809155 |
| 53 | 6  | 0 | -2.097097 | -2.006559 | -5.531136 |
| 54 | 6  | 0 | -3.432456 | -2.687241 | -5.826946 |
| 55 | 1  | 0 | -1.513716 | -2.695130 | -4.904949 |
| 56 | 1  | 0 | -1.528487 | -1.898881 | -6.466952 |
| 57 | 6  | 0 | -3.240113 | -3.989586 | -6.601709 |



|    |   |   |           |           |           |
|----|---|---|-----------|-----------|-----------|
| 58 | 1 | 0 | -3.947142 | -2.904287 | -4.882688 |
| 59 | 1 | 0 | -4.099551 | -2.029606 | -6.396811 |
| 60 | 6 | 0 | -4.551313 | -4.719687 | -6.866348 |
| 61 | 1 | 0 | -2.739017 | -3.774162 | -7.556121 |
| 62 | 1 | 0 | -2.559411 | -4.646525 | -6.041896 |
| 63 | 1 | 0 | -4.387859 | -5.648459 | -7.424209 |
| 64 | 1 | 0 | -5.055130 | -4.978220 | -5.927170 |
| 65 | 1 | 0 | -5.239678 | -4.096454 | -7.450087 |
| 66 | 7 | 0 | 2.340021  | 0.621874  | 2.320775  |
| 67 | 6 | 0 | 3.388817  | 0.781189  | 3.294339  |
| 68 | 6 | 0 | 3.856169  | 2.056614  | 3.605683  |
| 69 | 6 | 0 | 3.939252  | -0.344391 | 3.903696  |
| 70 | 6 | 0 | 4.880366  | 2.204720  | 4.537736  |
| 71 | 1 | 0 | 3.415991  | 2.920811  | 3.116134  |
| 72 | 6 | 0 | 4.963096  | -0.190545 | 4.835295  |
| 73 | 1 | 0 | 3.562794  | -1.329857 | 3.644188  |
| 74 | 6 | 0 | 5.433737  | 1.082619  | 5.152723  |
| 75 | 1 | 0 | 5.246136  | 3.197750  | 4.782487  |
| 76 | 1 | 0 | 5.393142  | -1.066495 | 5.312326  |
| 77 | 1 | 0 | 6.232639  | 1.200523  | 5.879244  |

**Table S11** T<sub>2</sub> state of Pd-N-1

| Center Number | Atomic Number | Atomic Type | Coordinates (Angstroms) |           |           |
|---------------|---------------|-------------|-------------------------|-----------|-----------|
|               |               |             | X                       | Y         | Z         |
| 1             | 46            | 0           | -0.065486               | 0.169702  | 0.050765  |
| 2             | 7             | 0           | -0.029847               | 0.437147  | 2.068370  |
| 3             | 6             | 0           | 1.867050                | 0.272131  | -0.059590 |
| 4             | 7             | 0           | 0.093730                | -0.074968 | -1.907337 |
| 5             | 8             | 0           | -2.214345               | 0.028642  | -0.065433 |
| 6             | 6             | 0           | -2.891474               | -0.161097 | -1.135870 |
| 7             | 6             | 0           | -4.318565               | -0.241682 | -1.108634 |
| 8             | 1             | 0           | -4.818600               | -0.137581 | -0.150113 |
| 9             | 6             | 0           | -5.031388               | -0.445420 | -2.265787 |
| 10            | 1             | 0           | -6.115967               | -0.501879 | -2.211747 |
| 11            | 6             | 0           | -4.411884               | -0.588186 | -3.537418 |
| 12            | 1             | 0           | -5.032454               | -0.754031 | -4.410575 |
| 13            | 6             | 0           | -3.039397               | -0.519613 | -3.618639 |
| 14            | 6             | 0           | -2.291761               | -0.304840 | -2.431863 |
| 15            | 6             | 0           | -0.910844               | -0.252507 | -2.751503 |
| 16            | 6             | 0           | -0.758889               | -0.424539 | -4.155406 |
| 17            | 6             | 0           | 0.560509                | -0.411551 | -4.689466 |
| 18            | 6             | 0           | 1.605878                | -0.232853 | -3.828645 |
| 19            | 1             | 0           | 2.623509                | -0.218352 | -4.205533 |
| 20            | 6             | 0           | 1.397976                | -0.057996 | -2.398594 |
| 21            | 1             | 0           | 0.738990                | -0.541428 | -5.753276 |
| 22            | 6             | 0           | 2.372644                | 0.128407  | -1.406694 |
| 23            | 6             | 0           | 3.773900                | 0.178547  | -1.650808 |
| 24            | 1             | 0           | 4.164714                | 0.071277  | -2.658598 |
| 25            | 6             | 0           | 4.633967                | 0.364608  | -0.586876 |
| 26            | 1             | 0           | 5.706897                | 0.404280  | -0.756189 |
| 27            | 6             | 0           | 4.156797                | 0.505101  | 0.716569  |
| 28            | 1             | 0           | 4.868853                | 0.648901  | 1.517959  |
| 29            | 6             | 0           | 2.754702                | 0.459330  | 0.985459  |
| 30            | 6             | 0           | 1.061069                | 0.607990  | 2.852596  |

|    |   |   |           |           |           |
|----|---|---|-----------|-----------|-----------|
| 31 | 6 | 0 | 0.886938  | 0.790215  | 4.249544  |
| 32 | 1 | 0 | 1.751341  | 0.929899  | 4.881941  |
| 33 | 6 | 0 | -0.368926 | 0.792709  | 4.808292  |
| 34 | 1 | 0 | -0.478136 | 0.934496  | 5.879449  |
| 35 | 6 | 0 | -1.484778 | 0.612840  | 3.986484  |
| 36 | 1 | 0 | -2.497021 | 0.605652  | 4.374132  |
| 37 | 6 | 0 | -1.260256 | 0.442360  | 2.642460  |
| 38 | 1 | 0 | -2.080054 | 0.299420  | 1.947951  |
| 39 | 6 | 0 | -2.103813 | -0.607673 | -4.827373 |
| 40 | 6 | 0 | -2.295368 | 0.582804  | -5.808294 |
| 41 | 6 | 0 | -3.524946 | 0.611720  | -6.711463 |
| 42 | 1 | 0 | -1.403355 | 0.614471  | -6.450382 |
| 43 | 1 | 0 | -2.270814 | 1.504896  | -5.210852 |
| 44 | 6 | 0 | -3.584405 | 1.894450  | -7.539260 |
| 45 | 1 | 0 | -3.512662 | -0.247621 | -7.394279 |
| 46 | 1 | 0 | -4.443731 | 0.531962  | -6.116052 |
| 47 | 6 | 0 | -4.784988 | 1.939917  | -8.476721 |
| 48 | 1 | 0 | -3.611142 | 2.759663  | -6.862358 |
| 49 | 1 | 0 | -2.657837 | 1.991908  | -8.122486 |
| 50 | 1 | 0 | -4.807211 | 2.870638  | -9.054373 |
| 51 | 1 | 0 | -4.762219 | 1.105772  | -9.188477 |
| 52 | 1 | 0 | -5.725774 | 1.871885  | -7.917130 |
| 53 | 6 | 0 | -2.112140 | -1.992066 | -5.539532 |
| 54 | 6 | 0 | -3.450766 | -2.673794 | -5.822493 |
| 55 | 1 | 0 | -1.516968 | -2.684182 | -4.928921 |
| 56 | 1 | 0 | -1.558489 | -1.873005 | -6.482637 |
| 57 | 6 | 0 | -3.269296 | -3.959807 | -6.626410 |
| 58 | 1 | 0 | -3.945066 | -2.913175 | -4.872437 |
| 59 | 1 | 0 | -4.132007 | -2.008066 | -6.365927 |
| 60 | 6 | 0 | -4.582286 | -4.692146 | -6.875583 |
| 61 | 1 | 0 | -2.791192 | -3.722658 | -7.587336 |
| 62 | 1 | 0 | -2.572480 | -4.623233 | -6.094925 |
| 63 | 1 | 0 | -4.426089 | -5.608994 | -7.454743 |
| 64 | 1 | 0 | -5.063524 | -4.971856 | -5.930633 |
| 65 | 1 | 0 | -5.286882 | -4.062000 | -7.431876 |
| 66 | 7 | 0 | 2.344522  | 0.612189  | 2.339695  |
| 67 | 6 | 0 | 3.401711  | 0.793507  | 3.300420  |
| 68 | 6 | 0 | 3.852640  | 2.077993  | 3.597442  |
| 69 | 6 | 0 | 3.974960  | -0.318521 | 3.913460  |
| 70 | 6 | 0 | 4.884244  | 2.249111  | 4.517439  |
| 71 | 1 | 0 | 3.394755  | 2.931299  | 3.105119  |
| 72 | 6 | 0 | 5.006194  | -0.142008 | 4.832895  |
| 73 | 1 | 0 | 3.611065  | -1.311518 | 3.665100  |
| 74 | 6 | 0 | 5.461097  | 1.140545  | 5.135317  |
| 75 | 1 | 0 | 5.237925  | 3.249490  | 4.749897  |
| 76 | 1 | 0 | 5.454869  | -1.007671 | 5.311629  |
| 77 | 1 | 0 | 6.266044  | 1.276210  | 5.852046  |

### Further details on energy transfer processes<sup>17,18</sup>

#### (1) energy transfer in [2+2] cycloaddition of styrene:

There are a number of mechanistic alternatives to the [2+2] photo-cycloaddition of styrenes, one of which involves the triplet excited state of the styrene. The lowest triplet excited state of styrene, frequently of  $\pi\pi^*$  character, is a diradical with a long lifetime in the  $\mu\text{s}$  regime. Thus, the radiative and non-radiative decay of the  $T_1$  excited state of the styrene is less competitive with the photo-cycloaddition reaction and is a

more efficient reaction pathway. Population of the triplet excited state of a styrene could be brought about by direct excitation, but it can also be induced by energy transfer from another photoexcited molecule. Here, the triplet excited state of the Pd(II) complexes transfer energy to the triplet excited state of styrene *via* an electron exchange mechanism (Dexter mechanism). As this mechanism requires only a close spatial encounter of the Pd(II) complex and styrene and a favourable energy order (the triplet excited state of the styrene is lower-lying than the triplet excited state of the Pd(II) complexes) for effective triplet energy transfer, this mechanism is feasible in the present case as the triplet excited states of the Pd(II) complexes are up to 2.71 eV, which is higher-lying than the triplet excited states of the styrenes.

On the other hand, the energy transfer from the triplet excited state of the Pd(II) complexes to the singlet excited state of the styrene is not possible *via* Förster resonance energy transfer (FRET) owing to the fact that the singlet excited state of styrene is much higher-lying (~4.0 to 5.0 eV) than the triplet excited state of the Pd(II) complexes studied in this work. Energy transfer from the triplet excited state of the Pd(II) complexes to the triplet excited state of styrene by FRET is also forbidden as the  $S_0 \rightarrow T_1$  absorption of styrene is spin-forbidden. Thus, the most probable mechanism for energy transfer from the Pd(II) complex to the styrene is the Dexter mechanism.

(2) *energy transfer between the triplet excited state of the Pd(II) complexes and the singlet excited state of the fluorescent dyes, TBRb/TTPA, in PSF-OLED*

There are two mechanism for triplet-singlet energy transfer: Förster resonance energy transfer (FRET) and Dexter mechanism. The energy transfer rates for these two mechanism are respectively

$$k_{FRET} \sim \frac{f_D f_A}{R^6 \nu^2} J \quad \text{and} \quad k_D \sim e^{-\left(\frac{2R}{L}\right)^2} J$$

$f_D$  and  $f_A$  denote the oscillator strengths of the donor (D) and the acceptor (A), R is the distance between the donor and the acceptor, and L is an effective average orbital radius of the donor and acceptor states.  $J$  is the spectral overlap between the normalized donor emission and acceptor absorption. As the phosphor-sensitized fluorescence is brought about by

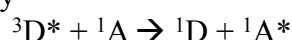

Dexter mechanism (also called a collision mechanism) is unlikely since it violates the Wigner-Witmer spin-conservation rule. On the contrary, for the FRET mechanism, as it is based on classical dipole-dipole interactions, this mechanism is feasible for this energy transfer process. Normally,  $f_D$  is zero for a triplet to singlet transition because it violates the spin-selection rule and  $f_D = 0$  in the absence of spin-orbit coupling. Here, in the presence of a transition metal ion, Pd, heavy atom effect comes into play and lifts up the spin-selection rule such that  $f_D \neq 0$ . Thus, the most likely mechanism for the PSF-OLED is FRET.

## References

- 1 G. M. Sheldrick, *Acta Crystallogr. Sect. A*, 2008, **64**, 112.
- 2 (a) W.-M. Kwok, C. Ma and D. L. Phillips, *J. Am. Chem. Soc.*, 2006, **128**, 11894; (b) W.-M. Kwok, C. Ma and D. L. Phillips, *J. Am. Chem. Soc.*, 2008, **130**, 5131; (c) P. Matousek, M. Towrie, C. Ma, W.-M. Kwok, D. L. Phillips, W. T. Toner and A. W. Parker, *J. Raman Spectrosc.*, 2001, **32**, 983; (d) P. Matousek, M. Towrie, A. Stanley and A. W. Parker, *Appl. Spectrosc.*, 1999, **53**, 1485.

- 3 C. Adamo and V. Barone, *J. Chem. Phys.*, 1999, **110**, 6158.
- 4 M. J. Frisch, G. W. Trucks, H. B. Schlegel, G. E. Scuseria, M. A. Robb, J. R. Cheeseman, G. Scalmani, V. Barone, B. Mennucci, G. A. Petersson, H. Nakatsuji, M. Caricato, X. Li, H. P. Hratchian, A. F. Izmaylov, J. Bloino, G. Zheng, J. L. Sonnenberg, M. Hada, M. Ehara, K. Toyota, R. Fukuda, J. Hasegawa, M. Ishida, T. Nakajima, Y. Honda, O. Kitao, H. Nakai, T. Vreven, J. A. Montgomery Jr, J. E. Peralta, F. Ogliaro, M. Bearpark, J. J. Heyd, E. Brothers, K. N. Kudin, V. N. Staroverov, R. Kobayashi, J. Normand, K. Raghavachari, A. Rendell, J. C. Burant, S. S. Iyengar, J. Tomasi, M. Cossi, N. Rega, J. M. Millam, M. Klene, J. E. Knox, J. B. Cross, V. Bakken, C. Adamo, J. Jaramillo, R. Gomperts, R. E. Stratmann, O. Yazyev, A. J. Austin, R. Cammi, C. Pomelli, J. W. Ochterski, R. L. Martin, K. Morokuma, V. G. Zakrzewski, G. A. Voth, P. Salvador, J. J. Dannenberg, S. Dapprich, A. D. Daniels, Ö. Farkas, J. B. Foresman, J. V. Ortiz, J. Cioslowski and D. J. Fox, *Gaussian 09 (Revision C.01)*, Gaussian, Inc., Wallingford CT, 2009.
- 5 (a) M. M. Francl, W. J. Pietro, W. J. Hehre, J. S. Binkley, M. S. Gordon, D. J. DeFree and J. A. Pople, *J. Chem. Phys.*, 1982, **77**, 3654; (b) P. C. Hariharan and J. A. Pople, *Theor. Chim. Acta*, 1973, **28**, 213.
- 6 (a) D. Andrae, U. Haeussermann, M. Dolg, H. Stoll and H. Preuss, *Theor. Chim. Acta*, 1990, **77**, 123; (b) J. M. L. Martin and A. Sundermann, *J. Chem. Phys.*, 2001, **114**, 3408.
- 7 M. Cossi, G. Scalmani, N. Rega and V. Barone, *J. Chem. Phys.*, 2002, **117**, 43.
- 8 (a) G. S. M. Tong, P. K. Chow, W.-P. To, W.-M. Kwok and C.-M. Che, *Chem. Eur. J.*, 2014, **20**, 6433; (b) G. S. M. Tong, K. T. Chan, X. Chang and C.-M. Che, *Chem. Sci.*, 2015, **6**, 3026.
- 9 R. Improta, V. Barone, G. Scalmani and M. J. Frisch, *J. Chem. Phys.*, 2006, **125**, 054103: 054101-054109.
- 10 P. K. Chow, C. Ma, W.-P. To, G. S. M. Tong, S.-L. Lai, S. C. F. Kui, W.-M. Kwok and C.-M. Che, *Angew. Chem. Int. Ed.*, 2013, **52**, 11775.
- 11 G. Cheng, P.-K. Chow, S. C. F. Kui, C.-C. Kwok and C.-M. Che, *Adv. Mater.*, 2013, **25**, 6765.
- 12 E. Turner, N. Bakken and J. Li, *Inorg. Chem.*, 2013, **52**, 7344.
- 13 G. Revol, T. McCallum, M. Morin, F. Gagosz and L. Barriault, *Angew. Chem. Int. Ed.*, 2013, **52**, 13342.
- 14 Z. Lu and T. P. Yoon, *Angew. Chem. Int. Ed.*, 2012, **51**, 10329.
- 15 C. O'Brien, M. Y. Wong, D. B. Cordes, A. M. Z. Slawin and E. Zysman-Colman, *Organometallics*, 2015, **34**, 13.
- 16 S. Thapa, A. Kafle, S. K. Gurung, A. Montoya, P. Riedel and R. Giri, *Angew. Chem. Int. Ed.*, 2015, **54**, 8236.
- 17 M. Klessinger, J. Michl, *Excited States and Photochemistry of Organic Molecules*, VCH Publishers, New York, 1995.
- 18 A. Köhler, H. Bässler, *Materials Science and Engineering R*, 2009, **66**, 71.
